# Supplementary material for: Citation Patterns of a Controversial and High-Impact Paper: Worm et al. (2006) “Impacts of Biodiversity Loss on Ocean Ecosystem Services”
Source: PLoS One. 2013 Feb 20;8(2):e56723. doi: 10.1371/journal.pone.0056723 (PMC3577754; doi:10.1371/journal.pone.0056723)
Supplement: Table S1 — Complete list of papers examined, citation texts referring to Worm et al. [24] , and coded variables used in the analysis. (XLSX) [file pone.0056723.s001.xlsx]

## Sheet: All references
PaperID	JournalField	ImpactFactor	Year	AnyWormCoauthor	TotalAuthors	GenderFirstAuthor	CountryGroupFirstAuthor	InOpeningSentence	InFirstParagraph	InAbstractIntroduction	InDiscussionConclusions	InLastParagraph	NumCitesOfWorm2006	About2048	AboutFisheriesCollapse	AboutBiodiversityStabilityRelation	Full citation	pdf available	JournalName	Journal field (Ecology/Fisheries/Conservation/Policy/Economics/Anthropology/Multidisciplinary/Oceanography/Biology/Other)	CountryFirstAuthor	Citation text [with // between citations]	Intro/Method/Results/Discussion	InMethodsResults	InstitutionFirstAuthor	FirstAuthorInWorm2006	NumberWorm2006Authors	JournalImpactFactor
1	Multidisciplinary	3-5	2011	Yes	6	Male	USA	Yes	Yes	Yes	No	No	1	No	Yes	No	Aburto-Oropeza, O., B. Erisman, G. R. Galland, I. Mascarenas-Osorio, E. Sala, and E. Ezcurra. 2011. Large Recovery of Fish Biomass in a No-Take Marine Reserve. Plos One 6.	Yes	PLoS One	Multidisciplinary	USA	"Overfishing has impacted marine biodiversity and ecosystems both directly (through removal of significant biomass) and indirectly (by changing ecological linkages) throughout history [1,2]"	Intro	No	Scripps Institution of Oceanography	No	1	4.092
2	Multidisciplinary	>5	2008	Yes	6	Male	USA	No	Yes	Yes	No	No	1	No	No	Yes	Aburto-Oropeza, O., E. Ezcurra, G. Danemann, V. Valdez, J. Murray, and E. Sala. 2008. Mangroves in the Gulf of California increase fishery yields. Proceedings of the National Academy of Sciences of the United States of America 105:10456-10459.	Yes	Proceedings of the National Academy of Sciences of the United States of America	Multidisciplinary	USA	"evidence linking ecological processes and economic benefits has been scarce (16)"	Intro	No	Scripps Institution of Oceanography	No	1	9.681
3	Ecology	2-3	2009	No	3	Male	USA	Yes	Yes	Yes	No	No	1	No	Yes	No	Adams, A. J., R. K. Wolfe, and C. A. Layman. 2009. Preliminary Examination of How Human-driven Freshwater Flow Alteration Affects Trophic Ecology of Juvenile Snook (Centropomus undecimalis) in Estuarine Creeks. Estuaries and Coasts 32:819-828.	Yes	Estuaries and Coasts	Ecology	USA	"Collapse of estuarine and marine fisheries is increasingly acknowledged as one of the gravest global environmental crises (Pauly et al. 1998; Worm et al. 2006)"	Intro	No	Mote Marine Laboratory	No	0	2.109
4	Fisheries	>5	2009	No	2	Male	USA	No	No	No	Yes	Yes	1	No	No	No	Ainley, D. G. and L. K. Blight. 2009. Ecological repercussions of historical fish extraction from the Southern Ocean. Fish and Fisheries 10:13-38.	Yes	Fish and Fisheries	Fisheries	USA	"Gauging the true ecological role of the depleted demersal fish may now be beyond our research capability, unless of course food webs over significant areas are allowed to recover to whatever new stable state they might achieve (Frank et al. 2005; Worm et al. 2006; Overholtz and Link 2007)"	Discussion	No	H.T. Harvey and Associates	No	0	5.8
5	Other	3-5	2010	No	2	Male	USA	No	No	Yes	No	No	1	No	Yes	No	Ainley, D. G. and K. D. Hyrenbach. 2010. Top-down and bottom-up factors affecting seabird population trends in the California current system (1985-2006). Progress in Oceanography 84:242-254.	Yes	Progress in Oceanography	Oceanography	USA	"Concurrently, the system has experienced the depletion of major trophic groups (e.g., rockfishes, sharks) due to over-fishing (Jackson et al., 2001; Worm et al., 2006; Heithaus et al., 2008)"	Intro	No	H.T. Harvey and Associates	No	0	3.142
6	Ecology	>5	2012	No	5	Male	USA	Yes	Yes	Yes	No	No	1	No	No	Yes	Ainsworth, C. H., H. N. Morzaria-Luna, I. C. Kaplan, P. S. Levin, and E. A. Fulton. 2012. Full compliance with harvest regulations yields ecological benefits: Northern Gulf of California case study. Journal of Applied Ecology 49:63-72.	Yes	Journal of Applied Ecology	Ecology	USA	"There is little question that declining integrity of marine ecosystems is eroding the ability of these systems to provide the goods and services that humans need (Worm et al. 2006)"	Intro	No	Marine Resources Assessment Group (MRAG) Americas Inc	No	0	5.045
7	Ecology	2-3	2010	No	5	Male	Europe	No	Yes	Yes	No	No	1	No	No	Yes	Albouy, C., D. Mouillot, D. Rocklin, J. M. Culioli, and F. Le Loc'h. 2010. Simulation of the combined effects of artisanal and recreational fisheries on a Mediterranean MPA ecosystem using a trophic model. Marine Ecology-Progress Series 412:207-221.	Yes	Marine Ecology-Progress Series	Ecology	France	"Exploitation can cause major changes in biological assemblages and, ultimately, biodiversity loss that may disrupt the way the ecosystem functions and alter the sustainability of the goods and services provided by marine ecosystems (Lotze et al. 2006, Worm et al. 2006)"	Intro	No	Université Montpellier, IFREMER	No	0	2.711
8	Policy	0-2	2010	Yes	9	Female	Other	Yes	Yes	Yes	No	No	1	No	No	No	Alder, J., S. Cullis-Suzuki, V. Karpouzi, K. Kaschner, S. Mondoux, W. Swartz, P. Trujillo, R. Watson, and D. Pauly. 2010. Aggregate performance in managing marine ecosystems of 53 maritime countries. Marine Policy 34:468-476.	Yes	Marine Policy	Policy	Kenya	"There are increasing public concerns about the environmental impact of fisheries [1,2]"	Intro	No	United Nations Environment Programme	No	1	1.865
9	Multidisciplinary	3-5	2012	No	6	Female	Europe	Yes	Yes	Yes	No	No	1	No	No	No	Alexander, K. A., R. Janssen, G. Arciniegas, T. G. O'Higgins, T. Eikelboom, and T. A. Wilding. 2012. Interactive Marine Spatial Planning: Siting Tidal Energy Arrays around the Mull of Kintyre. Plos One 7.	Yes	PLoS One	Multidisciplinary	United Kingdom	"Continuing decline in the environmental quality of many of the world’s oceans as a consequence of human activities [1,2,3]"	Intro	No	Scottish Marine Institute	No	0	4.092
10	Fisheries	>5	2009	No	14	Female	USA	No	Yes	Yes	No	No	1	No	No	Yes	Alexander, K. E., W. B. Leavenworth, J. Cournane, A. B. Cooper, S. Claesson, S. Brennan, G. Smith, L. Rains, K. Magness, R. Dunn, T. K. Law, R. Gee, W. J. Bolster, and A. A. Rosenberg. 2009. Gulf of Maine cod in 1861: historical analysis of fishery logbooks, with ecosystem implications. Fish and Fisheries 10:428-449.	Yes	Fish and Fisheries	Fisheries	USA	"Conceptually, this focuses on the ecosystem’s ability to provide a full suite of services to support human well-being (UN Millennium Ecosystem Assessment (2005–2008), McLeod et al. 2005– 2008). To do that, it must be healthy and resilient (Worm et al. 2006)."	Intro	No	University of New Hampshire	No	0	5.8
11	Multidisciplinary	>5	2009	No	3	Male	USA	Yes	Yes	Yes	No	No	1	No	Yes	Yes	Allesina, S., A. Bodini, and M. Pascual. 2009. Functional links and robustness in food webs. Philosophical Transactions of the Royal Society B-Biological Sciences 364:1701-1709.	Yes	Philosophical Transactions of the Royal Society B	Multidisciplinary	USA	"Understanding and predicting how the structure of ecological networks influences extinction patterns is crucial at this time of rapid loss in biodiversity and associated ecosystems’ services (Loreau et al. 2001; Raffaelli 2004; Worm et al. 2006)"	Intro	No	University of Michigan	No	0	6.401
12	Biology	>5	2009	No	2	Male	USA	Yes	Yes	Yes	No	No	1	No	Yes	Yes	Allesina, S. and M. Pascual. 2009. Googling Food Webs: Can an Eigenvector Measure Species' Importance for Coextinctions? Plos Computational Biology 5.	Yes	Plos Computational Biology	Biology	USA	"The robustness of ecosystems to species losses is a central question in ecology given the current pace of extinctions and the many species threatened by human impacts [1–3]."	Intro	No	National Center for Ecological Analysis and Synthesis	No	0	5.215
13	Multidisciplinary	3-5	2012	Yes	10	Male	USA	Yes	Yes	Yes	No	No	1	No	No	Yes	Allnutt, T. F., T. R. McClanahan, S. Andrefouet, M. Baker, E. Lagabrielle, C. McClennen, A. J. M. Rakotomanjaka, T. F. Tianarisoa, R. Watson, and C. Kremen. 2012. Comparison of Marine Spatial Planning Methods in Madagascar Demonstrates Value of Alternative Approaches. Plos One 7.	Yes	PLoS One	Multidisciplinary	USA	"While climate change, overfishing and land use change negatively impact the biodiversity and ecological function of marine ecosystems worldwide [1,2]"	Intro	No	University of California, Berkeley	No	1	4.092
14	Ecology	3-5	2008	No	1	Male	USA	No	Yes	Yes	Yes	No	5	No	No	Yes	Altieri, A. H. 2008. DEAD ZONES ENHANCE KEY FISHERIES SPECIES BY PROVIDING PREDATION REFUGE. Ecology 89:2808-2818.	Yes	Ecology	Ecology	USA	Habitat degradation is commonly characterized by downward trends in biodiversity and ecosystem functions including biological productivity, economic output, and ecosystem stability (Soule 1991, Vitousek 1994, Jackson et al. 2001, Lotze et al. 2006, Worm et al. 2006). // Aside from noting blooms of noxious and/or invasive species however (Vitousek 1994, Jackson et al. 2001, Lotze et al. 2006, Worm…	Intro / Discussion	No	Brown University	No	0	4.849
15	Ecology	3-5	2012	No	5	Male	USA	No	No	No	Yes	No	2	No	Yes	No	Altieri, A. H., M. D. Bertness, T. C. Coverdale, N. C. Herrmann, and C. Angelini. 2012. A trophic cascade triggers collapse of a salt-marsh ecosystem with intensive recreational fishing. Ecology 93:1402-1410.	Yes	Ecology	Ecology	USA	and it supports an emerging perspective that predator depletion can lead to rapid collapse of coastal ecosystems and the services they provide (Worm et al. 2006) // and the cascading effects of overexploitation are increasingly implicated in the loss and degradation of marine ecosystems around the world, including kelp forests, open oceans, coral reefs, and soft-sediment estuaries (Jackson et al.…	Discussion	No	Brown University	No	0	4.849
16	Ecology	>5	2011	No	8	Female	USA	No	Yes	Yes	No	No	1	No	Yes	No	Altman, I., A. M. H. Blakeslee, G. C. Osio, C. B. Rillahan, S. J. Teck, J. J. Meyer, J. E. Byers, and A. A. Rosenberg. 2011. A practical approach to implementation of ecosystem-based management: a case study using the Gulf of Maine marine ecosystem. Frontiers in Ecology and the Environment 9:183-189.	Yes	Frontiers in Ecology and the Environment	Ecology	USA	Increases in human activity in coastal and marine environments have led to substantial degradation in the ecological health of these systems. As a result, their continued production of ecosystem services is currently threatened (Lotze et al. 2006; Worm et al. 2006).	Intro	No	University of New Hampshire	No	0	9.113
17	Other	0-2	2010	No	2	Female	USA	No	No	Yes	No	No	1	Yes	Yes	No	Andreatta, S. and A. Parlier. 2010. The Political Ecology of Small-Scale Commercial Fishermen in Carteret County, North Carolina. Human Organization 69:180-191.	Yes	Human Organization	Anthropology	USA	recent research by biologists and fisheries experts alarmed the public with warnings of possible global collapse of fisheries by 2048 (Worm et al. 2006)	Intro	No	University of North Carolina	No	0	0.557
18	Fisheries	0-2	2011	No	2	Male	Other	No	No	Yes	No	No	1	No	No	No	Angelini, R. and F. Vaz-Velho. 2011. Ecosystem structure and trophic analysis of Angolan fishery landings. Scientia Marina 75:309-319.	Yes	Scientia Marina	Fisheries	Brazil	Internationally too, there are ongoing efforts to develop a more holistic ecosystem-based approach to resource management, with the objective of providing a basis for implementing effective multispecies fisheries management (Griffis and Kimball, 1996; Caddy and Cochrane, 2001; Worm et al., 2006).	Intro	No	Universidade Federal do Rio Grande do Norte	No	0	1.278
19	Other	3-5	2012	No	1	Female	Europe	No	Yes	Yes	No	No	1	No	No	No	Apitz, S. E. 2012. Conceptualizing the role of sediment in sustaining ecosystem services: Sediment-ecosystem regional assessment (SEcoRA). Science of the Total Environment 415:9-30.	Yes	Science of the Total Environment	Other	United Kingdom	sectoral management of the environment in support of one ecosystem service, such as agriculture, fishing (Worm et al., 2006), dredging, forestry (Wall, 2004), etc., can negatively affect other services, either in that system, or in other connected systems	Intro	No	SEA Environmental Decisions	No	0	3.286
20	Multidisciplinary	3-5	2011	No	3	Female	Europe	No	No	Yes	No	No	2	No	No	No	Ardura, A., S. Planes, and E. Garcia-Vazquez. 2011. Beyond Biodiversity: Fish Metagenomes. Plos One 6.	Yes	PLoS One	Multidisciplinary	Spain	Fisheries have been identified as one of the main causes for the loss of animal genetic diversity [13] // Fisheries overexploitation could be a possible cause of apparently reduced genetic diversity in the Amazonian catch [13], although likely not the only one	Intro	No	University of Oviedo	No	0	4.092
21	Conservation	2-3	2012	No	5	Male	Other	No	No	Yes	No	No	1	No	No	Yes	Arias-Gonzalez, J. E., G. Acosta-Gonzalez, N. Membrillo, J. R. Garza-Perez, and J. M. Castro-Perez. 2012. Predicting spatially explicit coral reef fish abundance, richness and Shannon-Weaver index from habitat characteristics. Biodiversity and Conservation 21:115-130.	Yes	Biodiversity and Conservation	Conservation	Mexico	Recently, biodiversity has been positively related with genetic pools, and ecosystem functioning and services (Worm et al. 2006; Naeem et al. 2009; Perrings et al. 2010)	Intro	No	Centro de Investigacio´n y Estudios Avanzados del I.P.N-Unidad Me´rida	No	0	2.238
22	Other	2-3	2010	No	5	Female	Europe	No	Yes	Yes	No	No	1	No	No	Yes	Arnaud-Haond, S., N. Marba, E. Diaz-Almela, E. A. Serrao, and C. M. Duarte. 2010. Comparative Analysis of Stability-Genetic Diversity in Seagrass (Posidonia oceanica) Meadows Yields Unexpected Results. Estuaries and Coasts 33:878-889.	Yes	Estuaries and Coasts	Other	Portugal	The relationship between diversity and stability has been the subject of a long-standing debate in ecology. [text omitted] Depending on the study and the proxies measured, various trends or lack of trends have been observed (Johnson et al. 1996; Loreau et al. 2001; Pfisterer and Schmid 2002; Worm et al. 2006).	Intro	No	University Algarve	No	0	2.109
23	Policy	>5	2011	No	2	Male	Europe	No	No	No	Yes	No	1	No	Yes	No	Arthur, R. I. and R. M. Friend. 2011. Inland capture fisheries in the Mekong and their place and potential within food-led regional development. Global Environmental Change-Human and Policy Dimensions 21:219-226.	Yes	Global Environmental Change-Human and Policy Dimensions	Policy	United Kingdom	As with global debates on fisheries and development (e.g., Worm et al., 2006; World Bank, 2004), within regional development debates capture fisheries often appear as doomed under almost any circumstances (Friend et al., 2009; Bush and Hirsch, 2005).	Discussion	No	MRAG Ltd	No	0	6.868
24	Biology	0-2	2011	No	15	Male	Europe	No	Yes	Yes	No	No	1	No	No	Yes	Arvanitidis, C., S. Faulwetter, G. Chatzigeorgiou, L. Penev, O. Banki, T. Dailianis, E. Pafilis, M. Kouratoras, E. Chatzinikolaou, L. Fanini, A. Vasileiadou, C. Pavloudi, P. Vavilis, P. Koulouri, and C. Dounas. 2011. Engaging the broader community in biodiversity research: the concept of the COMBER pilot project for divers in ViBRANT. Zookeys:211-229.	Yes	Zookeys	Biology	Greece	The extent to which changes in biodiversity may induce reduction of ecosystem performance and of its potential to provide humankind with products and services still remains the focus of much scientific effort (Worm et al. 2006).	Intro	No	Hellenic Centre for Marine Research	No	0	0.879
25	Policy	0-2	2012	Yes	11	Male	USA	No	No	Yes	No	No	1	No	No	Yes	Aswani, S., P. Christie, N. A. Muthiga, R. Mahon, J. H. Primavera, L. A. Cramer, E. B. Barbier, E. F. Granek, C. J. Kennedy, E. Wolanski, and S. Hacker. 2012. The way forward with ecosystem-based management in tropical contexts: Reconciling with existing management systems. Marine Policy 36:1-10.	Yes	Marine Policy	Policy	USA	Further-more, centralized state-sponsored EBM plans often focus on protecting biodiversity, which, while important for sustaining and fostering ecological services [13]	Intro	No	University of California, Santa Barbara	No	1	1.865
26	Other	2-3	2009	No	4	Male	Canada	No	No	No	Yes	No	1	Yes	Yes	Yes	Ayer, N., R. P. Cote, P. H. Tyedmers, and J. H. M. Willison. 2009. Sustainability of seafood production and consumption: an introduction to the special issue. Journal of Cleaner Production 17:321-324.	Yes	Journal of Cleaner Production	Other	Canada	In a subsequent paper [6] the consequences for ecosystems were more clearly spelled out: ‘‘We conclude that marine biodiversity loss is increasingly impairing the ocean’s capacity to provide food, maintain water quality, and recover from perturbations.’’ By extrapolation using huge sets of data they concluded that all marine fisheries on which we currently rely for much of our seafood will have c…	Discussion	No	Dalhousie University	No	0	2.727
27	Multidisciplinary	>5	2009	No	2	Male	Europe	No	No	No	Yes	No	1	No	Yes	No	Balata, D. and S. Mariani. 2009. Culling Whales: Ethically and Ecologically Wrong. Science 324:464-464.	Yes	Science	Multidisciplinary	Ireland	Recent studies have shown the dramatic consequences of biodiversity loss in the oceans and its ripple effects on trophic webs (1–3). Such dramatic changes have occurred as a by-product of unsustainable fisheries management	Discussion	No	University College Dublin	No	0	32.452
28	Other	0-2	2011	No	7	Male	Europe	No	No	No	Yes	No	1	No	Yes	No	Balmford, A., B. Fisher, R. E. Green, R. Naidoo, B. Strassburg, R. K. Turner, and A. S. L. Rodrigues. 2011. Bringing Ecosystem Services into the Real World: An Operational Framework for Assessing the Economic Consequences of Losing Wild Nature. Environmental & Resource Economics 48:161-175.	Yes	Environmental & Resource Economics	Economics	United Kingdom	For example, there is now some information on the conditions that trigger collapse in marine fisheries (Worm et al. 2006)	Discussion	No	University of Cambridge	No	0	1.523
29	Conservation	0-2	2012	No	8	Female	Other	Yes	Yes	Yes	No	No	1	No	No	No	Ban, N. C., J. E. Cinner, V. M. Adams, M. Mills, G. R. Almany, S. S. Ban, L. J. McCook, and A. White. 2012. Recasting shortfalls of marine protected areas as opportunities through adaptive management. Aquatic Conservation-Marine and Freshwater Ecosystems 22:262-271.	Yes	Aquatic Conservation-Marine and Freshwater Ecosystems	Conservation	Australia	Severe declines in marine systems mean that we face the prospect of losing species and entire ecosystems within a single generation (Rogers and Laffoley, 2011) and effective management of marine environments is urgently needed (Sala and Knowlton, 2006; Worm et al., 2006).	Intro	No	James Cook University	No	0	1.929
30	Ecology	2-3	2008	No	3	Female	Canada	Yes	Yes	Yes	No	No	1	No	Yes	No	Ban, N. C., C. Picard, and A. C. J. Vincent. 2008. Moving Toward Spatial Solutions in Marine Conservation with Indigenous Communities. Ecology and Society 13.	Yes	Ecology and Society	Ecology	Canada	Marine protected areas (MPA) can be a valuable conservation tool to halt the decline of overexploited fish and invertebrate populations (Kelleher and Kenchington 1992, Walters 1998, Dayton et al. 2000, Halpern and Warner 2002, Worm et al. 2006)	Intro	No	University of British Columbia	No	0	2.516
31	Multidisciplinary	3-5	2009	No	2	Female	Canada	Yes	Yes	Yes	No	No	1	No	Yes	No	Ban, N. C. and A. C. J. Vincent. 2009. Beyond Marine Reserves: Exploring the Approach of Selecting Areas where Fishing Is Permitted, Rather than Prohibited. Plos One 4.	Yes	PLoS One	Multidisciplinary	Canada	The oceans have suffered declines in faunal biomass and biodiversity [1,2,3]	Intro	No	University of British Columbia	No	0	4.092
32	Other	2-3	2010	No	3	Female	Europe	No	Yes	Yes	No	No	2	Yes	Yes	No	Banaru, D., M. Harmelin-Vivien, and C. F. Boudouresque. 2010. Man induced change in community control in the north-western Black Sea: The top-down bottom-up balance. Marine Environmental Research 69:262-275.	Yes	Marine Environmental Research	Other	France	Some authors have predicted ‘‘the global collapse of all taxa currently fished” by 2048 (Worm et al., 2006). // The two scientists representing these opposing camps, Hilborn (2006) and Worm et al., (2006), argued for a long time on the fisheries and ecosystems management thematic, as each of them were defending their own expertise area.	Intro	No	Centre d’Océanologie de Marseille DIMAR, UMR CNRS	No	0	2.276
33	Biology	0-2	2007	No	1	Male	USA	No	No	No	Yes	No	1	No	Yes	No	Banse, K. 2007. Do we live in a largely top-down regulated world ? Journal of Biosciences 32:791-796.	Yes	Journal of Biosciences	Biology	USA	By 2003, for 5/6 of the global catch, 3/10 (29%) of the fi shed species yielded ≤ 1/10 of the highest catches recorded since 1950 (Worm et al 2006), which in many regions was long after the onset of intensive fishing.	Discussion	No	University of Washington	No	0	1.648
34	Fisheries	0-2	2011	No	5	Male	Europe	No	Yes	Yes	No	No	1	No	Yes	No	Barausse, A., A. Michieli, E. Riginella, L. Palmeri, and C. Mazzoldi. 2011. Long-term changes in community composition and life-history traits in a highly exploited basin (northern Adriatic Sea): the role of environment and anthropogenic pressures. Journal of Fish Biology 79:1453-1486.	Yes	Journal of Fish Biology	Fisheries	Italy	It is only recently, however, that the consequences of exploitation are becoming clear, with drastic effects on socio-economic systems (Worm et al., 2006).	Intro	No	University of Padova	No	0	1.685
35	Other	0-2	2010	Yes	1	Male	USA	No	No	No	Yes	No	1	No	No	No	Barbier, E. B. 2010. Poverty, development, and environment. Environment and Development Economics 15:635-660.	Yes	Environment and Development Economics	Economics	USA	Coral reefs are another critical habitat throughout the developing world that both support near-shore fisheries harvested by poor coastal communities and provide valuable shoreline protection (Moberg and Folke, 1999; Cesar, 2000; Jackson et al., 2001; Moberg and önnbäck, 2003; Chong, 2005; Worm et al., 2006)	Discussion	No	University of Wyoming	Yes	1	0.671
36	Ecology	>5	2011	Yes	6	Male	USA	Yes	Yes	Yes	No	No	2	No	Yes	Yes	Barbier, E. B., S. D. Hacker, C. Kennedy, E. W. Koch, A. C. Stier, and B. R. Silliman. 2011. The value of estuarine and coastal ecosystem services. Ecological Monographs 81:169-193.	Yes	Ecological Monographs	Ecology	USA	Estuarine and coastal ecosystems (ECEs) are some of the most heavily used and threatened natural systems globally (Lotze et al. 2006, Worm et al. 2006, Halpern et al. 2008). // This global decrease in ECEs is known to affect at least three critical ecosystem services Worm et al. 2006): the number of viable (noncollapsed) fisheries (33% decline); the provision of nursery habitats such as oyster re…	Intro	No	University of Wyoming	Yes	1	7.433
37	Ecology	2-3	2012	No	4	Male	Europe	No	No	No	Yes	No	1	No	No	No	Barbone, E., I. Rosati, S. Reizopoulou, and A. Basset. 2012. Linking classification boundaries to sources of natural variability in transitional waters: A case study of benthic macroinvertebrates. Ecological Indicators 12:105-122.	Yes	Ecological Indicators	Ecology	Italy	Reference conditions, defined as the ecological status of an ecosystem in the absence of human disturbance or alteration (Stoddard et al., 2006), are very unlikely to occur in transitional and coastal aquatic ecosystems (Millennium Ecosystem Assessment, 2005; Worm et al., 2006; Halpern et al., 2008).	Discussion	No	Apulian Regional Environmental Protection Agency (ARPA Puglia)	No	0	2.695
38	Multidisciplinary	>5	2010	No	1	Female	USA	No	No	No	Yes	No	1	No	Yes	No	Baron, N. 2010. Stand up for science. Nature 468:1032-1033.	Yes	Nature	Multidisciplinary	USA	Boris Worm, a marine ecologist from Dalhousie University in Halifax, Canada, for example, faced critiques that he had ‘overreached’ his results in two papers [6,7] about fish depletion that got a lot of public attention.	Discussion	No	National Center for Ecological Analysis and Synthesis	No	0	36.28
39	Fisheries	None	2007	No	1	Female	USA	No	Yes	Yes	No	No	1	No	No	Yes	Baskett, M. L. 2007. Simple fisheries and marine reserve models of interacting species: An overview and example with recruitment facilitation. California Cooperative Oceanic Fisheries Investigations Reports 48:71-81.	Yes	California Cooperative Oceanic Fisheries Investigations Reports	Fisheries	USA	In general, interspecific biodiversity is vital to marine ecosystem functional properties, such as productivity and stability (Worm et al. 2006).	Intro	No	National Center for Ecological Analysis and Synthesis	No	0	None
40	Biology	2-3	2010	No	5	Male	Europe	No	No	Yes	No	No	1	No	No	No	Beare, D., F. Holker, G. H. Engelhard, E. McKenzie, and D. G. Reid. 2010. An unintended experiment in fisheries science: a marine area protected by war results in Mexican waves in fish numbers-at-age. Naturwissenschaften 97:797-808.	Yes	Naturwissenschaften	Biology	Italy	In open, temperate marine regions where dispersal potential and gene flow in fish are higher, there remains much debate over whether MPAs will be effective measures for conservation at all (Hilborn et al. 2004; Worm et al. 2006; Blyth-Skyrme et al. 2006; Laurel and Bradbury 2006; Hölker et al. 2007)	Intro	No	European Commission	No	0	2.278
41	Conservation	0-2	2010	No	6	Male	Europe	No	No	No	Yes	No	1	No	Yes	No	Bearzi, G., S. Agazzi, J. Gonzalvo, S. Bonizzoni, M. Costa, and A. Petroselli. 2010. Biomass removal by dolphins and fisheries in a Mediterranean Sea coastal area: do dolphins have an ecological impact on fisheries? Aquatic Conservation-Marine and Freshwater Ecosystems 20:549-559.	Yes	Aquatic Conservation-Marine and Freshwater Ecosystems	Conservation	Italy	Excessive fishing pressure and the resulting worldwide decline in fish stocks and loss of marine biodiversity is a growing concern (Pauly et al., 1998, 2002; Jackson et al., 2001; Worm et al., 2006).	Discussion	No	Tethys Research Institute	No	0	1.929
42	Other	3-5	2009	No	3	Male	Europe	No	No	No	Yes	No	1	No	Yes	No	Bearzi, G., C. M. Fortuna, and R. R. Reeves. 2009. Ecology and conservation of common bottlenose dolphins Tursiops truncatus in the Mediterranean Sea. Mammal Review 39:92-123.	Yes	Mammal Review	Other	Italy	Excessive fishing pressure and the resulting worldwide decline in fish stocks and loss of marine biodiversity is a growing concern worldwide (Pauly et al., 1998, 2002; Jackson et al., 2001; Pitcher, 2001; Csirke, 2005; Worm et al., 2006).	Discussion	No	Tethys Research Institute	No	0	3.034
43	Multidisciplinary	>5	2010	No	3	Male	Europe	No	No	No	Yes	No	2	No	Yes	Yes	Beaugrand, G., M. Edwards, and L. Legendre. 2010. Marine biodiversity, ecosystem functioning, and carbon cycles. Proceedings of the National Academy of Sciences of the United States of America 107:10120-10124.	Yes	Proceedings of the National Academy of Sciences of the United States of America	Multidisciplinary	France	Ecologists often see the biodiversity of an ecosystem as beneficial in terms of resilience, stability, and ecosystem services (33) //However, the relationship between temperature, planktonic biodiversity, and fish is far more complex than described here because of their synergistic pressures such as overfishing, which exerts a significant control on the biomass of the spawning stocks of exploited…	Discussion	No	Université des Sciences et Technologies de Lille	No	0	9.681
44	Other	2-3	2007	Yes	14	Female	Europe	No	No	Yes	No	No	1	No	No	Yes	Beaumont, N. J., M. C. Austen, J. P. Atkins, D. Burdon, S. Degraer, T. P. Dentinho, S. Derous, P. Holm, T. Horton, E. van Ierland, A. H. Marboe, D. J. Starkey, M. Townsend, and T. Zarzycki. 2007. Identification, definition and quantification of goods and services provided by marine biodiversity: Implications for the ecosystem approach. Marine Pollution Bulletin 54:253-265.	Yes	Marine Pollution Bulletin	Other	United Kingdom	The provision of all the goods and services is linked to biodiversity, although the exact mechanism and quantification of this linkage is not discussed in this paper; further information on these linkages have been documented by Beaumont et al. (2006), Worm et al. 2006) and Balvanera et al. (2006).	Intro	No	Plymouth Marine Laboratory	Yes	1	2.503
45	Other	2-3	2008	Yes	4	Female	Europe	No	No	No	No	No	3	No	Yes	Yes	Beaumont, N. J., M. C. Austen, S. C. Mangi, and M. Townsend. 2008. Economic valuation for the conservation of marine biodiversity. Marine Pollution Bulletin 56:386-396.	Yes	Marine Pollution Bulletin	Other	United Kingdom	The role of marine biodiversity in the provision of ecosystem goods and services remains the subject of considerable debate (Wall, 2004; Worm et al., 2006; Balvanera et al., 2006). // We have examined evidence for linkages framed around an assumption of declining biodiversity as previous studies have implied that marine biodiversity is more likely to decline in the future (Millenium Ecosystem Ass…	Methods / Results	Yes	Plymouth Marine Laboratory	Yes	1	2.503
46	Other	0-2	2009	No	3	Male	USA	No	No	No	Yes	No	1	No	Yes	No	Becker, B. H., D. T. Press, and S. G. Allen. 2009. Modeling the effects of El Nino, density-dependence, and disturbance on harbor seal (Phoca vitulina) counts in Drakes Estero, California: 1997-2007. Marine Mammal Science 25:1-18.	Yes	Marine Mammal Science	Other	USA	Such conflicts may increase in the future if mariculture replaces wild ocean harvesting due to the worldwide decline in wild fish stocks (Worm et al. 2006).	Discussion	No	Pacific Coast Science and Learning Center	No	0	1.611
47	Other	3-5	2011	No	3	Male	Europe	Yes	Yes	Yes	No	No	1	No	No	Yes	Behl, S., A. Donval, and H. Stibor. 2011. The relative importance of species diversity and functional group diversity on carbon uptake in phytoplankton communities. Limnology and Oceanography 56:683-694.	Yes	Limnology and Oceanography	Oceanography	Germany	During the last decade concern has been growing that biodiversity is declining from the local to global scale, which may affect resource sustainability, ecosystem functioning, and human welfare (Cardinale et al. 2006; Worm et al. 2006; Brauman et al. 2007).	Intro	No	Ludwig-Maximilians-Universita¨t Mu¨nchen	No	0	3.416
48	Other	2-3	2010	No	5	Male	Canada	Yes	Yes	Yes	No	No	2	No	No	Yes	Belley, R., P. Archambault, B. Sundby, F. Gilbert, and J. M. Gagnon. 2010. Effects of hypoxia on benthic macrofauna and bioturbation in the Estuary and Gulf of St. Lawrence, Canada. Continental Shelf Research 30:1302-1313.	Yes	Continental Shelf Research	Other	Canada	Many marine habitats are under pressure from multiple anthropogenic threats such as fishing, pollution, coastal development, and global warming, all of which can lead to a loss of marine biodiversity (Snelgrove, 1998;Snelgrove et al., 2000; Worm et al., 2006). // Loss of macrobenthic biodiversity will likely have negative effects on the functions, processes, and health of ecosystems (Snelgrove, 1…	Intro	No	Institut des sciences delamerde Rimouski	No	0	2.088
49	Multidisciplinary	>5	2009	No	4	Male	Europe	No	No	No	Yes	No	1	No	No	Yes	Benayas, J. M. R., A. C. Newton, A. Diaz, and J. M. Bullock. 2009. Enhancement of Biodiversity and Ecosystem Services by Ecological Restoration: A Meta-Analysis. Science 325:1121-1124.	Yes	Science	Multidisciplinary	Spain	The relation between biodiversity and provision of ecosystem services is still poorly defined (10, 17).	Discussion	No	Alcala University	No	0	32.452
50	Multidisciplinary	3-5	2010	No	16	Male	Europe	No	Yes	Yes	No	No	1	No	No	Yes	Benedetti-Cecchi, L., K. Iken, B. Konar, J. Cruz-Motta, A. Knowlton, G. Pohle, A. Castelli, L. Tamburello, A. Mead, T. Trott, P. Miloslavich, M. Wong, Y. Shirayama, C. Lardicci, G. Palomo, and E. Maggi. 2010. Spatial Relationships between Polychaete Assemblages and Environmental Variables over Broad Geographical Scales. Plos One 5.	Yes	PLoS One	Multidisciplinary	Italy	Explaining the causes of variation in biodiversity at multiple spatial scales is a major goal of ecology. The ability to relate these fluctuations to changes in environmental drivers is becoming increasingly important to understand the consequences of human domination of the biosphere [1–3].	Intro	No	University of Pisa	No	0	4.092
51	Biology	2-3	2012	No	6	Male	Europe	Yes	Yes	Yes	No	No	1	No	No	Yes	Benedetti-Cecchi, L., L. Tamburello, F. Bulleri, E. Maggi, V. Gennusa, and M. Miller. 2012. Linking patterns and processes across scales: the application of scale-transition theory to algal dynamics on rocky shores. Journal of Experimental Biology 215:977-985.	Yes	Journal of Experimental Biology	Biology	Italy	Concerns about the ecological and societal consequences of the continuing loss of biodiversity have motivated the analysis of diversity patterns at regional and global scales, in relation to potentially important environmental drivers (e.g. air and seasurface temperature, CO2 and nutrient concentrations) (Lotze et al., 2006; Worm et al., 2006; Halpern et al., 2008).	Intro	No	University of Pisa	No	0	2.996
52	Other	2-3	2009	No	2	Male	Europe	No	No	No	Yes	No	1	No	Yes	No	Bere, E. and J. Brug. 2009. Towards health-promoting and environmentally friendly regional diets - a Nordic example. Public Health Nutrition 12:91-96.	Yes	Public Health Nutrition	Other	Norway	Similarly to game, several of the oceans’ fish stocks have now collapsed, and the future harvest depends heavily on how the remaining stocks are and will be treated(47–49).	Discussion	No	University of Agder	No	0	2.169
53	Ecology	2-3	2010	No	9	Male	Europe	No	No	Yes	No	No	1	No	No	Yes	Bertocci, I., F. Arenas, M. Matias, S. Vaselli, R. Araujo, H. Abreu, R. Pereira, R. Vieira, and I. Sousa-Pinto. 2010. Canopy-forming species mediate the effects of disturbance on macroalgal assemblages on Portuguese rocky shores. Marine Ecology-Progress Series 414:107-116.	Yes	Marine Ecology-Progress Series	Ecology	Portugal	Additionally, most marine studies examining the diversity–stability hypothesis were carried out in the context of biological invasions, with few attempts to evaluate how versity shapes the ability of communities to resist perturbations. These include specific studies on [...omitted...] and microalgal biomass and combinations of sediment types and varying temperatures (Worm et al. 2006).	Intro	No	1CIIMAR, Centro Interdisciplinar de Investigação Marinha e Ambiental	No	0	2.711
54	Policy	0-2	2010	No	1	Male	Other	No	Yes	Yes	No	No	1	No	No	Yes	Bess, R. 2010. Maintaining a balance between resource utilisation and protection of the marine environment in New Zealand. Marine Policy 34:690-698.	Yes	Marine Policy	Policy	New Zealand	Utilisation pressures have already degraded some sensitive biological and ecological areas, which have impaired the oceans’ ability to produce the goods and services that are essential for sustaining life [2].	Intro	No	Ministry of Fisheries	No	0	1.865
55	Other	2-3	2009	No	3	Female	Europe	No	Yes	Yes	No	No	1	No	No	Yes	Bianconi, G., L. Ferretti, and S. Franz. 2009. Non-neutral theory of biodiversity. EPL 87: 28001	Yes	EPL	Other	Italy	In fact many ecosystems recently, undergo a loss of biodiversity [1,2]	Intro	No	The Abdus Salam International Center for Theoretical Physics	No	0	2.171
56	Policy	0-2	2010	No	1	Female	USA	No	Yes	Yes	Yes	No	3	No	No	No	Bischof, B. G. 2010. Negotiating uncertainty Framing attitudes, prioritizing issues, and finding consensus in the coral reef environment management "crisis". Ocean & Coastal Management 53:597-614.	Yes	Ocean & Coastal Management	Policy	USA	These “rain forests of the sea” are said to be suffering the greatest rates of marine environmental deterioration in the face of global change, particularly those located near opulation centers and areas of intensive coastal development or when easily accessible to a variety of resource exploitation efforts, such as fishing and tourism [4-7]. // Prospects voiced by scientists are increasingly pes…	Intro / Discussion	No	Florida State University	No	0	1.333
57	Other	0-2	2009	No	1	Male	USA	No	No	Yes	No	No	1	Yes	Yes	No	Blackford, M. G. 2009. Fishers, Fishing, and Overfishing: American Experiences in Global Perspective, 1976-2006. Business History Review 83:239-266.	Yes	Business History Review	Other	USA	Authors of additional scientific reports advanced arguments similar to Safina's, attributing declines in fish stocks to greatly intensified fishing efforts. The most critical confirmation of the situation appeared in a far-reaching article published in Science, in the fall of 2006, by a group of twelve Canadian, American, and European scientists. By 2003, they contended, 29 percent of the world's…	Intro	No	Ohio State University	No	0	0.444
58	Conservation	0-2	2007	No	1	Male	USA	No	No	Yes	Yes	No	3	Yes	Yes	Yes	Blick, J. P. 2007. Pre-Columbian impact on terrestrial, intertidal, and marine resources, San Salvador, Bahamas (AD 950-1500). Journal for Nature Conservation 15:174-183.	Yes	Journal for Nature Conservation	Conservation	USA	Concerns about marine resource exploitation and fishing pressure, including overfishing, have increased in recent years. Characteristics of overfishing include: depletion of apex predators and larger individuals; truncated size and age distributions of targeted species (‘‘growth overfishing,’’ see Fonteneau, 2004, p. 1); genetic changes in somatic growth rates; declining fisheries biomass; altere…	Intro / Discussion	No	Georgia College and State University	No	0	1.864
59	Other	3-5	2010	No	8	Female	Europe	No	No	Yes	No	No	1	No	Yes	No	Bohne-Kjersem, A., N. Bache, S. Meier, G. Nyhammer, P. Roepstorff, O. Saele, A. Goksoyr, and B. E. Grosvik. 2010. Biomarker candidate discovery in Atlantic cod (Gadus morhua) continuously exposed to North Sea produced water from egg to fry. Aquatic Toxicology 96:280-289.	Yes	Aquatic Toxicology	Other	Norway	In many coastal ecosystems cod fish and other marine vertebrates are functionally or entirely extinct. Overfishing is believed to be the main reason for this (Worm et al., 2006)	Intro	No	University of Bergen	No	0	3.761
60	Other	None	2008	No	1	Female	USA	No	No	Yes	No	No	1	Yes	Yes	No	Boorse, D. 2008. CREATION CARE: RELIGION AND ENVIRONMENTAL ACTION. Review of Faith & International Affairs 6:33-37.	Yes	Review of Faith & International Affairs	Other	USA	(Worm et al. 2006) predict that unless we dramatically change the way ocean fisheries are treated, 100 percent of the world’s large commercial fisheries will collapse within 50 years	Intro	No	Gordon College in Wenham	No	0	None
61	Multidisciplinary	>5	2009	No	4	Female	USA	No	No	Yes	No	No	1	No	No	Yes	Borer, E. T., C. E. Mitchell, A. G. Power, and E. W. Seabloom. 2009. Consumers indirectly increase infection risk in grassland food webs. Proceedings of the National Academy of Sciences of the United States of America 106:503-506.	Yes	Proceedings of the National Academy of Sciences of the United States of America	Multidisciplinary	USA	Although altered consumer communities are known to impact biodiversity, ecosystem productivity, and stability and facilitate further biological invasions (4, 5)	Intro	No	Oregon State University	No	0	9.681
62	Fisheries	2-3	2009	No	9	Male	USA	No	Yes	Yes	Yes	No	2	Yes	Yes	No	Botsford, L. W., D. R. Brumbaugh, C. Grimes, J. B. Kellner, J. Largier, M. R. O'Farrell, S. Ralston, E. Soulanille, and V. Wespestad. 2009. Connectivity, sustainability, and yield: bridging the gap between conventional fisheries management and marine protected areas. Reviews in Fish Biology and Fisheries 19:69-95.	Yes	Reviews in Fish Biology and Fisheries	Fisheries	USA	For example, Worm et al. (2006) recently made the controversial claim that fisheries are declining fast enough to be exhausted by the year 2048, and that the remediation for this failure of conventional management was MPAs // Furthermore, effects on fishery yield have been reviewed for only small fraction of these MPAs (e.g., nine in Worm et al. 2006).	Intro / Conclusions	No	University of California, Davis	No	0	2.5
63	Biology	0-2	2008	No	4	Male	Other	No	Yes	Yes	No	No	2	No	Yes	Yes	Boulton, A. J., G. D. Fenwick, P. J. Hancock, and M. S. Harvey. 2008. Biodiversity, functional roles and ecosystem services of groundwater invertebrates. Invertebrate Systematics 22:103-116.	Yes	Invertebrate Systematics	Biology	Australia	with numerous examples of precipitous declines in biodiversity across a range of terrestrial, marine, and aquatic ecosystems (Sodhi et al. 2004; Millenium Ecosystem Assessment 2005; Worm et al. 2006). // The natural diversity of all organisms is an essential resource for humans, providing food, clean water, oxygen,medical products, and other fundamental requirements (Grifo and Rosenthal 1997; Wor…	Intro	No	University of New England	No	0	1.351
64	Other	0-2	2009	No	4	Male	Europe	No	No	No	Yes	No	1	No	No	Yes	Bouma, T. J., S. Olenin, K. Reise, and T. Ysebaert. 2009. Ecosystem engineering and biodiversity in coastal sediments: posing hypotheses. Helgoland Marine Research 63:95-106.	Yes	Helgoland Marine Research	Other	The Netherlands	An in-depth understanding of the impacts of biodiversity loss (Worm et al. 2006) and reduction of ecosystem size (Barbier et al. 2008) on ecosystem services is essential to the well being of mankind.	Discussion	No	Netherlands Institute of Ecology	No	0	1.281
65	Ecology	3-5	2009	No	3	Female	USA	No	Yes	Yes	Yes	No	3	No	No	Yes	Boyer, K. E., J. S. Kertesz, and J. F. Bruno. 2009. Biodiversity effects on productivity and stability of marine macroalgal communities: the role of environmental context. Oikos 118:1062-1072.	Yes	Oikos	Ecology	USA	The importance of species richness in driving primary production has been the main focus, and synthesis is now possible across more than one hundred experimental tests of richness effects (Balvanera et al. 2006, Cardinale et al. 2006, Worm et al. 2006). // To date, we know little of the role of environmental context on richness production relationships outside of terrestrial plant and microbial c…	Intro / Discussion	No	San Francisco State University	No	0	3.061
66	Other	None	2007	No	2	Male	USA	No	No	No	Yes	No	1	No	No	No	Bracken, M. and L. Rogers-Bennett. 2007. Ecological interactions useful for marine ecosystem-based management: The role of positive species interactions, ecosystem engineers, and species diversity. California Cooperative Oceanic Fisheries Investigations Reports 48:69-70.	Yes	California Cooperative Oceanic Fisheries Investigations Reports	Oceanography	USA	We encourage readers to examine their related recent papers (e.g., Mumby et al. 2006; Worm et al. 2006).	Discussion	No	Northeastern University	No	0	None
67	Other	None	2007	No	3	Male	USA	No	No	Yes	Yes	Yes	4	No	No	Yes	Bracken, M. E. S., B. E. Bracken, and L. Rogers-Bennett. 2007. Species diversity and foundation species: Potential indicators of fisheries yields and marine ecosystem functioning. California Cooperative Oceanic Fisheries Investigations Reports 48:82-91.	Yes	California Cooperative Oceanic Fisheries Investigations Reports	Oceanography	USA	Whereas most of the research on the relationships between diversity and ecosystem function has been conducted in terrestrial systems (Naeem and Wright 2003; Gessner et al. 2004), recent work indicates that similar relationships can be found in marine systems (Worm et al. 2006). // In fact, a recent synthesis of evidence from marine systems supports an overall positive effect of diversity on a var…	Intro / Discussion	No	Northeastern University	No	0	None
68	Multidisciplinary	>5	2008	No	4	Male	USA	Yes	Yes	Yes	No	No	1	No	No	Yes	Bracken, M. E. S., S. E. Friberg, C. A. Gonzalez-Dorantes, and S. L. Williams. 2008. Functional consequences of realistic biodiversity changes in a marine ecosystem. Proceedings of the National Academy of Sciences of the United States of America 105:924-928.	Yes	Proceedings of the National Academy of Sciences of the United States of America	Multidisciplinary	USA	[Motivated by global declines in biodiversity (1, 2)], many studies have documented important links between the number of species in an ecosystem and the functioning (e.g., productivity, elemental cycling, and trophic transfer of energy) of that system (3, 4).	Intro	No	Northeastern University	No	0	9.681
69	Biology	>5	2008	No	5	Male	Canada	Yes	Yes	Yes	No	No	1	No	Yes	No	Bradbury, I. R., B. Laurel, P. V. R. Snelgrove, P. Bentzen, and S. E. Campana. 2008. Global patterns in marine dispersal estimates: the influence of geography, taxonomic category and life history. Proceedings of the Royal Society B-Biological Sciences 275:1803-1809.	Yes	Proceedings of the Royal Society B-Biological Sciences	Biology	Canada	Worldwide collapse of commercial marine species (e.g. Baum et al. 2003; Worm et al. 2006)	Intro	No	Dalhousie University	No	0	5.415
70	Fisheries	0-2	2008	No	8	Male	Canada	No	Yes	Yes	Yes	No	2	No	No	No	Bradbury, I. R., B. J. Laurel, D. Robichaud, G. A. Rose, P. V. R. Snelgrove, R. S. Gregory, D. Cote, and M. J. S. Windle. 2008. Discrete spatial dynamics in a marine broadcast spawner: Re-evaluating scales of connectivity and habitat associations in Atlantic cod (Gadus morhua L.) in coastal Newfoundland. Fisheries Research 91:299-309.	Yes	Fisheries Research	Fisheries	Canada	However, recent shifts in adult fish distributions (Devine et al., 2006; Worm et al., 2006) // Historical interpretations of the spatial ecology of marine species require re-evaluation given recent wide-scale alteration in spatial dynamics of marine communities (Worm et al., 2006)	Intro / Discussion	No	Dalhousie University	No	0	1.586
71	Other	3-5	2009	No	2	Male	Other	No	No	No	Yes	No	1	No	No	No	Bradbury, R. H. and R. M. Seymour. 2009. Coral reef science and the new commons. Coral Reefs 28:831-837.	Yes	Coral Reefs	Other	Australia	Now consider overfishing. We know that global fishing pressure is accelerating, probably ahead of global GDP (Berkes et al. 2006; Scales et al. 2006; Worm et al. 2006; Halpern et al. 2008; Jackson 2008).	Discussion	No	Australian National University	No	0	3.878
72	Other	0-2	2012	No	3	Male	USA	No	No	No	Yes	No	1	No	Yes	No	Braje, T. J., T. C. Rick, and J. M. Erlandson. 2012. A trans-Holocene historical ecological record of shellfish harvesting on California's Northern Channel Islands. Quaternary International 264:109-120.	Yes	Quaternary International	Other	USA	The current crisis of the oceans, including the accelerating degradation of fisheries and marine ecosystems around the world, has prompted many scientists and resource managers to reconsider management strategies (e.g., Jackson et al., 2001; Lotze et al., 2006; Worm et al., 2006).	Conclusions	No	San Diego State University	No	0	1.874
73	Policy	0-2	2008	No	1	Male	USA	Yes	Yes	Yes	Yes	Yes	4	Yes	Yes	Yes	Branch, T. A. 2008. Not all fisheries will be collapsed in 2048. Marine Policy 32:38-39.	Yes	Marine Policy	Policy	USA	In a recently published paper, Worm et al. [Impacts of biodiversity loss on ocean ecosystem services. Science 2006;314:787–90.] project ‘‘the global collapse of all taxa currently fished’’ by 2048. // In a paper recently published in Science, Worm et al. [1] project ‘‘the global collapse of all taxa currently fished’’ by 2048, and magnify this statement through press releases prominently displaye…	Abstract // Discussion	No	University of Washington	No	0	1.865
74	Conservation	2-3	2012	No	7	Male	USA	No	Yes	No	Yes	No	2	Yes	No	No	Branch, T. A., J. D. Austin, K. Acevedo-Whitehouse, I. J. Gordon, M. E. Gompper, T. E. Katzner, and N. Pettorelli. 2012. Fisheries conservation and management: finding consensus in the midst of competing paradigms. Animal Conservation 15:1-3.	Yes	Animal Conservation	Conservation	USA	Even worse, it has been argued that current trends will lead to the global collapse of all fisheries by 2048 (Worm et al., 2006). // Furthermore, the rather sensational prediction that all fisheries will collapse by 2048 (Worm et al., 2006)	Discussion	No	University of Washington	No	0	2.931
75	Conservation	3-5	2011	No	5	Male	USA	No	No	Yes	Yes	Yes	8	No	Yes	No	Branch, T. A., O. P. Jensen, D. Ricard, Y. M. Ye, and R. Hilborn. 2011. Contrasting Global Trends in Marine Fishery Status Obtained from Catches and from Stock Assessments. Conservation Biology 25:777-786.	Yes	Conservation Biology	Conservation	USA	Fisheries scientists and ecologists have defined stocks as “collapsed” or “overexploited” on the basis of catch and biomass data (e.g., Worm et al. 2006; Pauly 2007, 2008). // It is assumed that a stock in a state of collapse (i.e., collapsed) contributes little to ecosystem processes relative to its unfished state (e.g., Worm et al. 2006; Worm et al. 2009). // We applied these definitions of col…	Intro / Discussion	No	University of Washington	No	0	4.692
76	Multidisciplinary	>5	2007	No	1	Male	Europe	No	No	No	Yes	No	1	No	No	Yes	Brander, K. M. 2007. Global fish production and climate change. Proceedings of the National Academy of Sciences of the United States of America 104:19709-19714.	Yes	Proceedings of the National Academy of Sciences of the United States of America	Multidisciplinary	Denmark	A recent metaanalysis concluded that the oceans’ capacity to provide food, maintain water quality, and recover from perturbation has been impaired through loss of biodiversity (16)	Discussion	No	International Council for the Exploration of the Sea	No	0	9.681
77	Biology	>5	2008	No	1	Female	Europe	No	No	No	Yes	No	1	No	No	Yes	Brandt, A. 2008. Deep-Sea Ecology: Infectious Impact on Ecosystem Function. Current Biology 18:R1104-R1106.	Yes	Current Biology	Biology	Germany	showing that species diversity generally has a positive but saturating effect on ecosystem processes [7–10]	Discussion	No	Zoological Institute and Zoological Museum	No	0	9.647
78	Other	2-3	2007	No	6	Female	Europe	No	No	No	Yes	No	1	No	No	Yes	Brandt, A., S. Brix, W. Brokeland, M. Choudhury, S. Kaiser, and M. Malyutina. 2007. Deep-sea isopod biodiversity, abundance, and endemism in the Atlantic sector of the Southern Ocean-Results from the ANDEEP I-III expeditions. Deep-Sea Research Part II-Topical Studies in Oceanography 54:1760-1775.	Yes	Deep-Sea Research Part II-Topical Studies in Oceanography	Oceanography	Germany	Worm et al. (2006) discussed the buffering impact of high species diversity on the resistance and recovery of ecosystems.	Discussion	No	Zoological Institute and Zoological Museum	No	0	2.277
79	Fisheries	2-3	2008	No	1	Male	USA	Yes	Yes	Yes	Yes	No	3	Yes	Yes	Yes	Briggs, J. C. 2008. The North Atlantic Ocean: Need for proactive management. Fisheries 33:180-185.	Yes	Fisheries	Fisheries	USA	Recently, it has been observed that the ongoing erosion of marine biodiversity reveals a trend that predicts the global collapse of all currently fished taxa by the year 2048 (Worm et al. 2006). // A recent review devoted to ocean ecosystem services (Worm et al. 2006) found that experimental data, when combined, revealed a striking general picture indicating that increased diversity of both prima…	Intro / Discussion	No	Oregon State University	No	0	2.367
80	Biology	2-3	2009	No	1	Male	USA	No	No	No	Yes	No	1	No	Yes	Yes	Briggs, J. C. 2009. Atlantic coral reefs: the transplantation alternative. Biological Invasions 11:1845-1854.	Yes	Biological Invasions	Biology	USA	Comparison of records from coastal ecosystems has shown that those with higher species richness demonstrated lower rates of collapse of commercially important fish and invertebrate taxa over time (Worm et al. 2006).	Discussion	No	Oregon State University	No	0	2.896
81	Biology	2-3	2010	No	1	Male	USA	No	No	No	Yes	No	1	No	Yes	Yes	Briggs, J. C. 2010. Marine biology: the role of accommodation in shaping marine biodiversity. Marine Biology 157:2117-2126.	Yes	Marine Biology	Biology	USA	Comparison of records from coastal ecosystems has shown that those with higher species richness demonstrated lower rates of collapse of commercially important fish and invertebrate taxa over time (Worm et al. 2006). Further, collapses in large marine ecosystems occurred at a higher rate in species-poor ecosystems, when compared to species-rich ones.	Discussion	No	Oregon State University	No	0	2.276
82	Fisheries	2-3	2010	No	1	Male	USA	No	No	No	Yes	No	2	No	Yes	Yes	Briggs, J. C. 2010. North Atlantic Fisheries: A Response to Criticism of the Proactive Proposal. Fisheries 35:296-298.	Yes	Fisheries	Fisheries	USA	Furthermore, the comprehensive review by Worm et al. (2006) provided solid evidence that greater biodiversity provides tangible benefits. In that review, a comparison of records from coastal ecosystems showed that those with higher species richness demonstrated lower rates of collapse of commercially important fish and invertebrate taxa over time. And it was found that collapses in large marine e…	Discussion	No	Oregon State University	No	0	2.367
83	Ecology	2-3	2012	No	1	Male	USA	No	No	No	Yes	No	1	No	Yes	Yes	Briggs, J. C. 2012. Marine species invasions in estuaries and harbors. Marine Ecology-Progress Series 449:297-302.	Yes	Marine Ecology-Progress Series	Ecology	USA	Comparison of records from coastal ecosystems has shown that those with higher species richness demonstrated lower rates of collapse of commercially important fish and invertebrate taxa over time (Worm et al. 2006).	Discussion	No	Oregon State University	No	0	2.711
84	Fisheries	0-2	2009	No	7	Male	USA	No	Yes	Yes	No	No	1	No	No	No	Brill, R., P. Bushnell, L. Smith, C. Speaks, R. Sundaram, E. Stroud, and J. Wang. 2009. The repulsive and feeding-deterrent effects of electropositive metals on juvenile sandbar sharks (Carcharhinus plumbeus). Fishery Bulletin 107:298-307.	Yes	Fishery Bulletin	Fisheries	USA	Such severe reductions in elasmobranch populations have the potential to detrimentally restructure marine ecosystems (Jackson et al., 2001; Myers and Worm, 2003; Worm et al., 2006; Myers et al., 2007)	Intro	No	Northeast Fisheries Science Center	No	0	1.098
85	Other	0-2	2010	No	3	Male	USA	No	Yes	Yes	No	No	1	No	Yes	No	Brock, W., A. Kinzig, and C. Perrings. 2010. Modeling the Economics of Biodiversity and Environmental Heterogeneity. Environmental & Resource Economics 46:43-58.	Yes	Environmental & Resource Economics	Economics	USA	Direct depletion through ‘harvesting’ is currently the primary cause of biodiversity change in most marine systems (e.g. Worm et al. 2006).	Intro	No	University of Wisconsin-Madison	No	0	1.523
86	Biology	None	2010	No	3	Female	USA	No	Yes	Yes	No	No	1	No	No	Yes	Brown, B. K., E. Soule, and L. Kaufman. 2010. Effects of excluding bottom-disturbing mobile fishing gear on abundance and biomass of groundfishes in the Stellwagen Bank National Marine Sanctuary, USA. Current Zoology 56:134-143.	Yes	Current Zoology	Biology	USA	Losses of localized populations and biodiversity negatively impact the stability of marine systems and decrease their abilities to recover from stochastic events or human activities such as overfishing and pollution (Worm et al., 2006).	Intro	No	Boston University	No	0	None
87	Other	2-3	2011	No	4	Male	Canada	No	Yes	Yes	No	No	1	Yes	Yes	No	Brown, C. J., S. J. Smith, P. Lawton, and J. T. Anderson. 2011. Benthic habitat mapping: A review of progress towards improved understanding of the spatial ecology of the seafloor using acoustic techniques. Estuarine Coastal and Shelf Science 92:502-520.	Yes	Estuarine Coastal and Shelf Science	Other	Canada	Without immediate action to mitigate these impacts, it is predicted that by the middle of the 21st century commercial fish and seafood stocks will collapse beyond the point of recovery (Worm et al., 2006).	Intro	No	Bedford Institute of Oceanography	No	0	2.247
88	Fisheries	0-2	2011	No	2	Male	USA	No	No	Yes	No	No	1	No	No	No	Brown, R. A. and E. V. Thuesen. 2011. BIODIVERSITY OF MOBILE BENTHIC FAUNA IN GEODUCK (PANOPEA GENEROSA) AQUACULTURE BEDS IN SOUTHERN PUGET SOUND, WASHINGTON. Journal of Shellfish Research 30:771-776.	Yes	Journal of Shellfish Research	Fisheries	USA	Biodiversity is often used in ecological studies as an indicator of ecosystem health (Hooper et al. 2005, Worm et al. 2006).	Intro	No	Evergreen State College	No	0	0.793
89	Other	>5	2009	No	4	Male	Europe	No	No	No	Yes	No	7	Yes	Yes	Yes	Brunner, E. J., P. J. S. Jones, S. Friel, and M. Bartley. 2009. Fish, human health and marine ecosystem health: policies in collision. International Journal of Epidemiology 38:93-100.	Yes	International Journal of Epidemiology	Other	United Kingdom	There is increasing evidence that large-scale fishing can have ruinous effects on marine ecosystems and their fish populations. [27,28] // Unless the current trajectory is altered decisively, human predation is predicted to lead to complete collapse of all economically important species by the mid 21st century, potentially causing irreversible damage to marine ecosystems. [28] // A pivotal study …	Discussion	No	University College London	No	0	6.414
90	Ecology	>5	2008	No	2	Male	USA	No	No	No	Yes	No	2	No	No	Yes	Bruno, J. F. and B. J. Cardinale. 2008. Cascading effects of predator richness. Frontiers in Ecology and the Environment 6:539-546.	Yes	Frontiers in Ecology and the Environment	Ecology	USA	More recently, ecologists have begun to argue that the conservation of predator richness would broadly enhance ecological functioning and services (Worm et al. 2006). // However, there is currently little scientific evidence to support the idea that the conservation of predator biodiversity will broadly enhance ecosystem functioning. Management recommendations based on this premise (eg Worm et al…	Discussion	No	The University of North Carolina at Chapel Hill	No	0	9.113
91	Ecology	2-3	2010	No	4	Female	Canada	No	Yes	Yes	No	No	2	No	No	Yes	Bui, A. O. V., P. Ouellet, M. Castonguay, and J. C. Brethes. 2010. Ichthyoplankton community structure in the northwest Gulf of St. Lawrence (Canada): past and present. Marine Ecology-Progress Series 412:189-205.	Yes	Marine Ecology-Progress Series	Ecology	Canada	It is widely accepted that species diversity, which is defined as richness, abundance, and composition of species as well as interactions between species, promotes production and ecosystem stability (Chapin et al. 2000, Hooper et al. 2005, Duffy & Stachowicz 2006, Tilman et al. 2006, Worm et al. 2006). // However, anthropogenic activities can affect community biodiversity directly by exploitation…	Intro	No	Institut Maurice Lamontagne	No	0	2.711
92	Multidisciplinary	>5	2008	No	2	Male	USA	No	Yes	Yes	Yes	No	3	No	Yes	Yes	Burkepile, D. E. and M. E. Hay. 2008. Herbivore species richness and feeding complementarity affect community structure and function on a coral reef. Proceedings of the National Academy of Sciences of the United States of America 105:16201-16206.	Yes	Proceedings of the National Academy of Sciences of the United States of America	Multidisciplinary	USA	Marine ecosystems appear at special risk of degradation after loss of consumers (10, 11), // Further, complementary resource use [, a mechanism often cited as driving the positive effect of plant species diversity on ecosystem function (32) but that ] is less commonly addressed in studies of consumer diversity (10) // Harvesting of marine consumers has impacted the function of many marine ecosyst…	Intro / Discussion	No	Georgia Institute of Technology	No	0	9.681
93	Multidisciplinary	3-5	2010	No	2	Male	USA	No	No	No	Yes	No	1	No	No	Yes	Burkepile, D. E. and M. E. Hay. 2010. Impact of Herbivore Identity on Algal Succession and Coral Growth on a Caribbean Reef. Plos One 5.	Yes	PLoS One	Multidisciplinary	USA	Coastal marine systems often suffer losses of ecosystem function following reductions in biodiversity [51]	Discussion	No	Georgia Institute of Technology	No	0	4.092
94	Other	3-5	2011	No	2	Male	USA	No	No	No	Yes	Yes	1	No	No	Yes	Burkepile, D. E. and M. E. Hay. 2011. Feeding complementarity versus redundancy among herbivorous fishes on a Caribbean reef. Coral Reefs 30:351-362.	Yes	Coral Reefs	Other	USA	Marine ecosystems suffer negative effects of biodiversity loss (Worm et al. 2006; Stachowicz et al. 2007), underscoring the need for a better understanding of the functional role of biodiversity.	Discussion	No	Florida International University	No	0	3.878
95	Ecology	>5	2009	Yes	2	Male	USA	Yes	Yes	Yes	No	No	1	No	No	Yes	Byrnes, J. and J. J. Stachowicz. 2009. Short and long term consequences of increases in exotic species richness on water filtration by marine invertebrates. Ecology Letters 12:830-841.	Yes	Ecology Letters	Ecology	USA	The past decade has witnessed an explosion of research addressing the consequences of global declines in biodiversity for ecosystem function (Hooper et al. 2005; Spehn et al. 2005; Cardinale et al. 2006; Worm et al. 2006; Stachowicz et al. 2007).	Intro	No	University of California, Davis	No	1	17.557
96	Multidisciplinary	3-5	2007	Yes	3	Male	USA	No	Yes	Yes	Yes	No	2	No	No	Yes	Byrnes, J. E., P. L. Reynolds, and J. J. Stachowicz. 2007. Invasions and Extinctions Reshape Coastal Marine Food Webs. Plos One 2.	Yes	PLoS One	Multidisciplinary	USA	Although a number of studies have recently considered the consequences of diversity loss for ecosystem functioning [see reviews by 3, 4] // While these results are largely from controlled experiments that may only include relatively strongly interacting species, they appear to be robust and match patterns observed from field surveys [22] and fisheries data [4] that incorporate total community ric…	Intro / Discussion	No	University of California, Davis	No	1	4.092
97	Ecology	3-5	2009	Yes	2	Male	USA	No	Yes	No	Yes	No	1	No	No	Yes	Byrnes, J. E. and J. J. Stachowicz. 2009. The consequences of consumer diversity loss: different answers from different experimental designs. Ecology 90:2879-2888.	Yes	Ecology	Ecology	USA	Experimentally changing species number alters ecosystem structure and function under a wide variety of scenarios (for review, see Hooper et al. 2005, Balvanera et al. 2006, Cardinale et al. 2006, Worm et al. 2006, Stachowicz et al. 2007)	Conclusions	No	University of California, Davis	No	1	4.849
98	Policy	0-2	2011	No	2	Male	Other	Yes	Yes	Yes	No	No	1	No	Yes	No	Cabral, R. B. and P. M. Alino. 2011. Transition from common to private coasts: Consequences of privatization of the coastal commons. Ocean & Coastal Management 54:66-74.	Yes	Ocean & Coastal Management	Policy	Philippines	Fish stocks and catches worldwide are continually declining (Pauly et al., 2002; Worm et al., 2006)	Intro	No	University of the Philippines	No	0	1.333
99	Other	0-2	2011	No	8	Female	Europe	No	No	No	Yes	No	1	No	No	No	Calvo, E., R. Simo, R. Coma, M. Ribes, J. Pascual, A. Sabates, J. M. Gili, and C. Pelejero. 2011. Effects of climate change on Mediterranean marine ecosystems: the case of the Catalan Sea. Climate Research 50:1-29.	Yes	Climate Research	Other	Spain	The ichthyofauna channels a significant part of the energy fixed by primary production, structures the biological community (playing a role at several trophic levels) and contributes to biodiversity (Worm et al. 2006).	Discussion	No	Institut de Ciències del Mar	No	0	1.994
100	Ecology	2-3	2009	No	4	Female	USA	No	Yes	Yes	No	No	1	No	Yes	No	Campbell, L. M., N. J. Gray, E. L. Hazen, and J. M. Shackeroff. 2009. Beyond Baselines: Rethinking Priorities for Ocean Conservation. Ecology and Society 14.	Yes	Ecology and Society	Ecology	USA	These features, combined with general concerns about widespread overfishing (Worm et al. 2006, Food and Agriculture Organization (FAO) 2007), help explain SBS’s [shifting baselines] popularity.	Intro	No	Duke University	No	0	2.516
101	Other	0-2	2012	No	3	Male	Europe	No	No	Yes	No	No	1	No	Yes	No	Campling, L., E. Havice, and P. M. Howard. 2012. The Political Economy and Ecology of Capture Fisheries: Market Dynamics, Resource Access and Relations of Exploitation and Resistance. Journal of Agrarian Change 12:177-203.	Yes	Journal of Agrarian Change	Other	United Kingdom	Scientific studies detail fish and ecosystem decline, predict collapse and debate current fish population status and management efficacy (Jackson et al. 2001; Myers and Worm 2003;Worm et al. 2006; Mora et al. 2009;Worm et al. 2009).	Intro	No	University of London	No	0	1.348
102	Other	0-2	2009	No	1	Male	USA	No	No	No	Yes	No	2	No	Yes	No	Cannon, D. 2009. FROM FISH OIL TO MICROALGAE OIL ... A WIN-WIN SHIFT FOR HUMANS AND OUR HABITAT. Explore-the Journal of Science and Healing 5:299-303.	Yes	Explore-the Journal of Science and Healing	Other	USA	A seminal article written by several of the world’s leading marine scientists, published in Science in November 2006, has ominous implications for not only fish but for our oceans and planetary balance.[21] Worm et al [21] are examining the impact of biodiversity loss on ocean ecosystems and coastal communities. By using sophisticated research methods that pool large numbers of regional research …	Discussion	No	Medical Associates of Central Virginia	No	0	1.027
103	Multidisciplinary	>5	2012	Yes	17	Male	USA	No	No	No	Yes	No	4	No	No	Yes	Cardinale, B. J., J. E. Duffy, A. Gonzalez, D. U. Hooper, C. Perrings, P. Venail, A. Narwani, G. M. Mace, D. Tilman, D. A. Wardle, A. P. Kinzig, G. C. Daily, M. Loreau, J. B. Grace, A. Larigauderie, D. S. Srivastava, and S. Naeem. 2012. Biodiversity loss and its impact on humanity. Nature 486:59-67.	Yes	Nature	Multidisciplinary	USA	Meta-analyses published since 2005 have shown that, as a general rule, reductions in the number of genes, species and functional groups of organisms reduce the efficiency by which whole communities capture biologically essential resources (nutrients, water, light, prey), and convert those resources into biomass [12,24–28,30–35] // the field has coalesced around a series of key findings and themes…	Discussion	No	University of Michigan	No	1	36.28
104	Ecology	>5	2009	No	5	Male	USA	No	No	No	Yes	No	1	No	No	Yes	Cardinale, B. J., H. Hillebrand, W. S. Harpole, K. Gross, and R. Ptacnik. 2009. Separating the influence of resource 'availability' from resource 'imbalance' on productivity-diversity relationships. Ecology Letters 12:475-487.	Yes	Ecology Letters	Ecology	USA	At least five recently published meta-analyses have summarized the findings of experiments performed to date (Balvanera et al. 2006; Cardinale et al. 2006, 2007; Worm et al. 2006; Stachowicz et al. 2007). These analyses have shown that experimental reductions in species richness can reduce the efficiency by which communities capture resources and convert those into new biomass by as much as 50%.	Discussion	No	University of California, Santa Barbara	No	0	17.557
105	Other	2-3	2011	Yes	9	Male	USA	No	No	Yes	No	No	2	No	No	Yes	Cardinale, B. J., K. L. Matulich, D. U. Hooper, J. E. Byrnes, E. Duffy, L. Gamfeldt, P. Balvanera, M. I. O'Connor, and A. Gonzalez. 2011. THE FUNCTIONAL ROLE OF PRODUCER DIVERSITY IN ECOSYSTEMS. American Journal of Botany 98:572-592.	Yes	American Journal of Botany	Other	USA	Between 2006 and 2008, six formal metaanalyses of the BEF [biodiversity and ecosystem functioning] literature were independently published (Balvanera et al., 2006 ; Cardinale et al., 2006 , 2007 ; Worm et al., 2006 ; Stachowicz et al., 2007 ; Cadotte et al., 2008 ) // To identify new studies for inclusion, we (1) repeated the ISI Web of Science keyword search described and augmented this search b…	Intro / Methods	Yes	University of Michigan	No	1	2.664
106	Ecology	3-5	2011	No	2	Male	USA	No	No	Yes	No	No	1	No	No	No	Carey, M. P. and D. H. Wahl. 2011. Determining the mechanism by which fish diversity influences production. Oecologia 167:189-198.	Yes	Oecologia	Ecology	USA	Species-specific influences of fish on ecosystem processes have been found (Worm et al. 2006; Burkepile and Hay 2008)	Intro	No	University of Illinois	No	0	3.412
107	Ecology	2-3	2009	No	2	Male	USA	No	No	No	Yes	No	1	No	Yes	No	Caron, D. A. and P. D. Countway. 2009. Hypotheses on the role of the protistan rare biosphere in a changing world. Aquatic Microbial Ecology 57:227-238.	Yes	Aquatic Microbial Ecology	Ecology	USA	In a similar fashion, overfishing of several commercially valued macroscopic species has resulted in ecological extinction of these species (although not necessarily biological extinction), significantly altering food web structure and pathways of energy flow in many marine coastal ecosystems (Pandolfi et al. 2005, Worm et al. 2006).	Discussion	No	University of Southern California	No	0	2.393
108	Biology	None	2012	No	1	Female	Canada	Yes	Yes	Yes	No	No	1	No	No	No	Carr, C. 2012. Polychaete diversity and distribution patterns in Canadian marine waters. Marine Biodiversity 42:93-107.	Yes	Marine Biodiversity	Biology	Canada	Recent efforts to monitor the effects of human activity and climate change have fostered major advances in the field of marine biodiversity (Worm et al. 2006; Radulovici et al. 2010; Bucklin et al. 2011).	Intro	No	University of Guelph	No	0	None
109	Fisheries	0-2	2012	No	3	Male	Canada	Yes	Yes	Yes	No	No	2	Yes	Yes	No	Carruthers, T. R., C. J. Walters, and M. K. McAllister. 2012. Evaluating methods that classify fisheries stock status using only fisheries catch data. Fisheries Research 119:66-79.	Yes	Fisheries Research	Fisheries	Canada	Recent papers have sought to determine fisheries stock status (e.g. ‘fully exploited’, ‘overexploited’ and ‘crashed’) using only records of fisheries catches or landings (‘catch-based methods’, e.g. Froese and Kesner-Reyes, 2002; Worm et al., 2006; Pauly, 2007, 2008; Zeller et al., 2008; Kleisner and Pauly, 2011). // However perhaps the most high-profile application of catch-based methods is that…	Intro	No	University of British Columbia	No	0	1.586
110	Other	2-3	2011	No	3	Female	Other	No	No	Yes	No	No	1	No	Yes	No	Cawthorn, D. M., H. A. Steinman, and R. C. Witthuhn. 2011. Evaluating the availability of fish species on the South African market and the factors undermining sustainability and consumer choice. Food Control 22:1748-1759.	Yes	Food Control	Other	South Africa	Widespread overfishing has led to the collapse of numerous fish populations worldwide (Hutchings & Reynolds, 2004; Myers & Worm, 2003; Worm, Barbier, & Beaumont, 2006).	Intro	No	University of Stellenbosch	No	0	2.656
111	Other	3-5	2008	No	21	Female	Europe	No	No	Yes	No	No	1	No	Yes	No	Cerda, J., J. Mercade, J. J. Lozano, M. Manchado, A. Tingaud-Sequeira, A. Astola, C. Infante, S. Halm, J. Vinas, B. Castellana, E. Asensio, P. Canavate, G. Martinez-Rodriguez, F. Piferrer, J. V. Planas, F. Prat, M. Yufera, O. Durany, F. Subirada, E. Rosell, and T. Maes. 2008. Genomic resources for a commercial flatfish, the Senegalese sole (Solea senegalensis): EST sequencing, oligo microarray de…	Yes	BMC Genomics	Other	Spain	With the general worldwide decline in wild fishery [20]	Intro	No	Consejo Superior de Investigaciones Científicas (CSIC)	No	0	4.073
112	Biology	2-3	2009	No	10	Male	USA	Yes	Yes	Yes	No	No	1	No	No	No	Chang, A. L., J. D. Grossman, T. S. Spezio, H. W. Weiskel, J. C. Blum, J. W. Burt, A. A. Muir, J. Piovia-Scott, K. E. Veblen, and E. D. Grosholz. 2009. Tackling aquatic invasions: risks and opportunities for the aquarium fish industry. Biological Invasions 11:773-785.	Yes	Biological Invasions	Biology	USA	Invasive species are a growing source of ecological and economic harm worldwide (Chapin et al. 2000; Sala et al. 2000; Worm et al. 2006; Lotze et al. 2006).	Intro	No	University of California, Davis	No	0	2.896
113	Ecology	2-3	2008	No	5	Male	Other	No	No	Yes	Yes	No	2	No	No	Yes	Cheal, A. J., S. K. Wilson, M. J. Emslie, A. M. Dolman, and H. Sweatman. 2008. Responses of reef fish communities to coral declines on the Great Barrier Reef. Marine Ecology-Progress Series 372:211-223.	Yes	Marine Ecology-Progress Series	Ecology	Australia	Maintenance of biodiversity may provide an ‘ecological insurance’ against general ecosystem degradation by enhancing stability and recovery potential (Hooper et al. 2005, Worm et al. 2006) // Maintenance of high ecosystem diversity is a key conservation goal because of the apparent positive relationship between diversity and ecosystem properties (Hooper et al. 2005, Worm et al. 2006).	Intro / Discussion	No	Australian Institute of Marine Science	No	0	2.711
114	Fisheries	>5	2009	Yes	6	Male	Canada	No	Yes	Yes	Yes	No	2	No	No	Yes	Cheung, W. W. L., V. W. Y. Lam, J. L. Sarmiento, K. Kearney, R. Watson, and D. Pauly. 2009. Projecting global marine biodiversity impacts under climate change scenarios. Fish and Fisheries 10:235-251.	Yes	Fish and Fisheries	Fisheries	Canada	Overall, changes in pattern of species richness may disrupt marine biodiversity and ecosystems, and impact commercial fisheries (Roessig et al. 2004; Worm et al. 2006; Cheung et al. 2008b) // marine biodiversity is simultaneously impacted by a range of human activities such as over-fishing, habitat destruction and pollution (Pauly et al. 2002; Dulvy et al. 2003; Lotze et al. 2006; Worm et al. 200…	Intro / Discussion	No	University of British Columbia	No	1	5.8
115	Other	2-3	2008	No	2	Male	Canada	No	No	No	Yes	No	1	No	No	No	Cheung, W. W. L. and U. R. Sumaila. 2008. Trade-offs between conservation and socio-economic objectives in managing a tropical marine ecosystem. Ecological Economics 66:193-210.	Yes	Ecological Economics	Economics	Canada	Besides commercial fishers, the society in general could also obtain benefits from a restored ecosystem, directly (e.g., through ecotourism, recreational fishing, etc) and indirectly (e.g., through increased non-market value, restored ecosystem function, etc.) (Costanza et al., 1998; Balmford et al., 2002; Berman and Sumaila, 2006; Worm et al., 2006).	Discussion	No	University of British Columbia	No	0	2.713
116	Other	0-2	2009	No	2	Female	Other	No	No	No	Yes	No	2	Yes	Yes	No	Chiu, T. H. T. and C. L. Lin. 2009. Ethical management of food systems: plant based diet as a holistic approach. Asia Pacific Journal of Clinical Nutrition 18:647-653.	Yes	Asia Pacific Journal of Clinical Nutrition	Other	Taiwan	Ignorance of the real costs of consuming fish for food has led to the continuous exploitation of the ocean, so that 91% of marine species have reached the state of depletion (>50% decline), 38% collapse (>90% decline), and 7% extinction (100% decline). [40] // With the current trend, a global collapse of all taxonomical groups currently fished is estimated to occur by the mid-21st century. [40]	Discussion	No	The Buddhist Dalin Tzu-Chi General Hospital	No	0	1.133
117	Fisheries	0-2	2010	No	3	Male	Other	No	Yes	Yes	Yes	No	3	No	Yes	Yes	Chong, V. C., P. K. Y. Lee, and C. M. Lau. 2010. Diversity, extinction risk and conservation of Malaysian fishes. Journal of Fish Biology 76:2009-2066.	Yes	Journal of Fish Biology	Fisheries	Malaysia	Large global data sets across spatial and temporal scales indicate that as marine biodiversity declines, the ocean’s capacity to provide food, maintain water quality and recover from perturbations becomes severely impaired (Worm et al., 2006). Biodiversity loss in coastal ecosystems impaired at least three ecosystem services, namely provision of fisheries, nursery habitats and filtering and detox…	Intro / Discussion	No	University of Malaya	No	0	1.685
118	Multidisciplinary	0-2	2010	No	6	Male	Other	No	Yes	Yes	No	No	1	No	Yes	No	Chou, L. M., D. W. Huang, K. P. P. Tun, J. T. B. Kwik, Y. C. Tay, and A. L. Seow. 2010. Temporal Changes in Reef Community Structure at Bintan Island (Indonesia) Suggest Need for Integrated Management. Pacific Science 64:99-111.	Yes	Pacific Science	Multidisciplinary	Singapore	Unfortunately, habitats in and around that region have been threatened by a plethora of human activities, leading to biodiversity loss and ecosystem collapse (Morton and Blackmore 2001, Bruno and Selig 2007; see also Hughes et al. 2003, Bellwood et al. 2004, Worm et al. 2006, Hoegh-Guldberg et al. 2007).	Intro	No	National University of Singapore	No	0	0.862
119	Conservation	0-2	2011	No	1	Male	USA	No	No	Yes	Yes	No	4	No	Yes	No	Christie, P. 2011. Creating space for interdisciplinary marine and coastal research: five dilemmas and suggested resolutions. Environmental Conservation 38:172-186.	Yes	Environmental Conservation	Conservation	USA	The decline of ocean resources and ecosystems has received considerable attention within the marine scientific community and popular media (Pauly et al. 1998; New York Times 2006; Worm et al. 2006, 2009; Halpern et al. 2008; Rosenthal 2008). // Ecological analyses of large-scale global change processes promote such scaling (Pauly et al. 1998; Pandolfi et al. 2003; Mora et al. 2006; Worm et al. 20…	Intro / Discussion	No	University of Washington	No	0	1.927
120	Fisheries	>5	2009	No	1	Female	Canada	No	Yes	Yes	No	No	1	No	Yes	No	Chu, C. 2009. Thirty years later: the global growth of ITQs and their influence on stock status in marine fisheries. Fish and Fisheries 10:217-230.	Yes	Fish and Fisheries	Fisheries	Canada	Many marine fish stocks are in decline worldwide. The collapses of what were once thought to be inexhaustible resources such as Atlantic cod (Gadus morhua, Gadidae), and high-profile species such as northern bluefin tuna (Thunnus thynnus, Scombridae) are well publicized because their declines have far reaching ecological and socioeconomic consequences (Hutchings 2000; Schindler et al. 2002; Worm …	Intro	No	Trent University	No	0	5.8
121	Other	0-2	2008	No	2	Male	USA	No	No	No	Yes	Yes	1	Yes	Yes	No	Clark, B. and R. Clausen. 2008. The oceanic crisis - Capitalism and the degradation of marine ecosystems. Monthly Review-an Independent Socialist Magazine 60:91-111.	Yes	Monthly Review-an Independent Socialist Magazine	Other	USA	The severity of the situation is that if current practices and rates of fish capture continue marine ecosystems and fisheries around the world could collapse by the year 2050.[47]	Discussion	No	North Carolina State University	No	0	0.458
122	Conservation	3-5	2010	No	2	Male	Europe	No	Yes	Yes	Yes	No	2	No	Yes	No	Claudet, J. and S. Fraschetti. 2010. Human-driven impacts on marine habitats: A regional meta-analysis in the Mediterranean Sea. Biological Conservation 143:2195-2206.	Yes	Biological Conservation	Conservation	Italy	potentially leading to a complete loss of the goods and services derived from those ecosystems by humans (Naeem et al., 1994; Costanza and Mageau, 1999; Chapin et al., 2000; Loreau et al., 2001; Worm et al., 2006). // although low sample sizes can be common in meta-analyses based on experiments taken from the literature (Worm et al., 2006).	Intro / Discussion	No	University of Salento	No	0	4.115
123	Conservation	2-3	2010	No	3	Male	Europe	Yes	Yes	Yes	No	No	1	No	No	Yes	Claudet, J., P. Lenfant, and M. Schrimm. 2010. Snorkelers impact on fish communities and algae in a temperate marine protected area. Biodiversity and Conservation 19:1649-1658.	Yes	Biodiversity and Conservation	Conservation	Italy	but over the past 30 years, increased flows of population worldwide on coastal areas led to high anthropogenic pressure, affecting the sustainability of these areas and their ability to provide goods and services (Worm et al. 2006; Mora 2008)	Intro	No	University of Salento	No	0	2.238
124	Fisheries	2-3	2009	No	3	Female	Other	No	No	No	Yes	No	1	No	Yes	No	Clemente, S., J. C. Hernandez, and A. Brito. 2009. Evidence of the top - down role of predators in structuring sublittoral rocky-reef communities in a Marine Protected Area and nearby areas of the Canary Islands. Ices Journal of Marine Science 66:64-71.	Yes	ICES Journal of Marine Science	Fisheries	Canary Islands	in agreement with the worldwide trend in declining fishery resources in the past few decades (Pauly et al., 1998; Worm et al., 2006).	Discussion	No	Universidad de La Laguna	No	0	2.007
125	Ecology	2-3	2011	No	3	Female	Other	Yes	Yes	Yes	No	No	1	No	Yes	No	Clemente, S., J. C. Hernandez, and A. Brito. 2011. Context-dependent effects of marine protected areas on predatory interactions. Marine Ecology-Progress Series 437:119-133.	Yes	Marine Ecology-Progress Series	Ecology	Canary Islands	In marine environments, fishing activities have historically targeted large-bodied predators, in many cases leading to severe population declines or even extinctions (Jackson et al. 2001, Worm et al. 2006)	Intro	No	Universidad de La Laguna	No	0	2.711
126	Ecology	2-3	2010	No	4	Female	Other	No	No	Yes	Yes	No	3	No	Yes	Yes	Clemente, S., J. C. Hernandez, A. Rodriguez, and A. Brito. 2010. Identifying keystone predators and the importance of preserving functional diversity in sublittoral rocky-bottom areas. Marine Ecology-Progress Series 413:55-67.	Yes	Marine Ecology-Progress Series	Ecology	Canary Islands	Protecting ecosystem processes is imperative not only to conserve the system, but also to maintain the subset of ecological functions that are directly relevant to humans and provide valuable services (De Groot et al. 2002, Worm et al. 2006). // including depletion in the fish communities in line with the global trend (Worm et al. 2006) // However, our results, as well as other studies (Bellwood …	Intro / Discussion	No	Universidad de La Laguna	No	0	2.711
127	Other	2-3	2009	No	2	Male	USA	No	No	Yes	No	No	1	No	No	No	Clements, W. H. and J. R. Rohr. 2009. COMMUNITY RESPONSES TO CONTAMINANTS: USING BASIC ECOLOGICAL PRINCIPLES TO PREDICT ECOTOXICOLOGICAL EFFECTS. Environmental Toxicology and Chemistry 28:1789-1800.	Yes	Environmental Toxicology and Chemistry	Other	USA	Ecotoxicological applications: Measurement and assessment endpoints in ecological risk assessment [125,133–136]	Intro	No	Colorado State University	No	0	2.809
128	Ecology	>5	2008	No	2	Male	USA	No	No	No	Yes	Yes	2	No	No	No	Cloern, J. E. and A. D. Jassby. 2008. Complex seasonal patterns of primary producers at the land-sea interface. Ecology Letters 11:1294-1303.	Yes	Ecology Letters	Ecology	USA	Connectivity to land further implies time-varying inputs of fresh water and sediments and strong influence from the myriad human disturbances that are focused in the coastal zone (Harley et al. 2006; Worm et al. 2006). // Coastal marine ecosystems, and the vital ecological and socio-economic services they provide, are at risk from anthropogenic climate change (Harley et al. 2006; Worm et al. 2006)	Discussion	No	US Geological Survey	No	0	17.557
129	Multidisciplinary	>5	2007	No	4	Male	USA	No	No	No	Yes	Yes	1	No	No	No	Cloern, J. E., A. D. Jassby, J. K. Thompson, and K. A. Hieb. 2007. A cold phase of the East Pacific triggers new phytoplankton blooms in San Francisco Bay. Proceedings of the National Academy of Sciences of the United States of America 104:18561-18565.	Yes	Proceedings of the National Academy of Sciences of the United States of America	Multidisciplinary	USA	Estuaries are the most degraded marine ecosystems (12), and recent assessments highlight the growing environmental and societal costs of this degradation (27)	Discussion	No	US Geological Survey	No	0	9.681
130	Other	2-3	2012	No	5	Female	Europe	No	No	No	Yes	No	1	Yes	Yes	No	Clonan, A., M. Holdsworth, J. A. Swift, D. Leibovici, and P. Wilson. 2012. The dilemma of healthy eating and environmental sustainability: the case of fish. Public Health Nutrition 15:277-284.	Yes	Public Health Nutrition	Other	United Kingdom	Increasing supply is, however, problematic as the marine ecosystem is already being exploited to such an extent that it is projected that worldwide fish stocks will be depleted by 2050 (36).	Discussion	No	University of Nottingham	No	0	2.169
131	Other	2-3	2010	No	2	Male	Europe	No	No	No	Yes	No	2	No	No	Yes	Cognetti, G. and F. Maltagliati. 2010. Ecosystem service provision: An operational way for marine biodiversity conservation and management. Marine Pollution Bulletin 60:1916-1923.	Yes	Marine Pollution Bulletin	Other	Italy	From a global perspective, biodiversity conservation may have a parallel path with long-term economic development, as both must be viewed as interdependent societal goals (Worm et al., 2006; Palumbi et al., 2009). // Management plans dealing with fisheries, pollution control, and marine protected areas should therefore take into account the fact that high diversity of ecosystems, species and popu…	Conclusions	No	Unità di Biologia Marina e Ecologia	No	0	2.503
132	Other	0-2	2009	No	1	Male	USA	No	No	Yes	No	No	1	No	No	Yes	Coker, J. S. 2009. Reinventing Life: Introductory Biology for a Rapidly Evolving World. American Biology Teacher 71:281-284.	Yes	American Biology Teacher	Other	USA	Human impacts on the environment are also driving declines in ecosystem services (Worm et al. 2006; Schroter et al., 2005), as well as political, economic, and social shifts throughout the world.	Intro	No	Elon University	No	0	0.133
133	Biology	0-2	2009	No	7	Male	Europe	No	No	No	Yes	No	1	No	No	No	Coll, J., R. Abad, E. Alvarez, S. Deudero, R. Mas, F. Riera, and I. Moreno. 2009. STATE OF FISH POPULATIONS AND INFLUENCE ON THE TRAMMEL NET FISHERY AT THREE BALEARIC ISLAND (WESTERN MEDITERRANEAN) ARTIFICIAL REEFS A DECADE AFTER THEIR DEPLOYMENT. Bulletin of Marine Science 85:77-100.	Yes	Bulletin of Marine Science	Biology	Spain	This would be in agreement with the observed gradient [in anthropogenic fishing pressure] at Mallorca-Formentera and with the general evolution of current fisheries (Jukic-Peladic et al., 2001; Lleonart and Maynou, 2003; Myers and Worm, 2003; Coll et al., 2004; Worm et al., 2006).	Discussion	No	Direcció General de Pesca	No	0	1.148
134	Multidisciplinary	3-5	2008	No	5	Female	Europe	Yes	Yes	Yes	No	Yes	2	No	Yes	Yes	Coll, M., S. Libralato, S. Tudela, I. Palomera, and F. Pranovi. 2008. Ecosystem Overfishing in the Ocean. Plos One 3.	Yes	PLoS One	Multidisciplinary	Spain	Fisheries can […] and modify the structure and function of marine ecosystems [5,6] // These results confirm previous concerns about the sustainability of fishing activities at a global scale [5–6,8,16,30]	Intro	No	Institut de Cie`nces del Mar	No	0	4.092
135	Ecology	3-5	2008	Yes	3	Female	Canada	Yes	Yes	Yes	No	No	1	No	No	Yes	Coll, M., H. K. Lotze, and T. N. Romanuk. 2008. Structural degradation in Mediterranean Sea food webs: Testing ecological hypotheses using stochastic and mass-balance modelling. Ecosystems 11:939-960.	Yes	Ecosystems	Ecology	Canada	that have the potential to affect the structure and functioning of marine ecosystems and impair the maintenance of goods and services provided to humans (for example, Margalef 1968; Odum 1969, 1985; Pauly and others 1998; Steneck and Carlton 2001; Pauly and others 2002; Cury and others 2003; Lotze and others 2005; Jackson 2006; Worm and others 2006).	Intro	No	Dalhousie University	No	1	3.495
136	Multidisciplinary	3-5	2008	No	6	Female	Europe	No	Yes	Yes	No	No	1	No	Yes	No	Company, J. B., P. Puig, F. Sarda, A. Palanques, M. Latasa, and R. Scharek. 2008. Climate Influence on Deep Sea Populations. Plos One 3.	Yes	PLoS One	Multidisciplinary	Spain	Among the overexploited stocks worldwide [14,15]	Intro	No	Institut de Cie`ncies del Mar-Consejo Superior de Investigaciones Cientı´ficas	No	0	4.092
137	Ecology	2-3	2010	No	2	Female	Europe	No	No	No	No	No	1	No	No	No	Conti, L. and M. Scardi. 2010. Fisheries yield and primary productivity in large marine ecosystems. Marine Ecology-Progress Series 410:233-244.	Yes	Marine Ecology-Progress Series	Ecology	Italy	from 66 LMEs around the world, accounting for 83% of the global fisheries yield (Worm et al. 2006).	Methods	Yes	Tuscia University	No	0	2.711
138	Fisheries	0-2	2010	No	4	Male	Canada	No	No	No	Yes	No	1	No	No	Yes	Cooke, S. J., A. J. Danylchuk, M. J. Kaiser, and M. A. Rudd. 2010. Is there a need for a '100 questions exercise' to enhance fisheries and aquatic conservation, policy, management and research? Lessons from a global 100 questions exercise on conservation of biodiversity. Journal of Fish Biology 76:2261-2286.	Yes	Journal of Fish Biology	Fisheries	Canada	Fishes are integral components of aquatic ecosystems (both freshwater and marine), structuring communities and influencing a range of ecosystem processes and services (e.g. food chain dynamics, nutrient cycling and ecosystem resilience; Holmlund & Hammer, 1999; Worm et al., 2006).	Discussion	No	Carleton University	No	0	1.685
139	Ecology	>5	2007	No	3	Female	Europe	No	Yes	Yes	No	No	1	No	No	No	Costantini, F., C. Fauvelot, and M. Abbiati. 2007. Genetic structuring of the temperate gorgonian coral (Corallium rubrum) across the western Mediterranean Sea revealed by microsatellites and nuclear sequences. Molecular Ecology 16:5168-5182.	Yes	Molecular Ecology	Ecology	Italy	Owing primarily to this disturbance, biogenic reefs in tropical and temperate habitats have suffered long-term degradation affecting both species and genetic diversities (Hellberg et al. 2002; Hughes et al. 2002; Pandolfi et al. 2003; Bellwood et al. 2004; Worm et al. 2006).	Intro	No	University of Bologna	No	0	5.522
140	Multidisciplinary	>5	2008	No	3	Male	USA	No	Yes	Yes	Yes	No	4	Yes	Yes	No	Costello, C., S. D. Gaines, and J. Lynham. 2008. Can catch shares prevent fisheries collapse? Science 321:1678-1681.	Yes	Science	Multidisciplinary	USA	and global collapses in large predatory fishes (4) and other trophic levels (5) in all large marine ecosystems (LMEs) (6). // We matched this institutional database to the same harvest database (18) used to assess fisheries collapse by Worm et al. (6) // In their widely cited contribution, Worm et al. (6) correlate the species richness of LMEs with fisheries collapse. They define a fishery as col…	Intro / Discussion	No	University of California, Santa Barbara	No	0	32.452
141	Other	0-2	2010	No	2	Male	USA	Yes	Yes	Yes	No	No	1	No	Yes	No	Costello, C. and D. T. Kaffine. 2010. Marine protected areas in spatial property-rights fisheries*. Australian Journal of Agricultural and Resource Economics 54:321-341.	Yes	Australian Journal of Agricultural and Resource Economics	Economics	USA	The collapse of many of the world’s fisheries (Jackson et al. 2001; Myers and Worm 2003; Worm et al. 2006)	Intro	No	University of California, Santa Barbara	No	0	1.061
142	Other	0-2	2010	No	4	Male	USA	No	No	No	Yes	No	8	Yes	Yes	No	Costello, C., J. Lynham, S. E. Lester, and S. D. Gaines. 2010. Economic Incentives and Global Fisheries Sustainability. Pages 299-318 in G. C. Rausser, V. K. Smith, and D. Zilberman, editors. Annual Review of Resource Economics, Vol 2, 2010.	Yes	Annual Review of Resource Economics	Economics	USA	The widespread collapse of fisheries that predominantly employ these forms of regulation has been well documented (Worm et al. 2006 and references therein). // In a widely cited contribution, Worm et al. (2006) document the alarming rate at which fisheries worldwide are collapsing. On the basis of a simple extrapolation of the observed collapse trend, they predict that all the world’s fisheries m…	Discussion	No	University of California, Santa Barbara	No	0	1.745
143	Other	2-3	2008	No	2	Male	USA	No	No	Yes	No	No	1	No	Yes	No	Costello, C. and S. Polasky. 2008. Optimal harvesting of stochastic spatial resources. Journal of Environmental Economics and Management 56:1-18.	Yes	Journal of Environmental Economics and Management	Economics	USA	Five decades hence, despite countless subsequent contributions by economists, many renewable resources are—by any performance measure—patently worse-off than they were in the 1950s [52,33,25].	Intro	No	University of California, Santa Barbara	No	0	2.169
144	Multidisciplinary	>5	2010	Yes	6	Male	USA	No	Yes	Yes	No	No	1	No	Yes	No	Costello, C., A. Rassweiler, D. Siegel, G. De Leo, F. Micheli, and A. Rosenberg. 2010. The value of spatial information in MPA network design. Proceedings of the National Academy of Sciences of the United States of America 107:18294-18299.	Yes	Proceedings of the National Academy of Sciences of the United States of America	Multidisciplinary	USA	Broad patterns of resource decline, increasing conflicts in coastal zones among competing users, and pressures from a complex set of human impacts are some of the reasons policy makers are turning to spatial management as an evolving paradigm for ocean policy (1, 2).	Intro	No	University of California, Santa Barbara	No	1	9.681
145	Biology	>5	2011	No	1	Female	Canada	No	Yes	Yes	No	No	1	No	Yes	No	Cote, I. M. 2011. Conservation Biology: The Many Ways to Protect Biodiversity. Current Biology 21:R468-R470.	Yes	Current Biology	Biology	Canada	Technology has improved to the point where virtually every part of the world’s oceans is now accessible to fishing and many fish stocks have been exhausted [1,2].	Intro	No	Simon Fraser University	No	0	9.647
146	Other	0-2	2009	No	2	Female	Canada	Yes	Yes	Yes	No	No	1	Yes	Yes	No	Cottee, S. Y. and P. Petersan. 2009. Animal Welfare and Organic Aquaculture in Open Systems. Journal of Agricultural & Environmental Ethics 22:437-461.	Yes	Journal of Agricultural & Environmental Ethics	Other	Canada	If maintained at their current yields, fisheries face uncertain futures, with predictions of global collapse by 2048 of all currently fished species (Worm et al. 2006).	Intro	No	University of Guelph	No	0	1.109
147	Other	>5	2011	No	3	Female	Europe	No	No	Yes	No	No	1	No	Yes	No	Coulthard, S., D. Johnson, and J. A. McGregor. 2011. Poverty, sustainability and human wellbeing: A social wellbeing approach to the global fisheries crisis. Global Environmental Change-Human and Policy Dimensions 21:453-463.	Yes	Global Environmental Change-Human and Policy Dimensions	Other	Northern Ireland	This shift in thinking [from being perceived as inexhaustible, to fisheries as a sector in crisis] has come none too soon given the ecological vulnerability of fisheries ecosystems (Pauly et al., 1998; Jackson et al., 2001; Myers and Worm, 2003; Worm et al., 2006).	Intro	No	University of Ulster	No	0	6.868
148	Ecology	None	2009	Yes	4	Female	USA	No	No	No	Yes	No	1	Yes	Yes	No	Crain, C. M., B. S. Halpern, M. W. Beck, and C. V. Kappel. 2009. Understanding and Managing Human Threats to the Coastal Marine Environment. Pages 39-62 in R. S. Ostfeld and W. H. Schlesinger, editors. Year in Ecology and Conservation Biology 2009.	Yes	Year in Ecology and Conservation Biology	Ecology	USA	and that most current fisheries will collapse in the next 50 years if management strategies are not altered (Worm et al. 2006).	Discussion	No	University of California, Santa Cruz	No	1	None
149	Ecology	>5	2008	Yes	3	Female	USA	No	No	No	Yes	No	1	No	No	No	Crain, C. M., K. Kroeker, and B. S. Halpern. 2008. Interactive and cumulative effects of multiple human stressors in marine systems. Ecology Letters 11:1304-1315.	Yes	Ecology Letters	Ecology	USA	Perhaps most notably, the paucity of studies that have carefully controlled for and tested the direct effect of fishing and how it interacts with other stressors is a critical research need given the demonstrated importance of fishing in changing marine ecosystems (Worm et al. 2006).	Discussion	No	University of California, Santa Cruz	No	1	17.557
150	Ecology	>5	2008	No	6	Male	USA	No	No	Yes	Yes	No	2	No	Yes	No	Crowder, L. B., E. L. Hazen, N. Avissar, R. Bjorkland, C. Latanich, and M. B. Ogburn. 2008. The Impacts of Fisheries on Marine Ecosystems and the Transition to Ecosystem-Based Management. Pages 259-278 Annual Review of Ecology Evolution and Systematics.	Yes	Annual Review of Ecology Evolution and Systematics	Ecology	USA	Fishing, in concert with other anthropogenic drivers of change, has resulted in a staggering loss of biodiversity (Worm et al. 2006) and may have unforeseen effects that propagate throughout ecosystems. // Food web alterations can result in trophic cascades, regime shifts, or, in the worst case, ecosystem collapse (Mangel & Levin 2005, National Research Council 2006, Worm et al. 2006).	Intro / Discussion	No	Duke University	No	0	14.373
151	Other	0-2	2009	No	4	Female	Europe	Yes	Yes	Yes	No	No	1	No	Yes	No	Cruz-Garcia, L., M. Minghetti, I. Navarro, and D. R. Tocher. 2009. Molecular cloning, tissue expression and regulation of liver X Receptor (LXR) transcription factors of Atlantic salmon (Salmo salar) and rainbow trout (Oncorhynchus mykiss). Comparative Biochemistry and Physiology B-Biochemistry & Molecular Biology 153:81-88.	Yes	Comparative Biochemistry and Physiology B-Biochemistry & Molecular Biology	Other	Spain	Around one third of fish in the human food basket are now farmed and, with global fisheries generally in decline, this proportion is showing an ever-increasing trend (FAO, 2006; Worms et al., 2006).	Intro	No	Universitat de Barcelona	No	0	1.923
152	Policy	0-2	2010	No	2	Male	Europe	No	No	No	Yes	No	1	No	No	Yes	Curtin, R. and R. Prellezo. 2010. Understanding marine ecosystem based management: A literature review. Marine Policy 34:821-830.	Yes	Marine Policy	Policy	Spain	Loss of biodiversity in the world’s oceans is increasingly impairing their ability to provide a range of services including seafood production, the filtration of pollutants and the maintenance of water quality among others [60].	Conclusions	No	AZTI-Tecnalia	No	0	1.865
153	Fisheries	2-3	2011	No	4	Male	Europe	No	No	Yes	Yes	No	4	Yes	Yes	No	Daan, N., H. Gislason, J. G. Pope, and J. C. Rice. 2011. Apocalypse in world fisheries? The reports of their death are greatly exaggerated. Ices Journal of Marine Science 68:1375-1378.	Yes	ICES Journal of Marine Science	Fisheries	The Netherlands	The prediction by Worm et al. (2006) that by 2048 all commercially exploited stocks will have collapsed through continuing overexploitation became a focal point for public and media concern about the state of world fisheries. // Worm et al. (2006) based their evaluation on the premise that a reported catch that is 10% of the historical maximum is a valid criterion for designating a stock as being…	Intro / Methods / Discussion	Yes	Waaldijk 39, 6621KH Dreumel	No	0	2.007
154	Biology	>5	2008	No	8	Male	Europe	No	Yes	Yes	Yes	No	3	No	No	Yes	Danovaro, R., C. Gambi, A. Dell'Anno, C. Corinaidesi, S. Fraschetti, A. Vanreusel, M. Vincx, and A. J. Gooday. 2008. Exponential decline of deep-sea ecosystem functioning linked to benthic biodiversity loss. Current Biology 18:1-8.	Yes	Current Biology	Biology	Italy	The global scale of the biodiversity crisis has stimulated investigations that explore the relationships between biodiversity (expressed as the number, identity, and relative abundance of species), productivity, stability, and services in different ecosystems of the world [1–5]. // Empirical and theoretical studies increasingly argue that biodiversity regulates the ecosystem functions that are re…	Intro / Discussion	No	Polytechnic University of Marche	No	0	9.647
155	Other	2-3	2007	No	2	Male	Europe	No	Yes	Yes	No	No	2	No	No	Yes	Danovaro, R. and A. Pusceddu. 2007. Biodiversity and ecosystem functioning in coastal lagoons: Does microbial diversity play any role? Estuarine Coastal and Shelf Science 75:4-12.	Yes	Estuarine Coastal and Shelf Science	Other	Italy	Recent studies, indeed, have suggested that the biodiversity decrease might reduce ecosystems’ services through feedback mechanisms (Worm et al., 2006) // Marine ecosystems are experiencing impacts of unprecedented intensity and frequency, which can directly and indirectly cause alterations of biodiversity, structure and organization of marine assemblages (Worm et al., 2006)	Intro	No	Polytechnic University of Marche	No	0	2.247
156	Ecology	0-2	2007	No	2	Male	Europe	No	No	No	Yes	No	1	No	No	Yes	Danovaro, R. and A. Pusceddu. 2007. Ecomanagement of biodiversity and ecosystem functioning in the Mediterranean Sea: concerns and strategies. Chemistry and Ecology 23:347-360.	Yes	Chemistry and Ecology	Ecology	Italy	The hypothesis that a loss of biodiversity might threaten an ecosystems’ functioning, thus reducing ecosystems’ services and value, postulated at the end of the 1990s [23] has recently been demonstrated for marine ecosystems [24]	Discussion	No	Università Politecnica delle Marche	No	0	0.615
157	Multidisciplinary	>5	2012	No	8	Female	Other	No	Yes	Yes	No	No	1	No	Yes	No	Davidson, A. D., A. G. Boyer, H. Kim, S. Pompa-Mansilla, M. J. Hamilton, D. P. Costa, G. Ceballos, and J. H. Brown. 2012. Drivers and hotspots of extinction risk in marine mammals. Proceedings of the National Academy of Sciences of the United States of America 109:3395-3400.	Yes	Proceedings of the National Academy of Sciences of the United States of America	Multidisciplinary	Mexico	Human activities are polluting, warming, and acidifying the oceans, melting sea ice, overharvesting fisheries, and altering entire food webs (1–4).	Intro	No	Universidad Nacional Autónoma de México	No	0	9.681
158	Policy	0-2	2009	No	4	Male	Europe	Yes	Yes	Yes	No	No	1	No	Yes	No	Davies, R. W. D., S. J. Cripps, A. Nickson, and G. Porter. 2009. Defining and estimating global marine fisheries bycatch. Marine Policy 33:661-672.	Yes	Marine Policy	Policy	Switzerland	One of the most urgent threats to the world’s remaining fish stocks is commercial fishing [1–3]	Intro	No	WWF International	No	0	1.865
159	Policy	0-2	2010	No	2	Male	Europe	No	No	Yes	No	No	2	No	No	Yes	Davies, R. W. D. and R. Rangeley. 2010. Banking on cod: Exploring economic incentives for recovering Grand Banks and North Sea cod fisheries. Marine Policy 34:92-98.	Yes	Marine Policy	Policy	Switzerland	Loss of marine biodiversity is now degrading the ecological health of the world’s oceans and impairing their capacity to provide food [4]. // There is now a substantial body of evidence linking biodiversity conservation to fisheries recovery and economic rejuvenation [2,4,9–11].	Intro	No	WWF International	No	0	1.865
160	Other	2-3	2010	No	4	Female	Europe	No	Yes	Yes	No	No	1	No	No	No	De Backer, A., C. Van Colen, M. Vincx, and S. Degraer. 2010. The role of biophysical interactions within the ijzermonding tidal flat sediment dynamics. Continental Shelf Research 30:1166-1179.	Yes	Continental Shelf Research	Other	Belgium	They [estuarine mudflats] are areas of both ecological and economic importance and are increasingly threatened by climatic and anthropogenic pressures (Dyer etal., 2000; Worm et al., 2006).	Intro	No	Ghent University	No	0	2.088
161	Fisheries	2-3	2010	No	4	Female	Europe	No	Yes	Yes	No	No	1	No	Yes	No	de la Torriente, A., R. A. Quinones, D. A. Miranda-Urbina, and F. Echevarria. 2010. South American sea lion and spiny dogfish predation on artisanal catches of southern hake in fjords of Chilean Patagonia. Ices Journal of Marine Science 67:294-303.	Yes	ICES Journal of Marine Science	Fisheries	Spain	and the global decline of fish populations, mainly through overfishing (Worm et al., 2006).	Intro	No	Universidad de Ca´diz	No	0	2.007
162	Multidisciplinary	>5	2008	No	4	Female	USA	No	No	Yes	Yes	No	4	No	Yes	No	de Mutsert, K., J. H. Cowan, T. E. Essington, and R. Hilborn. 2008. Reanalyses of Gulf of Mexico fisheries data: Landings can be misleading in assessments of fisheries and fisheries ecosystems. Proceedings of the National Academy of Sciences of the United States of America 105:2740-2744.	Yes	Proceedings of the National Academy of Sciences of the United States of America	Multidisciplinary	USA	We also investigated GOM landings data in reference to predictions of near-future collapses of fish populations analyzed in a high-profile article by Worm et al. (9). In this article, collapses were defined as a reduction in landings of a species to 10% of any previous annual catch level. // In contrast, almost 80% of GOM fisheries cumulatively would be designated as having collapsed (Fig. 2) by …	Intro / Methods / Discussion	Yes	Louisiana State University	No	0	9.681
163	Other	0-2	2008	No	11	Male	Other	No	No	No	Yes	No	2	No	No	Yes	del Monte-Luna, P., D. Lluch-Belda, R. Carmona, H. Reyes-Bonilla, J. L. Castro-Aguirre, E. Serviere-Zaragoza, D. Aurioles-Gamboa, S. A. G. del Proo, O. Trujillo-Millan, J. F. Elorduy-Garay, and B. W. Brook. 2008. Extinctions in the sea: Myths and realities. Interciencia 33:74-80. [in spanish]	Yes	Interciencia	Other	Mexico	The most extreme and undesirable effects of these factors and other activities, acting individually or jointly together are the extinction of species and corresponding environmental costs, effects that reduce the quality and quantity of goods and services we get from our environment natural (Worm et al., 2006). / / And still are allowing research to develop a theoretical framework regarding the s…	Discussion	No	Instituto Politécnico Nacional (CICIMAR-IPN)	No	0	0.308
164	Multidisciplinary	3-5	2012	No	3	Male	Other	No	No	No	Yes	No	1	No	No	No	Doi, H., T. Takahara, and K. Tanaka. 2012. Trophic Position and Metabolic Rate Predict the Long-Term Decay Process of Radioactive Cesium in Fish: A Meta-Analysis. Plos One 7.	Yes	PLoS One	Multidisciplinary	Japan	Traditionally, higher trophic-level species are frequently fishery species that are collected and consumed by humans [26].	Discussion	No	Hiroshima University	No	0	4.092
165	Fisheries	2-3	2011	No	7	Male	Canada	No	No	No	Yes	No	1	No	Yes	No	Donaldson, M. R., C. M. O'Connor, L. A. Thompson, A. J. Gingerich, S. E. Danylchuk, R. R. Duplain, and S. J. Cooke. 2011. Contrasting Global Game Fish and Non-Game Fish Species. Fisheries 36:385-397.	Yes	Fisheries	Fisheries	Canada	The intensive commercial harvest of fishes has been implicated in the widespread declines of fish populations worldwide (Christensen et al. 2003; Dulvy et al. 2003; Pauly et al. 2003; Worm et al. 2006)	Discussion	No	Carleton University	No	0	2.367
166	Other	2-3	2010	No	8	Male	Other	No	Yes	Yes	No	No	1	No	Yes	No	dos Santos, R. G., A. S. Martins, E. Torezani, C. Baptistotte, J. D. Farias, P. A. Horta, T. M. Work, and G. H. Balazs. 2010. Relationship between fibropapillomatosis and environmental quality: a case study with Chelonia mydas off Brazil. Diseases of Aquatic Organisms 89:87-95.	Yes	Diseases of Aquatic Organisms	Other	Brazil	The development of coastal regions is exerting increasing adverse impact on coastal ecosystems, sometimes leading to the exclusion or extinction of species (Daszak et al. 2000, Worm et al. 2006).	Intro	No	Universidade Federal do Espírito Santo	No	0	2.201
167	Other	3-5	2007	No	4	Female	Canada	No	Yes	Yes	No	No	1	Yes	Yes	No	Douglas, S. E., L. C. Knickle, J. Kimball, and M. E. Reith. 2007. Comprehensive EST analysis of Atlantic halibut (Hippoglossus hippoglossus), a commercially relevant aquaculture species. Bmc Genomics 8.	Yes	BMC Genomics	Other	Canada	With the general worldwide decline in the wild fishery, and the predicted global collapse of all currently fished species by the year 2048 [1]	Intro	No	Institute for Marine Biosciences	No	0	4.073
168	Ecology	>5	2008	Yes	3	Male	USA	No	No	No	Yes	No	1	No	No	No	Douglass, J. G., J. E. Duffy, and J. F. Bruno. 2008. Herbivore and predator diversity interactively affect ecosystem properties in an experimental marine community. Ecology Letters 11:598-608.	Yes	Ecology Letters	Ecology	USA	This supports the balanced diet hypothesis (DeMott 1998; Gamfeldt et al. 2005), which appears to hold in many marine consumers (Worm et al. 2006; Stachowicz et al. 2007)	Discussion	No	College of William and Mary	No	1	17.557
169	Other	3-5	2010	Yes	4	Male	USA	No	No	Yes	No	No	1	No	No	No	Douglass, J. G., K. E. France, J. P. Richardson, and J. E. Duffy. 2010. Seasonal and interannual change in a Chesapeake Bay eelgrass community: Insights into biotic and abiotic control of community structure. Limnology and Oceanography 55:1499-1520.	Yes	Limnology and Oceanography	Oceanography	USA	Seagrasses form productive and species-rich habitats in coastal areas throughout the world (Hemminga and Duarte 2000), where they contribute to human well-being by stabilizing sediments, improving water quality, and enhancing fisheries resources (Worm et al. 2006).	Intro	No	Virginia Institute of Marine Science	No	1	3.416
170	Policy	0-2	2008	No	1	Female	Europe	No	No	No	Yes	No	1	No	No	Yes	Douvere, F. 2008. The importance of marine spatial planning in advancing ecosystem-based sea use management. Marine Policy 32:762-771.	Yes	Marine Policy	Policy	France	Last year, a group of leading scientists concluded in Science that, ‘‘the loss of marine biodiversity is increasingly impairing the ocean’s ability to produce seafood, resist diseases, filter pollutants, maintain water quality and recover from perturbations such as over-fishing and climate change’’ [6].	Discussion	No	UNESCO	No	0	1.865
171	Policy	3-5	2009	No	2	Female	Europe	No	Yes	Yes	No	No	1	No	No	Yes	Douvere, F. and C. N. Ehler. 2009. New perspectives on sea use management: Initial findings from European experience with marine spatial planning. Journal of Environmental Management 90:77-88.	Yes	Journal of Environmental Management	Policy	France	Recently a group of leading scientists concluded in Science that ‘the loss of marine biodiversity is increasingly impairing the oceans’ ability to produce seafood, resist diseases, filter pollutants, maintain water quality and recover from perturbations such as over-fishing and climate change.’ (Worm et al., 2006)	Intro	No	UNESCO	No	0	3.245
172	Other	0-2	2010	No	3	Female	USA	No	Yes	Yes	No	No	1	No	No	No	Draughon, L. D., J. Scarpa, and J. X. Hartmann. 2010. Are filtration rates for the rough tunicate Styela plicata independent of weight or size? Journal of Environmental Science and Health Part a-Toxic/Hazardous Substances & Environmental Engineering 45:168-176.	Yes	Journal of Environmental Science and Health Part a-Toxic/Hazardous Substances & Environmental Engineering	Other	USA	Agricultural run-off of fertilizers and pesticides result in eutrophication[3,4,7-9]	Intro	No	Florida Atlantic University	No	0	1.19
173	Conservation	3-5	2008	No	4	Male	USA	No	No	No	Yes	No	1	No	Yes	No	Drew, J., G. R. Allen, L. Kaufman, and P. H. Barber. 2008. Endemism and regional color and genetic differences in five putatively cosmopolitan reef fishes. Conservation Biology 22:965-975.	Yes	Conservation Biology	Conservation	USA	This complexity combined with the critical state of decline in marine ecosystems (Worm et al. 2006)	Discussion	No	Boston University	No	0	4.692
174	Other	2-3	2009	No	4	Male	Europe	No	No	No	Yes	No	1	No	Yes	No	Duarte, C. M., D. J. Conley, J. Carstensen, and M. Sanchez-Camacho. 2009. Return to Neverland: Shifting Baselines Affect Eutrophication Restoration Targets. Estuaries and Coasts 32:29-36.	Yes	Estuaries and Coasts	Other	Spain	Fish and invertebrate taxa lost from large marine ecosystems (% relative to 1950) 5–17% (1970) 20–80% (2005); disruption of food webs and ecosystem processes Worm et al. (2006)	Discussion	No	Instituto Mediterráneo de Estudios Avanzados	No	0	2.109
175	Ecology	>5	2007	Yes	6	Male	USA	No	No	No	Yes	Yes	3	No	No	Yes	Duffy, J. E., B. J. Cardinale, K. E. France, P. B. McIntyre, E. Thebault, and M. Loreau. 2007. The functional role of biodiversity in ecosystems: incorporating trophic complexity. Ecology Letters 10:522-538.	Yes	Ecology Letters	Ecology	USA	Increasing prey richness increases consumer performance (balanced diet hypothesis) [Empirical test Worm et al. 2006] // Several empirical studies are consistent with the balanced diet hypothesis in that mixed diets of primary producers enhanced herbivore growth and biomass accumulation compared with single-species diets (e.g. DeMott 1998; Pfisterer et al. 2003; Worm et al. 2006). // using biogeog…	Discussion	No	College of William and Mary	Yes	1	17.557
176	Fisheries	0-2	2011	No	2	Male	Other	No	No	Yes	Yes	No	2	No	No	Yes	Dumont, L. F. C. and F. D'Incao. 2011. By-catch analysis of Argentinean prawn Artemesia longinaris (Decapoda: Penaeidae) in surrounding area of Patos Lagoon, southern Brazil: effects of different rainfall. Journal of the Marine Biological Association of the United Kingdom 91:1059-1072.	Yes	Journal of the Marine Biological Association of the United Kingdom	Fisheries	Brazil	Recently, much interest has been shown related to the ecosystem-based management, which is intended to evaluate the effects of fishing on the entire community and not only on the target species (Vasconcellos & Gasalla, 2001; Hall & Mainprize, 2005; Zeller & Pauly, 2005; Worm et al., 2006). // Recent experiments showed that ecosystems presenting higher diversity have more ability to withstand envi…	Intro & Discussion	No	Universidade Federal do Rio Grande	No	0	1
177	Biology	>5	2009	No	2	Female	USA	Yes	Yes	Yes	No	No	1	No	No	Yes	Dunne, J. A. and R. J. Williams. 2009. Cascading extinctions and community collapse in model food webs. Philosophical Transactions of the Royal Society B-Biological Sciences 364:1711-1723.	Yes	Philosophical Transactions of the Royal Society B-Biological Sciences	Biology	USA	The threat of extensive current and future biodiversity loss [...omitted...] including implications for ecosystem properties, services and functioning (Naeem et al. 1994; Chapin et al. 2000; Solan et al. 2004; Zavaleta & Hulvey 2004; Bunker et al. 2005; Dobson et al. 2006; Worm et al. 2006).	Intro	No	Santa Fe Institute	No	0	6.401
178	Conservation	0-2	2008	No	14	Male	USA	No	No	Yes	No	No	1	No	No	No	Edgar, G. J., P. F. Langhammer, G. Allen, T. M. Brooks, J. Brodie, W. Crosse, N. De Silva, L. D. C. Fishpool, M. N. Foster, D. H. Knox, J. E. McCosker, R. McManus, A. J. K. Millar, and R. Mugo. 2008. Key biodiversity areas as globally significant target sites for the conservation of marine biological diversity. Aquatic Conservation-Marine and Freshwater Ecosystems 18:969-983.	Yes	Aquatic Conservation-Marine and Freshwater Ecosystems	Conservation	USA	Central to conservation planning is the question: ‘How can the locations of protected areas be best identified?’ This question is particularly pertinent within the field of marine planning given increasing recognition of the extent of deterioration in the marine environment and the potential importance of the role of marine protected areas (MPAs) (Roberts and Hawkins, 1999; Dulvy et al., 2003; Gl…	Intro	No	Conservation International	No	0	1.929
179	Fisheries	0-2	2008	No	5	Male	USA	Yes	Yes	Yes	No	No	1	No	Yes	No	Eggleston, D. B., E. G. Johnson, G. T. Kellison, G. R. Plaia, and C. L. Huggett. 2008. Pilot evaluation of early juvenile blue crab stock enhancement using a replicated BACI design. Reviews in Fisheries Science 16:91-100.	Yes	Reviews in Fisheries Science	Fisheries	USA	The continuous global decline of major fishery species (Food and Agriculture Organization [FAO] Report, 2001; Worm et al., 2006)	Intro	No	North Carolina State University	No	0	1.946
180	Policy	0-2	2010	No	5	Female	USA	No	Yes	Yes	No	No	1	No	No	No	Ekstrom, J. A., G. T. Lau, D. J. Spiteri, J. C. P. Cheng, and K. H. Law. 2010. MINOE: A Software Tool to Analyze Ocean Management Efforts in the Context of Ecosystems. Coastal Management 38:457-473.	Yes	Coastal Management	Policy	USA	There has been an increased effort to compile, model, and synthesize ecological and biophysical data (Dunn & Halpin, 2009; Halpern et al., 2008; Myers & Worm, 2003; Worm et al., 2006).	Intro	No	Stanford University	No	0	1.194
181	Multidisciplinary	3-5	2011	No	11	Female	USA	No	No	No	Yes	No	1	No	No	Yes	Ellis, S. L., L. S. Incze, P. Lawton, H. Ojaveer, B. R. MacKenzie, C. R. Pitcher, T. C. Shirley, M. Eero, J. W. Tunnell, P. J. Doherty, and B. M. Zeller. 2011. Four Regional Marine Biodiversity Studies: Approaches and Contributions to Ecosystem-Based Management. Plos One 6.	Yes	PLoS One	Multidisciplinary	USA	We note that globally, numerous studies have looked at human impacts on biodiversity composition and structure [161,162]	Discussion	No	University of Southern Maine	No	0	4.092
182	Policy	0-2	2012	No	4	Male	Other	No	No	Yes	No	No	1	No	Yes	No	Emery, T. J., B. S. Green, C. Gardner, and J. Tisdell. 2012. Are input controls required in individual transferable quota fisheries to address ecosystem based fisheries management objectives? Marine Policy 36:122-131.	Yes	Marine Policy	Policy	Australia	The ecosystem effects of marine fisheries are the subject of much scrutiny, in particular, the depletion of target fish stocks [29,30]	Intro	No	University of Tasmania	No	0	1.865
183	Multidisciplinary	2-3	2011	No	7	Male	Europe	No	No	No	Yes	No	1	No	No	No	Eriksson, B. K., K. Sieben, J. Eklof, L. Ljunggren, J. Olsson, M. Casini, and U. Bergstrom. 2011. Effects of Altered Offshore Food Webs on Coastal Ecosystems Emphasize the Need for Cross-Ecosystem Management. Ambio 40:786-797.	Yes	Ambio	Multidisciplinary	The Netherlands	However, offshore fisheries and coastal exploitation are global forces that have had significant effects on continental seas world-wide (Lotze et al. 2006, Worm et al. 2006)	Discussion	No	University of Groningen	No	0	2.025
184	Ecology	3-5	2010	No	6	Male	Europe	Yes	Yes	Yes	Yes	No	2	No	Yes	Yes	Eriksson, B. K., T. van der Heide, J. van de Koppel, T. Piersma, H. W. van der Veer, and H. Olff. 2010. Major Changes in the Ecology of the Wadden Sea: Human Impacts, Ecosystem Engineering and Sediment Dynamics. Ecosystems 13:752-764.	Yes	Ecosystems	Ecology	The Netherlands	Across the world, human dominated coastal ecosystems are losing populations and species at an accelerating rate, with a strong risk of permanent impairment to key ecosystem functions and recovery potential (Lotze and others 2006; Worm and others 2006). // Globally, as well as for the Wadden Sea, off-shore food-webs have undergone massive changes over the last decades due to overexploitation of th…	Intro / Discussion	No	University of Groningen	No	0	3.495
185	Fisheries	2-3	2011	No	6	Male	USA	No	No	No	Yes	No	1	No	No	No	Erisman, B. E., L. G. Allen, J. T. Claisse, D. J. Pondella, E. F. Miller, and J. H. Murray. 2011. The illusion of plenty: hyperstability masks collapses in two recreational fisheries that target fish spawning aggregations. Canadian Journal of Fisheries and Aquatic Sciences 68:1705-1716.	Yes	Canadian Journal of Fisheries and Aquatic Sciences	Fisheries	USA	Barred sand bass and kelp bass stocks in southern California have collapsed, based on the criteria set by several organizations and fisheries studies (Hutchings 2001; Worm et al. 2006; FAO 2009).	Discussion	No	Scripps Institution of Oceanography	No	0	2.213
186	Other	2-3	2009	No	2	Male	Europe	No	No	No	Yes	No	1	No	Yes	No	Erlandsson, J. and A. M. Tillman. 2009. Analysing influencing factors of corporate environmental information collection, management and communication. Journal of Cleaner Production 17:800-810.	Yes	Journal of Cleaner Production	Other	Sweden	although many fish stocks are being depleted to the verge of collapse [35].	Discussion	No	Chalmers University of Technology	No	0	2.727
187	Multidisciplinary	>5	2008	No	1	Male	USA	No	No	No	Yes	No	1	No	No	Yes	Erwin, D. H. 2008. Extinction as the loss of evolutionary history. Proceedings of the National Academy of Sciences of the United States of America 105:11520-11527.	Yes	Proceedings of the National Academy of Sciences of the United States of America	Multidisciplinary	USA	Ecological studies have demonstrated that the loss of biodiversity can imperil ecosystem services and functions (50–55), potentially leading to a negative feedback loop further reducing diversity.	Discussion	No	National Museum of Natural History	No	0	9.681
188	Other	2-3	2010	No	3	Male	USA	No	Yes	Yes	No	No	1	No	Yes	Yes	Erwin, P. M., S. Lopez-Legentil, and P. W. Schuhmann. 2010. The pharmaceutical value of marine biodiversity for anti-cancer drug discovery. Ecological Economics 70:445-451.	Yes	Ecological Economics	Economics	USA	The resulting loss of marine biodiversity, triggered on a global scale by direct and indirect anthropogenic disturbances, has led to exponential reductions in service yield, resource devaluation and, if unabated, resource collapse (Worm et al., 2006)	Intro	No	University of North Carolina	No	0	2.713
189	Fisheries	0-2	2010	No	2	Male	USA	Yes	Yes	Yes	No	No	2	No	Yes	No	Etnier, M. A. and C. W. Fowler. 2010. Size Selectivity in Marine Mammal Diets as a Guide to Evolutionarily Enlightened Fisheries Management. North American Journal of Fisheries Management 30:588-603.	Yes	North American Journal of Fisheries Management	Fisheries	USA	An increasing number of studies suggests that in many cases, the commercial harvest of fish stocks is managed in a way that is not sustainable (Rosenberg 2003; U.S. Commission on Ocean Policy 2004; Worm et al. 2006; Jørgensen et al. 2007). // In most cases, commercial fishing as currently practiced in many of the world’s oceans is not sustainable over the long term; total removals are typically s…	Intro	No	Applied Osteology	No	0	0.943
190	Other	2-3	2010	No	5	Male	USA	No	No	No	Yes	No	1	No	No	Yes	Farley, J., A. Aquino, A. Daniels, A. Moulaert, D. Lee, and A. Krause. 2010. Global mechanisms for sustaining and enhancing PES schemes. Ecological Economics 69:2075-2084.	Yes	Ecological Economics	Economics	USA	Abundant evidence suggests that biodiversity enhances both the productivity and stability of ecosystems, maintaining resilience in the presence of shocks and ensuring the continued provision of ecosystem services (Chapin et al., 1998; Gowdy, 1997; Naeem, 1998; Odum, 1989; Tilman and Downing, 1994; Worm et al., 2006).	Discussion	No	University of Vermont	No	0	2.713
191	Policy	0-2	2010	No	4	Male	USA	No	No	No	Yes	No	1	No	No	Yes	Farley, J., D. Batker, I. de la Torre, and T. Hudspeth. 2010. Conserving Mangrove Ecosystems in the Philippines: Transcending Disciplinary and Institutional Borders. Environmental Management 45:39-51.	Yes	Environmental Management	Policy	USA	Both biodiversity and climate stability are almost certainly critical to the functioning of global ecosystems (Millennium Ecosystem Assessment 2005; Worm and others 2006).	Discussion	No	University of Vermont	No	0	1.744
192	Multidisciplinary	3-5	2010	No	18	Female	USA	No	No	Yes	No	No	3	No	No	Yes	Fautin, D., P. Dalton, L. S. Incze, J. A. C. Leong, C. Pautzke, A. Rosenberg, P. Sandifer, G. Sedberry, J. W. Tunnell, I. Abbott, R. E. Brainard, M. Brodeur, L. G. Eldredge, M. Feldman, F. Moretzsohn, P. S. Vroom, M. Wainstein, and N. Wolff. 2010. An Overview of Marine Biodiversity in United States Waters. Plos One 5.	Yes	PLoS One	Multidisciplinary	USA	Specifically, there are impacts to tourism, loss of aesthetic and other cultural attributes, lowered property values, and increased health risks to humans and animals from harmful algal blooms and their toxins, infectious disease organisms, and chemical contaminants [6,7]. // Ecosystems can undergo rapid change in their ability to provide a range of ecosystem services as biodiversity changes [6] …	Intro	No	University of Kansas	No	0	4.092
193	Policy	0-2	2007	No	2	Male	USA	No	No	Yes	No	No	1	No	No	Yes	Fayram, A. H. and A. de Risi. 2007. The potential compatibility of offshore wind power and fisheries: An example using bluefin tuna in the Adriatic Sea. Ocean & Coastal Management 50:597-605.	Yes	Ocean & Coastal Management	Policy	USA	Increases in biodiversity and size of individual fish are undoubtedly beneficial in some regards […omitted...]and may add to the stability of ecosystems in general [37].	Intro	No	Wisconsin Department of Natural Resources	No	0	1.333
194	Biology	2-3	2007	No	1	Male	Other	No	No	Yes	No	No	1	No	No	Yes	Feary, D. A. 2007. The influence of resource specialization on the response of reef fish to coral disturbance. Marine Biology 153:153-161.	Yes	Marine Biology	Biology	Australia	There is increasing evidence of widespread global alteration and loss of shallow marine habitats (Watling and Norse 1998; Frouin 2000; Kennish 2002; Thompson et al. 2002) and their associated biodiversity (Roberts et al. 2002; Dulvy et al. 2003; Worm et al. 2006).	Intro	No	James Cook University	No	0	2.276
195	Fisheries	0-2	2012	No	9	Male	Other	No	No	Yes	No	No	1	No	No	No	Field, I. C., R. C. Buckworth, G. J. Yang, M. G. Meekan, G. Johnson, J. D. Stevens, R. D. Pillans, C. R. McMahon, and C. J. A. Bradshaw. 2012. Changes in size distributions of commercially exploited sharks over 25 years in northern Australia using a Bayesian approach. Fisheries Research 125:262-271.	Yes	Fisheries Research	Fisheries	Australia	The implications of removing these top-order predators and the potential effects on marine ecosystem function are poorly understood and as yet unresolved (Coll et al., 2006; Jackson et al., 2001; Myers et al., 2007; Stevens et al., 2000a; Walker, 1998; Ward and Myers, 2005; Worm et al., 2006).	Intro	No	Macquarie University	No	0	1.586
196	Fisheries	>5	2009	No	4	Male	Other	Yes	Yes	Yes	No	No	1	No	No	Yes	Field, I. C., M. G. Meekan, R. C. Buckworth, and C. J. A. Bradshaw. 2009. Protein mining the world's oceans: Australasia as an example of illegal expansion-and-displacement fishing. Fish and Fisheries 10:323-328.	Yes	Fish and Fisheries	Fisheries	Australia	The spatial extent of anthropogenic threats to global marine biodiversity and ecosystem stability (Ludwig et al. 1993; Halpern et al. 2008) is ever-increasing and threatens the livelihoods and services on which humanity depends (Worm et al. 2006).	Intro	No	Charles Darwin University	No	0	5.8
197	Biology	2-3	2009	No	4	Male	Other	No	No	Yes	Yes	No	11	No	Yes	Yes	Field, I. C., M. G. Meekan, R. C. Buckworth, and C. J. A. Bradshaw. 2009. SUSCEPTIBILITY OF SHARKS, RAYS AND CHIMAERAS TO GLOBAL EXTINCTION. Pages 275-363 in D. W. Sims, editor. Advances in Marine Biology, Vol 56.	Yes	Advances in Marine Biology	Biology	Australia	marine habitats are likely to suffer increasing degradation and over-exploitation (Worm et al., 2006). // As a corollary, anthropogenic stresses and climatic changes have reduced the resilience of ecosystems in many locations around the globe by slowly degrading habitats and directly harvesting species, causing many ecosystems to switch unexpectedly into alternate states (Folke et al., 2004; Hugh…	Intro / Discussion	No	Charles Darwin University	No	0	2.043
198	Multidisciplinary	>5	2008	No	2	Female	USA	No	No	No	Yes	No	1	No	No	Yes	Finke, D. L. and W. E. Snyder. 2008. Niche partitioning increases resource exploitation by diverse communities. Science 321:1488-1490.	Yes	Science	Multidisciplinary	USA	Recent experimental manipulations of species richness have revealed, across a broad range of real world ecological communities, a general pattern of greater resource exploitation when more species are present (7–9).	Discussion	No	Washington State University	No	0	32.452
199	Conservation	3-5	2010	No	2	Female	USA	No	Yes	Yes	Yes	No	3	No	No	Yes	Finke, D. L. and W. E. Snyder. 2010. Conserving the benefits of predator biodiversity. Biological Conservation 143:2260-2269.	Yes	Biological Conservation	Conservation	USA	Concern over the ecological, economic, and social consequences of these drastic changes in community structure has spurred numerous investigations of the impact of changing biodiversity on ecosystem function and services (Balvanera et al., 2006; Cardinale et al., 2006a; Hooper et al., 2005; Worm et al., 2006). // Thus far, these experiments document that on average community performance is compro…	Intro / Discussion	No	University of Missouri	No	0	4.115
200	Other	0-2	2008	No	2	Male	USA	No	No	Yes	Yes	No	2	Yes	Yes	Yes	Finnoff, D. and J. Tschirhart. 2008. Linking dynamic economic and ecological general equilibrium models. Resource and Energy Economics 30:91-114.	Yes	Resource and Energy Economics	Economics	USA	This is consistent with Worm et al. (2006) who show how greater species richness, including species that are not economically exploited, leads to more stable populations of commercially important species. // In a high profile piece, Worm et al. (2006) report that current trends in overfishing and biodiversity loss project a global collapse of all commercial fishes by the middle of this century.	Intro / Conclusions	No	University of Wyoming	No	0	1.241
201	Other	0-2	2011	No	5	Male	USA	Yes	Yes	Yes	No	No	1	No	No	No	Fischer, D. T., J. W. White, L. W. Botsford, J. Largier, and D. M. Kaplan. 2011. A GIS-Based Tool for Representing Larval Dispersal for Marine Reserve Selection. Professional Geographer 63:489-513.	Yes	Professional Geographer	Other	USA	marine protected areas (MPAs) are growing in popularity as a tool for marine conservation and fisheries management (Lubchenco et al. 2003; Worm et al. 2006; Worm et al. 2009)	Intro	No	California State University	No	0	1.206
202	Ecology	3-5	2010	No	3	Male	Canada	No	No	No	Yes	Yes	1	No	No	Yes	Fisher, J. A. D., K. T. Frank, and W. C. Leggett. 2010. Breaking Bergmann's rule: truncation of Northwest Atlantic marine fish body sizes. Ecology 91:2499-2505.	Yes	Ecology	Ecology	Canada	Given these complexities, our results suggest that the current focus on maintaining or increasing taxonomic richness per se in biogeographic scale analyses of exploited ecosystems (Worm et al. 2006) is unwarranted.	Discussion	No	Queens University	No	0	4.849
203	Ecology	2-3	2010	No	3	Male	Canada	No	Yes	Yes	Yes	No	5	No	No	Yes	Fisher, J. A. D., K. T. Frank, and W. C. Leggett. 2010. Global variation in marine fish body size and its role in biodiversity-ecosystem functioning. Marine Ecology-Progress Series 405:1-13.	Yes	Marine Ecology-Progress Series	Ecology	Canada	Additionally, notwithstanding the positive correlations between species richness and the functioning of ecosystems at regional and global scales (Worm et al. 2006, Frank et al. 2007) // the previously reported positive relationships between species richness and LME functioning (Worm et al. 2006)// Meanwhile, a parallel and growing interest in the impact of species- and size-selective fisheries on…	Intro / Discussion	No	Queens University	No	0	2.711
204	Multidisciplinary	>5	2010	No	6	Male	USA	No	No	No	Yes	No	1	No	No	No	Flothmann, S., K. von Kistowski, E. Dolan, E. Lee, F. Meere, and G. Album. 2010. Closing Loopholes: Getting Illegal Fishing Under Control. Science 328:1235-1236.	Yes	Science	Multidisciplinary	USA	Impacts of fishing activities on the health of fish stocks and their supporting marine ecosystems ( 3, 12, 13)	Discussion	No	The Pew Charitable Trusts	No	0	32.452
205	Policy	0-2	2010	Yes	21	Female	USA	No	No	No	Yes	No	3	No	No	Yes	Foley, M. M., B. S. Halpern, F. Micheli, M. H. Armsby, M. R. Caldwell, C. M. Crain, E. Prahler, N. Rohr, D. Sivas, M. W. Beck, M. H. Carr, L. B. Crowder, J. E. Duffy, S. D. Hacker, K. L. McLeod, S. R. Palumbi, C. H. Peterson, H. M. Regan, M. H. Ruckelshaus, P. A. Sandifer, and R. S. Steneck. 2010. Guiding ecological principles for marine spatial planning. Marine Policy 34:955-966.	Yes	Marine Policy	Policy	USA	Species diversity, from local to global scales, can affect multiple ecosystem functions including maintenance of productivity [31,37] // Species diversity—the variety and abundance of species within an area or ecosystem—tends to be positively correlated with ecosystem health by increasing the functioning of marine ecosystems [29] and the provision of several ecosystem services [30–32]. // Maintai…	Discussion	No	Stanford University	No	4	1.865
206	Conservation	0-2	2011	No	8	Female	Europe	No	Yes	Yes	No	No	1	Yes	Yes	No	Follesa, M. C., R. Cannas, A. Cau, D. Cuccu, A. Gastoni, A. Ortu, C. Pedoni, and C. Porcu. 2011. Spillover effects of a Mediterranean marine protected area on the European spiny lobster Palinurus elephas (Fabricius, 1787) resource. Aquatic Conservation-Marine and Freshwater Ecosystems 21:564-572.	Yes	Aquatic Conservation-Marine and Freshwater Ecosystems	Conservation	Italy	Worm et al. (2006) stated that unless corrective measures are implemented immediately, many stocks of fish species of commercial interest will dwindle to almost nothing by 2050, causing upheavals in the global ecosystem.	Intro	No	University of Cagliari	No	0	1.929
207	Fisheries	2-3	2007	No	2	Male	Europe	Yes	Yes	Yes	No	No	1	No	Yes	No	Fonseca, D. B. and M. R. J. Sheehy. 2007. Does size matter? A cautionary experiment on overoptimism in length-based bioresource assessment. Canadian Journal of Fisheries and Aquatic Sciences 64:996-1008.	Yes	Canadian Journal of Fisheries and Aquatic Sciences	Fisheries	United Kingdom	In an era of globally declining fisheries (Worm et al. 2006)	Intro	No	University of Leicester	No	0	2.213
208	Biology	>5	2010	No	14	Male	Europe	No	No	No	Yes	Yes	1	No	Yes	No	Fontaine, M. C., K. A. Tolley, J. R. Michaux, A. Birkun, M. Ferreira, T. Jauniaux, A. Llavona, B. Ozturk, A. A. Ozturk, V. Ridoux, E. Rogan, M. Sequeira, J. M. Bouquegneau, and S. J. E. Baird. 2010. Genetic and historic evidence for climate-driven population fragmentation in a top cetacean predator: the harbour porpoises in European water. Proceedings of the Royal Society B-Biological Sciences 27…	Yes	Proceedings of the Royal Society B-Biological Sciences	Biology	Belgium	This reaction to climate change could however be exacerbated on a much shorter time scale by the depletion of major commercial fish stocks induced by intense commercial fisheries (Worm et al. 2006, 2009)	Discussion	No	University of Liege	No	0	5.415
209	Other	2-3	2008	No	4	Male	Europe	Yes	Yes	Yes	No	No	1	No	Yes	No	Forcada, A., J. T. Bayle-Sempere, C. Valle, and P. Sanchez-Jerez. 2008. Habitat continuity effects on gradients of fish biomass across marine protected area boundaries. Marine Environmental Research 66:536-547.	Yes	Marine Environmental Research	Other	Spain	In recent years, most coastal fish resources have been overexploited (Castilla, 2000), raising doubts about the long-term sustainability of certain fisheries (Pauly et al., 2002; Worm et al., 2006).	Intro	No	Unidad de Biología Marina	No	0	2.276
210	Ecology	2-3	2009	No	7	Male	Europe	No	Yes	Yes	No	No	1	No	Yes	No	Forcada, A., C. Valle, P. Bonhomme, G. Criquet, G. Cadiou, P. Lenfant, and J. L. Sanchez-Lizaso. 2009. Effects of habitat on spillover from marine protected areas to artisanal fisheries. Marine Ecology-Progress Series 379:197-211.	Yes	Marine Ecology-Progress Series	Ecology	Spain	Unless changes are implemented immediately, many fisheries may collapse in the next few decades (Worm et al. 2006).	Intro	No	Unidad de Biología Marina	No	0	2.711
211	Ecology	0-2	2010	No	2	Male	USA	Yes	Yes	Yes	No	No	2	No	No	No	Foster, M. S. and D. R. Schiel. 2010. Loss of predators and the collapse of southern California kelp forests (?): Alternatives, explanations and generalizations. Journal of Experimental Marine Biology and Ecology 393:59-70.	Yes	Journal of Experimental Marine Biology and Ecology	Ecology	USA	An increasing number of published papers argue that human induced alterations to food webs have resulted in the degradation of coastal ecosystems worldwide (e.g., Steneck et al., 2002; Springer et al., 2003; Bellwood et al., 2004; Berkes et al., 2006; Worm et al., 2006) // We assume it was used to characterize abundance when it fell below 10% of maximum since Jackson was one of the authors of Wor…	Intro / Methods	Yes	Moss Landing Marine Laboratories	No	0	1.875
212	Other	2-3	2009	No	23	Male	Europe	No	No	No	Yes	No	1	No	No	No	Fox, C., R. Harris, S. Sundby, E. Achterberg, J. I. Allen, J. Allen, A. Baker, C. P. D. Brussaard, P. Buckley, E. J. Cook, S. R. Dye, M. Edwards, L. Fernand, P. Kershaw, J. Metcalfe, S. Osterhus, T. Potter, E. Sakshaug, D. Speirs, E. Stenevik, M. S. John, F. Thingstad, and B. Wilson. 2009. TRANSREGIONAL LINKAGES IN THE NORTH-EASTERN ATLANTIC - AN 'END-TO-END' ANALYSIS OF PELAGIC ECOSYSTEMS. Pages…	Yes	Oceanography and Marine Biology: An Annual Review	Oceanography	United Kingdom	The introduction of non-indigenous species is widely recognised as a major threat to biodiversity (United Nations 1992, Worm et al. 2006)	Discussion	No	Dunstaffnage Marine Laboratory	No	0	2.727
213	Policy	0-2	2011	No	3	Female	USA	No	Yes	Yes	No	No	1	No	No	Yes	Francis, T. B., P. S. Levin, and C. J. Harvey. 2011. The perils and promise of futures analysis in marine ecosystem-based management. Marine Policy 35:675-681.	Yes	Marine Policy	Policy	USA	These changes are critically important because they directly impact the delivery of ecosystem goods and services that humans require or desire [5,6].	Intro	No	NWFSC, NOAA	No	0	1.865
214	Other	3-5	2007	No	2	Male	USA	No	No	No	Yes	No	1	No	No	No	Frank, K. and K. S. Min. 2007. INDICES OF ROBUSTNESS FOR SAMPLE REPRESENTATION. Pages 349-392 in Y. Xie, editor. Sociological Methodology 2007, Vol 37.	Yes	Sociological Methodology	Other	USA	Similarly we can quantify the robustness of inferences from meta-analyses with respect to generalizing to other populations or into the future (Worm et al. 2006).	Discussion	No	Michigan State University	No	0	3
215	Conservation	0-2	2011	No	7	Female	Europe	Yes	Yes	Yes	No	No	1	No	No	Yes	Fraschetti, S., G. Guarnieri, S. Bevilacqua, A. Terlizzi, J. Claudet, G. F. Russo, and F. Boero. 2011. Conservation of Mediterranean habitats and biodiversity countdowns: what information do we really need? Aquatic Conservation-Marine and Freshwater Ecosystems 21:299-306.	Yes	Aquatic Conservation-Marine and Freshwater Ecosystems	Conservation	Italy	Worldwide, ocean degradation is leading to an increasing depletion of biological diversity and associated goods and services to human welfare (Jackson et al., 2001; Worm et al., 2006; Halpern et al., 2007).	Intro	No	University of Salento	No	0	1.929
216	Ecology	0-2	2008	No	3	Female	Europe	No	No	Yes	No	No	1	No	No	No	Fraschetti, S., A. Terlizzi, and F. Boero. 2008. How many habitats are there in the sea (and where)? Journal of Experimental Marine Biology and Ecology 366:109-115.	Yes	Journal of Experimental Marine Biology and Ecology	Ecology	Italy	In the marine environment, the ecological impact of habitat changes is difficult to assess (Dobson et al., 2006; Worm et al., 2006; Halpern et al., 2007) because our understanding of the status and trends of marine habitats is surprisingly low	Intro	No	University of Salento	No	0	1.875
217	Other	3-5	2009	No	13	Male	Europe	No	No	Yes	No	No	1	No	No	Yes	Freon, P., J. Aristegui, A. Bertrand, R. J. M. Crawford, J. C. Field, M. J. Gibbons, J. Tam, L. Hutchings, H. Masski, C. Mullon, M. Ramdani, B. Seret, and M. Simieri. 2009. Functional group biodiversity in Eastern Boundary Upwelling Ecosystems questions the wasp-waist trophic structure. Progress in Oceanography 83:97-106.	Yes	Progress in Oceanography	Oceanography	France	controversy continues with respect to a general appreciation of the role of diversity in enhancing either ecosystem stability or productivity in open marine ecosystems (Worm et al., 2006; Longhurst, 2007).	Intro	No	Institut de Recherche pour le Développement	No	0	3.142
218	Other	0-2	2011	No	3	Male	USA	No	Yes	Yes	No	No	1	No	No	Yes	Friedland, K. D., P. D. Lynch, and C. J. Gobler. 2011. Time Series Mesoscale Response of Atlantic Menhaden Brevoortia tyrannus to Variation in Plankton Abundances. Journal of Coastal Research 27:1148-1158.	Yes	Journal of Coastal Research	Other	USA	Since the loss of system species diversity will impact the filter function service of coastal marine ecosystems (Elliot et al., 2007; Rothschild et al., 1994; Worm et al., 2006)	Intro	No	NMFS, NOAA	No	0	0.766
219	Ecology	2-3	2011	No	4	Male	USA	No	No	No	Yes	Yes	1	No	No	Yes	Frisk, M. G., T. J. Miller, R. J. Latour, and S. J. D. Martell. 2011. Assessing biomass gains from marsh restoration in Delaware Bay using Ecopath with Ecosim. Ecological Modelling 222:190-200.	Yes	Ecological Modelling	Ecology	USA	Recently, Worm et al. (2006) conducted a meta-analysis that did demonstrate advantages to biodiversity in fishery ecosystems.	Discussion	No	Stony Brook University	No	0	2.326
220	Policy	0-2	2009	No	3	Male	Europe	No	Yes	No	Yes	Yes	4	Yes	Yes	No	Froese, R., A. Stern-Pirlot, and K. Kesner-Reyes. 2009. Out of new stocks in 2020: A comment on "Not all fisheries will be collapsed in 2048". Marine Policy 33:180-181.	Yes	Marine Policy	Policy	Germany	He understands this as critique of Worm et al. [2] who predicted—if current trends continue—‘‘the global collapse of all taxa currently fished’’ by 2048. // Two of us [3] have published the original method used by Worm et al. [2] // We repeated the analysis of Worm et al. [2] // In summary, our analysis confirms the continuous absolute and relative increase in collapsed stocks shown first by Froe…	Discussion	No	Leibniz Institute of Marine Sciences, IFM-GEOMAR	No	0	1.865
221	Fisheries	0-2	2008	No	4	Male	Europe	No	Yes	Yes	No	No	1	No	Yes	No	Froese, R., A. Stern-Pirlot, H. Winker, and D. Gascuel. 2008. Size matters: How single-species management can contribute to ecosystem-based fisheries management. Fisheries Research 92:231-241.	Yes	Fisheries Research	Fisheries	Germany	In fact, despite increased efforts to improve management through better science, the number of overfished or collapsed stocks continues to increase (Worm et al., 2006).	Intro	No	Leibniz Institute of Marine Sciences, IFM-GEOMAR	No	0	1.586
222	Biology	2-3	2012	No	4	Male	Europe	No	No	Yes	Yes	No	2	No	Yes	No	Froese, R., D. Zeller, K. Kleisner, and D. Pauly. 2012. What catch data can tell us about the status of global fisheries. Marine Biology 159:1283-1292.	Yes	Marine Biology	Biology	Germany	In previous publications, we (Froese and Kesner-Reyes 2002, 2009; Froese and Pauly 2003; Pauly et al. 2008; Zeller et al. 2009; Kleisner and Pauly 2011) and others (Grainger and Garcia 1996; FAO 2010; Garibaldi 2012; Worm et al. 2006, 2007) have analyzed global catch data to gain insights into the status of global fisheries, revealing for example an increase in collapsed stocks and a decline in n…	Intro / Discussion	No	GEOMAR	No	0	2.276
223	Fisheries	>5	2011	No	11	Female	Other	No	No	No	Yes	No	1	No	No	No	Fulton, E. A., J. S. Link, I. C. Kaplan, M. Savina-Rolland, P. Johnson, C. Ainsworth, P. Horne, R. Gorton, R. J. Gamble, A. D. M. Smith, and D. C. Smith. 2011. Lessons in modelling and management of marine ecosystems: the Atlantis experience. Fish and Fisheries 12:171-188.	Yes	Fish and Fisheries	Fisheries	Australia	Most discussions of the topic [ecosystem-based management] have focused on a single ‘silver bullet’ solution such as spatial management (Worm et al. 2006)	Discussion	No	CSIRO Wealth from Oceans Flagship	No	0	5.8
224	Fisheries	>5	2011	No	4	Female	Other	Yes	Yes	Yes	Yes	No	4	No	Yes	No	Fulton, E. A., A. D. M. Smith, D. C. Smith, and I. E. van Putten. 2011. Human behaviour: the key source of uncertainty in fisheries management. Fish and Fisheries 12:2-17.	Yes	Fish and Fisheries	Fisheries	Australia	The problems with world fisheries and their solutions have been the focus of scientific and public debate for at least two decades (McGoodwin 1990; Casey and Myers 1998; Pauly et al. 1998; Hutchings 2000; Myers and Worm 2003; Essington et al. 2006; Parma et al. 2006; Worm et al. 2006; Beddington et al. 2007; Hilborn 2007a,b; Rijnsdorp et al. 2007; Costello et al. 2008; Dankel et al. 2008; Grafton…	Intro / Discussion	No	CSIRO Wealth from Oceans Flagship	No	0	5.8
225	Multidisciplinary	>5	2010	Yes	4	Male	USA	No	No	No	Yes	No	1	No	Yes	No	Gaines, S. D., C. White, M. H. Carr, and S. R. Palumbi. 2010. Designing marine reserve networks for both conservation and fisheries management. Proceedings of the National Academy of Sciences of the United States of America 107:18286-18293.	Yes	Proceedings of the National Academy of Sciences of the United States of America	Multidisciplinary	USA	Although these estimates are based on the extreme assumption that overexploitation has reduced local fished stocks to negligible levels in fished areas, overexploitation does exist in many parts of the world (38, 84, 85)	Discussion	No	University of California, Santa Barbara	No	1	9.681
226	Other	0-2	2011	No	2	Male	USA	No	Yes	Yes	No	No	2	No	No	No	Gallagher, A. J. and N. Hammerschlag. 2011. Global shark currency: the distribution, frequency, and economic value of shark ecotourism. Current Issues in Tourism 14:797-812.	Yes	Current Issues in Tourism	Other	USA	The drivers of these losses [ecosystem services] are numerous and include growing anthropogenic threats in the form of (but not limited to) habitat destruction, invasive species, pollution, climate change, and overfishing (e.g. Wilcove, Rothstein, Dubow, Phillips, & Losos, 1998; Worm et al., 2006; Worm & Lotze, 2009). // and marine apex-predators, particularly sharks, have experienced population …	Intro	No	University of Miami	No	0	0.836
227	Other	0-2	2008	No	2	Male	Europe	No	No	No	Yes	No	4	No	Yes	Yes	Gamfeldt, L. and H. Hillebrand. 2008. Biodiversity Effects on Aquatic Ecosystem Functioning - Maturation of a New Paradigm. International Review of Hydrobiology 93:550-564.	Yes	International Review of Hydrobiology	Other	Germany	Furthermore, analyses of data on marine biodiversity on both regional and global scales reveal that large-scale patterns of changes in biodiversity and ecosystem services correspond to those of experiments on a small temporal and spatial scale (WORM et al., 2006; DANOVARO et al., 2008). // For example, overexploitation of fish and shellfish in the oceans has resulted in dramatic shifts in many oc…	Discussion	No	University of Cologne	No	0	1.19
228	Ecology	3-5	2008	No	3	Male	Europe	No	No	No	Yes	No	1	No	No	No	Gamfeldt, L., H. Hillebrand, and P. R. Jonsson. 2008. Multiple functions increase the importance of biodiversity for overall ecosystem functioning. Ecology 89:1223-1231.	Yes	Ecology	Ecology	Germany	and the results from marine BEF [biodiversity–ecosystem function] experiments (e.g., Duffy et al 2003) appear to scale up to patterns found at regional and global scales (Worm et al. 2006).	Discussion	No	Goteberg University	No	0	4.849
229	Other	0-2	2010	No	3	Male	Other	No	No	No	Yes	No	1	No	No	Yes	Gaonkar, C. A., V. Krishnamurthy, and A. C. Anil. 2010. Changes in the abundance and composition of zooplankton from the ports of Mumbai, India. Environmental Monitoring and Assessment 168:179-194.	Yes	Environmental Monitoring and Assessment	Other	India	Nutrient levels are known to be an important determinant of marine biodiversity influencing the process of competition and community structure in the marine environment (Raghukumar and Anil 2003; Worm et al. 2006 and the references therein).	Discussion	No	National Institute of Oceanography	No	0	1.4
230	Conservation	0-2	2008	No	19	Male	Europe	No	Yes	Yes	No	No	1	Yes	Yes	No	Garcia-Charton, J. A., A. Perez-Ruzafa, C. Marcos, J. Claudet, F. Badalamenti, L. Benedetti-Cecchi, J. M. Falcon, M. Milazzo, P. J. Schembri, B. Stobart, F. Vandeperre, A. Brito, R. Chemello, M. Dimech, P. Domenici, I. Guala, L. Le Direach, E. Maggi, and S. Planes. 2008. Effectiveness of European Atlanto-Mediterranean MPAs: Do they accomplish the expected effects on populations, communities and e…	Yes	Journal for Nature Conservation	Conservation	Spain	Recently, Worm et al. (2006) stated that unless corrective measures are implemented with urgency, stocks of fish species of commercial interest will have completely collapsed by 2050,	Intro	No	Universidad de Murcia	No	0	1.864
231	Fisheries	0-2	2011	No	11	Male	Europe	No	No	No	Yes	No	1	No	No	Yes	Gascuel, D., N. Bez, A. Forest, P. Guillotreau, F. Laloe, J. Lobry, S. Mahevas, B. Mesnil, E. Rivot, S. Rochette, and V. Trenkel. 2011. A future for marine fisheries in Europe (Manifesto of the Association Francaise d'Halieumetrie). Fisheries Research 109:1-6.	Yes	Fisheries Research	Fisheries	France	Significant changes in the functioning of trophic networks, changes that convey a diminution of the functional biodiversity of the ecosystems, have also been observed (Heath, 2005; Pauly and Watson, 2005; Worm et al., 2006).	Discussion	No	Association Franc¸ aise d’Halieumétrie	No	0	1.586
232	Fisheries	0-2	2007	No	5	Male	Europe	No	Yes	Yes	No	No	1	Yes	Yes	No	Gascuel, D., P. Labrosse, B. Meissa, M. O. T. Sidl, and S. Guenette. 2007. Decline of demersal resources in North-West Africa: an analysis of Mauritanian trawl-survey data over the past 25 years. African Journal of Marine Science 29:331-345.	Yes	African Journal of Marine Science	Fisheries	France	This decline has been documented mostly on a large-scale basis, using mainly commercial catch statistics. This was the case, for instance, in the benchmark works of [...omitted...] and Worm et al. (2006) who predicted that all fish stocks worldwide would be overexploited by 2048.	Intro	No	Pôle halieutique Agrocampus Rennes	No	0	0.98
233	Biology	3-5	2011	No	1	Male	Europe	No	No	No	Yes	No	1	No	No	Yes	Gaston, K. J. 2011. Common Ecology. Bioscience 61:354-362.	Yes	Bioscience	Biology	United Kingdom	Numerous experimental and field studies have sought to document relationships between levels of species richness and ecosystem function (Cardinale et al. 2006, Worm et al. 2006)	Discussion	No	University of Sheffield	No	0	4.621
234	Multidisciplinary	>5	2010	Yes	12	Male	Other	No	Yes	Yes	No	No	1	No	Yes	No	Gelcich, S., T. P. Hughes, P. Olsson, C. Folke, O. Defeo, M. Fernandez, S. Foale, L. H. Gunderson, C. Rodriguez-Sickert, M. Scheffer, R. S. Steneck, and J. C. Castilla. 2010. Navigating transformations in governance of Chilean marine coastal resources. Proceedings of the National Academy of Sciences of the United States of America 107:16794-16799.	Yes	Proceedings of the National Academy of Sciences of the United States of America	Multidisciplinary	Chile	have demonstrably failed to halt or reverse environmental decline at a global scale (refs. 4 and 5…	Intro	No	Pontificia Universidad Católica de Chile	No	1	9.681
235	Policy	0-2	2008	No	1	Male	Other	No	Yes	Yes	No	No	1	No	Yes	No	Gibbs, M. T. 2008. Network governance in fisheries. Marine Policy 32:113-119.	Yes	Marine Policy	Policy	New Zealand	It is often assumed that the reason for this heightened awareness is the inability of management systems to effectively cap fishing effort which can lead to over-fishing and visible reductions in the availability of seafood for commercial, recreational, and customary take; as highlighted by a number of widely publicised reports on the state of global fisheries [1–4].	Intro	No	Cawthorn Institute	No	0	1.865
236	Policy	0-2	2009	No	1	Male	Other	No	No	No	Yes	No	1	No	No	No	Gibbs, M. T. 2009. Resilience: What is it and what does it mean for marine policymakers? Marine Policy 33:322-331.	Yes	Marine Policy	Policy	Australia	In fact, to quote from the Wealth of Nations: ‘The role of government is [… omitted…] to provide ‘‘certain public works and certain public institutions’’ (paraphrased from [20])’.	Discussion	No	CSIRO Marine and Atmospheric Sciences	No	0	1.865
237	Fisheries	>5	2010	No	16	Male	Other	No	No	Yes	No	No	1	No	No	No	Gilman, E., J. Gearhart, B. Price, S. Eckert, H. Milliken, J. Wang, Y. Swimmer, D. Shiode, O. Abe, S. H. Peckham, M. Chaloupka, M. Hall, J. Mangel, J. Alfaro-Shigueto, P. Dalzell, and A. Ishizaki. 2010. Mitigating sea turtle by-catch in coastal passive net fisheries. Fish and Fisheries 11:57-88.	Yes	Fish and Fisheries	Fisheries	Australia	This is because marine megafauna, once recovered to relatively pristine pre-human conditions, would resume their roles in coastal and marine ecosystem functioning and structure (Jackson et al. 2001; Leon and Bjorndal 2002; Bjorndal and Bolten 2003; Pandolfi et al. 2003; Moran and Bjorndal 2005, 2007; Stokstad 2006; Worm et al. 2006; Chaloupka et al. 2008)	Intro	No	IUCN	No	0	5.8
238	Biology	2-3	2010	No	24	Male	Europe	No	No	No	Yes	No	1	No	No	No	Glover, A. G., A. J. Gooday, D. M. Bailey, D. S. M. Billett, P. Chevaldonne, A. Colaco, J. Copley, D. Cuvelier, D. Desbruyeres, V. Kalogeropoulou, M. Klages, N. Lampadariou, C. Lejeusne, N. C. Mestre, G. L. J. Paterson, T. Perez, H. Ruhl, J. Sarrazin, T. Soltwedel, E. H. Soto, S. Thatje, A. Tselepides, S. Van Gaever, and A. Vanreusel. 2010. TEMPORAL CHANGE IN DEEP-SEA BENTHIC ECOSYSTEMS: A REVIEW…	Yes	Advances in Marine Biology	Biology	United Kingdom	A large literature exists on the impact of global industrialized fisheries both on fish stocks (e.g Pauly et al., 1998) and on the entire shelf ecosystem (e.g Worm et al., 2006).	Discussion	No	The Natural History Museum	No	0	2.043
239	Ecology	2-3	2009	No	2	Female	Europe	Yes	Yes	Yes	No	No	1	No	No	Yes	Godbold, J. A. and M. Solan. 2009. Relative importance of biodiversity and the abiotic environment in mediating an ecosystem process. Marine Ecology-Progress Series 396:273-282.	Yes	Marine Ecology-Progress Series	Ecology	United Kingdom	The effects of biodiversity loss on ecosystem processes have now been well established and numerous experimental studies have shown that, irrespective of the system under study, biodiversity loss has a negative effect on ecosystem properties (Balvanera et al. 2006, Cardinale et al. 2006, Worm et al. 2006).	Intro	No	University of Aberdeen	No	0	2.711
240	Ecology	>5	2010	No	4	Male	Other	No	No	No	Yes	No	1	No	Yes	No	Godoy, N., S. Gelcich, J. A. Vasquez, and J. C. Castilla. 2010. Spearfishing to depletion: evidence from temperate reef fishes in Chile. Ecological Applications 20:1504-1511.	Yes	Ecological Applications	Ecology	Chile	According to official landing information, since 1998 reef fish landings have declined to around 10% of historical levels; signaling fishery collapses according to collapsing criteria used by Worm et al. (2006).	Discussion	No	Pontificia Universidad Cato´lica de Chile	No	0	5.102
241	Other	3-5	2011	No	4	Male	Other	Yes	Yes	Yes	No	No	1	No	No	Yes	Goetze, J. S., T. J. Langlois, D. P. Egli, and E. S. Harvey. 2011. Evidence of artisanal fishing impacts and depth refuge in assemblages of Fijian reef fish. Coral Reefs 30:507-517.	Yes	Coral Reefs	Other	Australia	Exploitation of the marine environment is decreasing the ocean’s biodiversity and increasingly impairing the ocean’s capacity to provide food for human consumption (Worm et al. 2006).	Intro	No	The University of Western Australia	No	0	3.878
242	Other	0-2	2009	No	4	Male	USA	No	No	No	Yes	No	1	No	Yes	No	Gold, J. R., E. Saillant, N. D. Ebelt, and S. Lem. 2009. Conservation Genetics of Gray Snapper (Lutjanus griseus) in US Waters of the Northern Gulf of Mexico and Western Atlantic Ocean. Copeia:277-286.	Yes	Copeia	Other	USA	Other marine species have suffered similar declines in the recent past (less than 1,000 years) due to exploitation and habitat destruction (Worm et al., 2006)	Discussion	No	Texas A&M University	No	0	1.101
243	Multidisciplinary	>5	2011	No	5	Male	USA	No	Yes	Yes	No	No	1	No	No	No	Golden, C. D., L. C. H. Fernald, J. S. Brashares, B. J. R. Rasolofoniaina, and C. Kremen. 2011. Benefits of wildlife consumption to child nutrition in a biodiversity hotspot. Proceedings of the National Academy of Sciences of the United States of America 108:19653-19656.	Yes	Proceedings of the National Academy of Sciences of the United States of America	Multidisciplinary	USA	Surprisingly few studies have attempted to quantify the effects of wildlife declines on human economies and health (8, 9)	Intro	No	Harvard University	No	0	9.681
244	Multidisciplinary	3-5	2010	No	5	Female	Europe	Yes	Yes	Yes	No	No	1	No	No	No	Gollner, S., B. Riemer, P. M. Arbizu, N. Le Bris, and M. Bright. 2010. Diversity of Meiofauna from the 9 degrees 50 ' N East Pacific Rise across a Gradient of Hydrothermal Fluid Emissions. Plos One 5.	Yes	PLoS One	Multidisciplinary	Austria	Marine communities and ecosystem processes are affected by environmental changes, such as global warming, ocean hypoxia, and ocean acidification [1]	Intro	No	University of Vienna	No	0	4.092
245	Multidisciplinary	3-5	2008	No	16	Male	Europe	No	No	Yes	No	No	1	No	No	No	Graham, N. A. J., T. R. McClanahan, M. A. MacNeil, S. K. Wilson, N. V. C. Polunin, S. Jennings, P. Chabanet, S. Clark, M. D. Spalding, Y. Letourneur, L. Bigot, R. Galzin, M. C. Ohman, K. C. Garpe, A. J. Edwards, and C. R. C. Sheppard. 2008. Climate Warming, Marine Protected Areas and the Ocean-Scale Integrity of Coral Reef Ecosystems. Plos One 3.	Yes	PLoS One	Multidisciplinary	United Kingdom	Although there are expectations that NTAs [no-take areas] will promote resilience and faster recovery from climate disturbance [19]	Intro	No	Newcastle University	No	0	4.092
246	Other	0-2	2011	No	1	Female	Canada	No	No	No	Yes	No	1	Yes	Yes	No	Grant, L. K. 2011. Can We Consume Our Way Out of Climate Change? A Call for Analysis. Behavior Analyst 34:245-266.	Yes	Behavior Analyst	Other	Canada	Worm et al. (2006) have forecast a collapse in the world’s fish population by 2050 if current practices continue.	Discussion	No	Athabasca University	No	0	1.077
247	Ecology	>5	2010	No	7	Male	USA	Yes	Yes	Yes	No	No	1	No	Yes	No	Gratwicke, B., M. J. Evans, P. T. Jenkins, M. D. Kusrini, R. D. Moore, J. Sevin, and D. E. Wildt. 2010. Is the international frog legs trade a potential vector for deadly amphibian pathogens? Frontiers in Ecology and the Environment 8:438-442.	Yes	Frontiers in Ecology and the Environment	Ecology	USA	The overexploitation of wildlife for food (Figure 1), bush meat, wildlife-based medicines, and pets threatens wild animal and plant populations around the world (Sodhi et al. 2004; Karesh et al. 2005; Worm et al. 2006; Gratwicke et al. 2008).	Intro	No	Smithsonian’s National Zoological Park	No	0	9.113
248	Policy	0-2	2010	No	5	Male	Canada	Yes	Yes	Yes	No	No	1	No	Yes	No	Gray, D. L., R. R. Canessa, R. B. Rollins, P. Dearden, and C. P. Keller. 2010. Understanding Recreational Boater Attitudes to Zoning in a Proposed Marine Protected Area. Coastal Management 38:575-597.	Yes	Coastal Management	Policy	Canada	Anthropogenic impacts on marine environments are a concern worldwide (Worm et al., 2006; Ban & Alder, 2008).	Intro	No	University of Victoria	No	0	1.194
249	Ecology	>5	2010	No	2	Male	Europe	No	Yes	Yes	No	No	1	No	Yes	Yes	Gremillet, D. and A. Charmantier. 2010. Shifts in phenotypic plasticity constrain the value of seabirds as ecological indicators of marine ecosystems. Ecological Applications 20:1498-1503.	Yes	Ecological Applications	Ecology	France	These practices exhaust fish stocks and diminish marine biodiversity, thereby seriously threatening marine ecosystem structure and their resilience to natural environmental change (Worm et al. 2006). // There is ample evidence that this strategy [single-stock management] has failed and most likely has led to the current critical state of numerous marine ecosystems (Worm et al. 2006).	Intro	No	Centre d’Ecologie Fonctionnelle et Evolutive	No	0	5.102
250	Ecology	2-3	2010	No	7	Male	Europe	No	Yes	Yes	No	No	1	No	No	No	Griffin, J. N., L. Noel, T. P. Crowe, M. T. Burrows, S. J. Hawkins, R. C. Thompson, and S. R. Jenkins. 2010. Consumer effects on ecosystem functioning in rock pools: roles of species richness and composition. Marine Ecology-Progress Series 420:45-56.	Yes	Marine Ecology-Progress Series	Ecology	United Kingdom	In light of rapid and pervasive human alterations to biodiversity (Pimm et al. 1995, Worm et al. 2006, Byrnes et al. 2007)	Intro	No	Marine Biological Association of the United Kingdom	No	0	2.711
251	Policy	0-2	2009	No	1	Female	Europe	No	No	No	Yes	No	1	Yes	Yes	No	Griffin, L. 2009. Scales of knowledge: North Sea fisheries governance, the local fisherman and the European scientist. Environmental Politics 18:557-575.	Yes	Environmental Politics	Policy	United Kingdom	the frequently-cited international report proclaiming that global commercial fish stocks are in danger of collapse within the next 50 years (Worm et al. 2006)	Discussion	No	University of Westminster	No	0	1.398
252	Other	0-2	2010	No	1	Male	Europe	No	No	Yes	No	No	1	Yes	Yes	No	Grigorakis, K. 2010. Ethical Issues in Aquaculture Production. Journal of Agricultural & Environmental Ethics 23:345-370.	Yes	Journal of Agricultural & Environmental Ethics	Other	Greece	There are also some pessimistic predictions of global collapse of all currently fished species by 2048 if current yields maintain (Worm et al. 2006)	Intro	No	Institute of Aquaculture	No	0	1.109
253	Ecology	3-5	2011	No	4	Female	Europe	No	No	No	Yes	No	1	No	Yes	No	Grol, M. G. G., I. Nagelkerken, A. L. Rypel, and C. A. Layman. 2011. Simple ecological trade-offs give rise to emergent cross-ecosystem distributions of a coral reef fish. Oecologia 165:79-88.	Yes	Oecologia	Ecology	The Netherlands	Collapse of marine fisheries continues largely unabated, and large top predators usually are most affected (Pauly et al. 1998; Worm et al. 2006).	Discussion	No	Radboud University Nijmegen	No	0	3.412
254	Ecology	>5	2010	No	1	Male	USA	Yes	Yes	Yes	No	No	1	No	No	No	Grosholz, E. 2010. Avoidance by grazers facilitates spread of an invasive hybrid plant. Ecology Letters 13:145-153.	Yes	Ecology Letters	Ecology	USA	Biological invasions are among the most important and rapidly growing threats to human and natural systems worldwide (Mack et al. 2000; Sala et al. 2000; Worm et al. 2006)	Intro	No	University of California, Davis	No	0	17.557
255	Ecology	>5	2011	No	4	Male	USA	Yes	Yes	Yes	No	No	1	No	No	Yes	Grosholz, E., S. Lovell, E. Besedin, and M. Katz. 2011. Modeling the impacts of the European green crab on commercial shellfisheries. Ecological Applications 21:915-924.	Yes	Ecological Applications	Ecology	USA	Biological invasions are rapidly producing planetwide changes in biodiversity and ecosystem function (Chapin et al. 2000, Sala et al. 2000, Lotze et al. 2006, Worm et al. 2006)	Intro	No	University of California, Davis	No	0	5.102
256	Ecology	>5	2008	No	12	Male	USA	No	Yes	Yes	No	No	1	No	No	Yes	Gruner, D. S., J. E. Smith, E. W. Seabloom, S. A. Sandin, J. T. Ngai, H. Hillebrand, W. S. Harpole, J. J. Elser, E. E. Cleland, M. E. S. Bracken, E. T. Borer, and B. M. Bolker. 2008. A cross-system synthesis of consumer and nutrient resource control on producer biomass. Ecology Letters 11:740-755.	Yes	Ecology Letters	Ecology	USA	Similarly, human-caused changes in the intensity of top–down heterotrophic consumption, for example through release of top predators by trophic skew (Duffy 2003; Petchey et al. 2004; Worm et al. 2006) [… omitted…] can change the standing biomass and species composition of primary producers on broad scales.	Intro	No	University of Maryland	No	0	17.557
257	Conservation	3-5	2008	No	3	Female	USA	No	Yes	Yes	No	No	2	No	Yes	Yes	Guarderas, A. P., S. D. Hacker, and J. Lubchenco. 2008. Current Status of Marine Protected Areas in Latin America and the Caribbean. Conservation Biology 22:1630-1640.	Yes	Conservation Biology	Conservation	USA	Climate change, habitat destruction, pollution, introduced species, overfishing, and destructive impacts of some fishing gear severely threaten marine biodiversity worldwide (Jackson et al. 2001; Bellwood et al. 2004; MEA 2006; Wilson et al. 2006); all of these factors affect the delivery of marine ecosystem services (Balmford & Bond 2005; MEA 2006; Worm et al. 2006). // They [marine protected ar…	Intro	No	Oregon State University	No	0	4.692
258	Ecology	2-3	2011	No	3	Female	USA	Yes	Yes	Yes	No	No	1	No	No	No	Guarderas, A. P., S. D. Hacker, and J. Lubchenco. 2011. Ecological effects of marine reserves in Latin America and the Caribbean. Marine Ecology-Progress Series 429:219-U847.	Yes	Marine Ecology-Progress Series	Ecology	USA	Anthropogenic activities are increasingly affecting the world’s oceans (Jackson et al. 2001, Harley et al. 2006, Worm et al. 2006, Halpern et al. 2008).	Intro	No	Oregon State University	No	0	2.711
259	Biology	2-3	2012	No	4	Male	Europe	No	No	Yes	No	Yes	2	No	No	No	Guarnieri, G., A. Terlizzi, S. Bevilacqua, and S. Fraschetti. 2012. Increasing heterogeneity of sensitive assemblages as a consequence of human impact in submarine caves. Marine Biology 159:1155-1164.	Yes	Marine Biology	Biology	Italy	Tourism revenue, measured in terms of dive trips, can strongly increase in MPAs (Worm et al. 2006; Merino et al. 2009) // MPAs [marine protected areas] have been recently indicated as direct management and conservation actions that have successfully helped in habitat protection (Worm et al. 2006).	Intro	No	Universita` del Salento	No	0	2.276
260	Conservation	3-5	2011	No	4	Male	Europe	No	No	Yes	No	No	1	No	No	No	Guerra, A., A. F. Gonzalez, S. Pascual, and E. G. Dawe. 2011. The giant squid Architeuthis: An emblematic invertebrate that can represent concern for the conservation of marine biodiversity. Biological Conservation 144:1989-1997.	Yes	Biological Conservation	Conservation	Spain	This is despite the recognized ecological importance of marine invertebrate communities and the importance of preserving the biodiversity of marine ecosystems (Worm et al., 2006)	Intro	No	Instituto de Investigaciones Marinas (CSIC)	No	0	4.115
261	Ecology	3-5	2007	No	1	Male	Europe	Yes	Yes	Yes	No	No	2	No	No	Yes	Guidetti, P. 2007. Predator diversity and density affect levels of predation upon strongly interactive species in temperate rocky reefs. Oecologia 154:513-520.	Yes	Oecologia	Ecology	Italy	Increased concern over […omitted…] has fuelled renewed interest in the impacts of changes in biodiversity on ecosystem functions and services (Naeem et al. 1994; Chapin et al. 2000; Cardinale et al. 2002; Hooper et al. 2005; O’Connor and Crowe 2005; Worm et al. 2006) // Marine predators are particularly sensitive to extinction, since most of them are large slow-growing fish species that are heavi…	Intro	No	University of Salento	No	0	3.412
262	Other	2-3	2011	No	1	Male	Europe	Yes	Yes	Yes	No	No	2	No	No	Yes	Guidetti, P. 2011. The destructive date-mussel fishery and the persistence of barrens in Mediterranean rocky reefs. Marine Pollution Bulletin 62:691-695.	Yes	Marine Pollution Bulletin	Other	Italy	Fishing causes dramatic impacts on marine species, habitats and ecosystems (Thrush et al., 1998; Worm et al., 2006) // with negative consequences on biodiversity and/or ecosystem services (Worm et al., 2006; Lohrer et al., 2004)	Intro	No	University of Salento	No	0	2.503
263	Conservation	3-5	2010	No	2	Male	Europe	Yes	Yes	Yes	No	No	1	No	No	No	Guidetti, P. and J. Claudet. 2010. Comanagement Practices Enhance Fisheries in Marine Protected Areas. Conservation Biology 24:312-318.	Yes	Conservation Biology	Conservation	Italy	Fishing may have dramatic effects on species, habitats, and ecosystems (Botsford et al. 1997; Jackson et al. 2001; Worm et al. 2006)	Intro	No	University of Salento	No	0	4.692
264	Ecology	>5	2011	Yes	2	Male	Europe	Yes	Yes	Yes	No	No	1	No	No	No	Guidetti, P. and F. Micheli. 2011. Ancient art serving marine conservation. Frontiers in Ecology and the Environment 9:374-375.	Yes	Frontiers in Ecology and the Environment	Ecology	Italy	Fishing dramatically affects species, habitats, and ecosystems worldwide (Worm et al. 2006)	Intro	No	University of Salento	No	1	9.113
265	Conservation	3-5	2008	No	19	Male	Europe	No	No	No	Yes	No	1	No	Yes	Yes	Guidetti, P., M. Milazzo, S. Bussotti, A. Molinari, M. Murenu, A. Pais, N. Spano, R. Balzano, T. Agardy, F. Boero, G. Carrada, R. Cattaneo-Vietti, A. Cau, R. Chemello, S. Greco, A. Manganaro, G. N. di Sciara, G. F. Russo, and L. Tunesi. 2008. Italian marine reserve effectiveness: Does enforcement matter? Biological Conservation 141:699-709.	Yes	Biological Conservation	Conservation	Italy	Rocky reef communities strongly impacted by fishing may thus show extirpation or functional extinction of fish species that have important ecological roles (e.g. predators or herbivores), with consequences on ecosystem functioning and services (Holmund and Hammer, 1999; Worm et al., 2006)	Discussion	No	University of Salento	No	0	4.115
266	Multidisciplinary	3-5	2010	No	3	Male	Other	No	No	No	Yes	No	1	No	No	Yes	Guo, Z. W., L. Zhang, and Y. M. Li. 2010. Increased Dependence of Humans on Ecosystem Services and Biodiversity. Plos One 5.	Yes	PLoS One	Multidisciplinary	China	Furthermore, ecological experiments, observations, and theoretical developments show that ecosystem properties depend greatly on biodiversity in terms of the functional characteristics of organisms present in the ecosystem and the distribution and abundance of those organisms over space and time [18–21]. These results show that humans can yield more well-being from ecosystem services and biodiver…	Discussion	No	Chinese Academy of Science	No	0	4.092
267	Other	2-3	2008	No	3	Male	Europe	No	No	Yes	No	No	1	No	No	Yes	Guttormsen, A. G., D. Kristofersson, and E. Naevdal. 2008. Optimal management of renewable resources with Darwinian selection induced by harvesting. Journal of Environmental Economics and Management 56:167-179.	Yes	Journal of Environmental Economics and Management	Economics	Norway	In general, there has been widespread concern among scientists regarding harvesting pressure and the consequences that it has for biodiversity and ocean ecosystems [22,36]	Intro	No	Norwegian University of Life Sciences	No	0	2.169
268	Other	2-3	2008	No	3	Male	Canada	No	No	No	Yes	Yes	1	No	No	Yes	Haedrich, R. L., J. A. Devine, and V. J. Kendall. 2008. Predictors of species richness in the deep-benthic fauna of the northern Gulf of Mexico. Deep-Sea Research Part Ii-Topical Studies in Oceanography 55:2650-2656.	Yes	Deep-Sea Research Part II-Topical Studies in Oceanography	Oceanography	Canada	On the other hand, biodiversity itself reflects a number of valued ecosystem services (Worm et al., 2006)	Discussion	No	Memorial University	No	0	2.277
269	Other	0-2	2009	No	2	Male	USA	No	No	Yes	No	No	1	No	No	No	Hale, S. S. and J. W. Hollister. 2009. Beyond data management: how ecoinformatics can benefit environmental monitoring programs. Environmental Monitoring and Assessment 150:227-235.	Yes	Environmental Monitoring and Assessment	Other	USA	Synthetic databases compiled from many disparate data sources, for example […omitted…] Worm et al. (2006) on impacts of biodiversity loss, required a great deal of effort to find and integrate diverse data	Intro	No	U.S. Environmental Protection Agency	No	0	1.4
270	Other	3-5	2009	No	4	Male	Other	No	No	No	Yes	No	1	Yes	Yes	Yes	Hall, G. B., A. Moore, P. Knight, and N. Hankey. 2009. The extraction and utilization of local and scientific geospatial knowledge within the Bluff oyster fishery, New Zealand. Journal of Environmental Management 90:2055-2070.	Yes	Journal of Environmental Management	Other	New Zealand	Research published recently by Worm et al. (2006) on the effects of biodiversity loss on the world’s ocean ecosystem provides alarming evidence that world commercial fish stocks may entirely disappear by the mid-21st century (year 2048) unless measures are taken to increase ocean biodiversity. Their findings suggest that the elimination of locally adapted populations and species not only impairs …	Discussion	No	University of Otago	No	0	3.245
271	Biology	2-3	2010	No	4	Male	Other	No	Yes	Yes	No	No	1	No	No	No	Hall, S. J., P. Dugan, E. H. Allison, and N. L. Andrew. 2010. The End of the Line: Who is Most at Risk from the Crisis in Global Fisheries? Ambio 39:78-80.	Yes	Ambio	Biology	Malaysia	Drawing on several influential articles from the past few years (Pauly et al. 1998; Worm et al. 2006; Hilborn et al. 2005), Daniel Pauly, Boris Worm and Ray Hilborn very effectively translate the science behind the story into compelling mental images.	Intro	No	The Worldfish Center	No	0	2.025
272	Conservation	0-2	2009	Yes	3	Male	USA	No	Yes	Yes	No	No	1	No	Yes	No	Halpern, B. S., S. E. Lester, and J. B. Kellner. 2009. Spillover from marine reserves and the replenishment of fished stocks. Environmental Conservation 36:268-276.	Yes	Environmental Conservation	Conservation	USA	Overexploitation has resulted in dire predictions about the ability of oceans to continue supporting fisheries (Worm et al. 2006)	Intro	No	National Center for Ecological Analysis and Synthesis	Yes	1	1.927
273	Other	2-3	2010	No	2	Female	Other	Yes	Yes	Yes	No	No	1	No	Yes	No	Hamel, M. A. and S. Andrefouet. 2010. Using very high resolution remote sensing for the management of coral reef fisheries: Review and perspectives. Marine Pollution Bulletin 60:1397-1405.	Yes	Marine Pollution Bulletin	Other	New Caledonia	they [fisheries] increasingly appear under threat of collapse (Worm et al., 2006)	Intro	No	Institut de Recherche pour le Développement	No	0	2.503
274	Ecology	2-3	2010	No	2	Female	USA	Yes	Yes	Yes	No	No	1	No	Yes	No	Hammerschlag-Peyer, C. M. and C. A. Layman. 2010. Intrapopulation variation in habitat use by two abundant coastal fish species. Marine Ecology-Progress Series 415:211-220.	Yes	Marine Ecology-Progress Series	Ecology	USA	Overexploitation of marine fishes is considered one of the most critical global environmental crises (Jackson et al. 2001, Worm et al. 2006).	Intro	No	Florida International University	No	0	2.711
275	Other	>5	2008	No	1	Male	Europe	No	No	No	Yes	No	1	No	Yes	Yes	Hanski, I. 2008. The world that became ruined - Our cognitive incapacity to perceive large-scale and long-term changes is a major obstacle to rational environmental policies. Embo Reports 9:S34-S36.	Yes	Embo Reports	Other	Finland	A recent meta-analysis of small-scale experiments, long-term regional time series of ecological changes, and fisheries data indicated several adverse effects of biodiversity loss in marine ecosystems: a higher rate of resource collapses, a reduced potential to recover, a reduced numerical stability and reduced water quality owing to the loss of organisms, such as mussels, that filter water (Worm …	Discussion	No	University of Helsinki	No	0	7.355
276	Ecology	>5	2008	Yes	7	Male	Europe	Yes	Yes	Yes	No	No	1	No	No	Yes	Harborne, A. R., P. J. Mumby, C. V. Kappel, C. P. Dahlgren, F. Micheli, K. E. Holmes, and D. R. Brumbaugh. 2008. Tropical coastal habitats as surrogates of fish community structure, grazing, and fisheries value. Ecological Applications 18:1689-1701.	Yes	Ecological Applications	Ecology	United Kingdom	The protection of biodiversity, often through the use of protected areas, is a core aim of conservation (Margules and Pressey 2000, Lovejoy 2006) in order to maintain ecosystem functions, goods, and services (Solan et al. 2004, Worm et al. 2006)	Intro	No	University of Exeter	No	1	5.102
277	Fisheries	0-2	2012	No	8	Female	Canada	Yes	Yes	Yes	No	No	1	No	Yes	No	Harper, S., D. Bevacqua, R. Chudnow, S. Giorgi, V. Guillonneau, F. Le Manach, T. Sutor, and U. R. Sumaila. 2012. Fuelling the fisheries subsidy debate: Agreements, loopholes and implications. Fisheries Research 113:143-146.	Yes	Fisheries Research	Fisheries	Canada	The overexploitation of most of the world’s marine fish stocks has led to declines in both stocks and catches (FAO, 2010; Pauly et al., 2002; Worm et al., 2006, 2009)	Intro	No	University of British Columbia	No	0	1.586
278	Other	0-2	2007	No	1	Male	USA	No	No	No	Yes	No	1	No	Yes	No	Harris, W. S. 2007. International recommendations for consumption of long-chain omega-3 fatty acids. Journal of Cardiovascular Medicine 8:S50-S52.	Yes	Journal of Cardiovascular Medicine	Other	USA	Without proper management, many fish species may be no longer present in sufficient numbers in the future to make capture profitable [32]	Discussion	No	University of South Dakota	No	0	1.51
279	Other	3-5	2007	No	1	Male	USA	No	Yes	Yes	No	No	1	Yes	Yes	No	Harris, W. S. 2007. n-3 Fatty acid fortification: opportunities and obstacles. British Journal of Nutrition 97:593-595.	Yes	British Journal of Nutrition	Other	USA	According to a recent report, we are witnessing an ever accelerating loss of ocean biodiversity which could lead to ‘the global collapse of all taxa currently fished by the mid-21st century’(Worm et al. 2006)	Intro	No	University of South Dakota	No	0	3.013
280	Other	2-3	2007	No	6	Male	USA	No	No	Yes	No	No	1	No	No	No	Harris, W. S., M. A. DiRienzo, S. A. Sands, C. George, P. G. Jones, and A. K. Eapen. 2007. Stearidonic acid increases the red blood cell and heart eicosapentaenoic acid content in dogs. Lipids 42:325-333.	Yes	Lipids	Other	USA	As concerns grow about the long-term sustainability of fish as the sole source of omega-3 fatty acids [6]	Intro	No	Saint Lukes Hospital	No	0	2.129
281	Other	2-3	2008	No	10	Male	USA	No	No	Yes	Yes	No	2	No	Yes	No	Harris, W. S., S. L. Lemke, S. N. Hansen, D. A. Goldstein, M. A. DiRienzo, H. Su, M. A. Nemeth, M. L. Taylor, G. Ahmed, and C. George. 2008. Stearidonic acid-enriched soybean oil increased the omega-3 index, an emerging cardiovascular risk marker. Lipids 43:805-811.	Yes	Lipids	Other	USA	If such advice [to consume at least two servings of fish (preferably oily) per week] were actually heeded, there is serious doubt that the world’s oceans could support such a shift in dietary consumption patterns [10] // In addition, over-fishing is depleting stocks of some species [10], intensifying the need for new sources	Intro / Discussion	No	University of South Dakota	No	0	2.129
282	Other	3-5	2009	No	10	Male	USA	No	No	No	Yes	No	1	No	Yes	No	Harris, W. S., D. Mozaffarian, M. Lefevre, C. D. Toner, J. Colombo, S. C. Cunnane, J. M. Holden, D. M. Klurfeld, M. C. Morris, and J. Whelan. 2009. Towards Establishing Dietary Reference Intakes for Eicosapentaenoic and Docosahexaenoic Acids. Journal of Nutrition 139:804S-819S.	Yes	Journal of Nutrition	Other	USA	Serious concerns about overfishing and aquaculture practices have been raised (190) and must be considered	Discussion	No	University of South Dakota	No	0	3.916
283	Other	2-3	2008	No	2	Male	Europe	No	No	No	Yes	No	1	No	No	Yes	Hasler, H. and J. A. Ott. 2008. Diving down the reefs? Intensive diving tourism threatens the reefs of the northern Red Sea. Marine Pollution Bulletin 56:1788-1794.	Yes	Marine Pollution Bulletin	Other	Austria	Such a biodiversity loss would lead to […omitted…] and reduced ecosystem services (Hughes et al., 2003; Worm et al., 2006).	Discussion	No	University of Vienna	No	0	2.503
284	Other	0-2	2009	No	4	Male	Other	Yes	Yes	Yes	No	No	1	No	No	Yes	He, J. Z., Y. Ge, Z. H. Xu, and C. R. Chen. 2009. Linking soil bacterial diversity to ecosystem multifunctionality using backward-elimination boosted trees analysis. Journal of Soils and Sediments 9:547-554.	Yes	Journal of Soils and Sediments	Other	China	The increasing interest in the relationship between biodiversity and ecosystem functions stems from the perceptions that continuous loss of biodiversity, specially caused by human activity, can affect ecosystem functions and services (Loreau et al. 2001; Srivastava and Vellend 2005; Tilman et al. 1997; Worm et al. 2006)	Intro	No	Chinese Academy of Sciences	No	0	1.863
285	Other	2-3	2007	No	1	Male	USA	No	No	No	Yes	No	1	No	Yes	No	Heal, G. 2007. A Celebration of Environmental and Resource Economics. Review of Environmental Economics and Policy 1:7-25.	Yes	Review of Environmental Economics and Policy	Economics	USA	The statistics on the state of the world’s fisheries are intensely depressing. Sensible estimates suggest that the biomass of fish in the world’s oceans is today perhaps one tenth of what it was half a century ago, and is declining. [15]	Discussion	No	Columbia University	No	0	2.147
286	Multidisciplinary	>5	2008	No	2	Male	USA	Yes	Yes	No	Yes	No	3	No	Yes	No	Heal, G. and W. Schlenker. 2008. Economics - Sustainable fisheries. Nature 455:1044-1045.	Yes	Nature	Multidisciplinary	USA	The destruction of the world’s major fisheries has been widely documented, with a general consensus that the biomass of top marine predators is now some 10% of what it was half a century ago [1]// Costello and colleagues use the definition of collapse applied in an earlier paper by Worm et al. // Because both Costello et al. and Worm et al. define a fishery as collapsed when the catch drops below…	Discussion	No	Columbia Business School	No	0	36.28
287	Biology	2-3	2010	No	5	Male	USA	No	Yes	Yes	No	No	1	No	Yes	No	Hearn, A., J. Ketchum, A. P. Klimley, E. Espinoza, and C. Penaherrera. 2010. Hotspots within hotspots? Hammerhead shark movements around Wolf Island, Galapagos Marine Reserve. Marine Biology 157:1899-1915.	Yes	Marine Biology	Biology	USA	This concern, coupled with alarming signs of overfishing of commercial fish stocks (Pauly et al. 1998; Pauly and Watson 2003; Worm et al. 2006; Ovetz 2007)	Intro	No	University of California, Davis	No	0	2.276
288	Multidisciplinary	>5	2008	No	1	Male	Europe	No	No	No	Yes	No	1	No	No	Yes	Heath, M. R. 2008. Comment on "a global map of human impact on marine ecosystems". Science 321.	Yes	Science	Multidisciplinary	United Kingdom	Removal of mature fish affects the supply of juveniles elsewhere in the system, with consequences for species richness and diversity, marine predator populations, and food web functionality (9–11)	Discussion	No	Marine Laboratory	No	0	32.452
289	Biology	0-2	2008	No	3	Male	USA	No	No	No	Yes	Yes	1	No	No	No	Hebshi, A. J., D. C. Duffy, and K. D. Hyrenbach. 2008. Associations between seabirds and subsurface predators around Oahu, Hawaii. Aquatic Biology 4:89-98.	Yes	Aquatic Biology	Biology	USA	For this reason, we concur with the warning of other authors (e.g. University of Alaska Sea Grant College 1999, Yaffee 1999, Link 2002, Hinke et al. 2004, Worm et al. 2006) against the reliance on stock viability management as the sole driver of our fishery management policies	Discussion	No	University of Hawaii	No	0	1.474
290	Multidisciplinary	>5	2007	No	2	Male	Europe	Yes	Yes	Yes	No	No	2	No	No	Yes	Hector, A. and R. Bagchi. 2007. Biodiversity and ecosystem multifunctionality. Nature 448:188-U186.	Yes	Nature	Multidisciplinary	Switzerland	Individual ecosystem functions generally show a positive asymptotic relationship with increasing biodiversity, suggesting that some species are redundant [5–8] // Meta-analysis of the results of the first generation [5] of experimental research on biodiversity and ecosystem functioning has revealed that individual ecosystem processes generally show a positive but saturating relationship with incr…	Abstract / Intro	No	University of Zurich	No	0	36.28
291	Ecology	3-5	2007	No	23	Male	Europe	No	No	No	Yes	Yes	1	No	No	Yes	Hector, A., J. Joshi, M. Scherer-Lorenzen, B. Schmid, E. M. Spehn, L. Wacker, M. Weilenmann, E. Bazeley-White, C. Beierkuhnlein, M. C. Caldeira, P. G. Dimitrakopoulos, J. A. Finn, K. Huss-Danell, A. Jumpponen, P. W. Leadley, M. Loreau, C. P. H. Mulder, C. Nesshoover, C. Palmborg, D. J. Read, A. S. D. Siamantziouras, A. C. Terry, and A. Y. Troumbis. 2007. Biodiversity and ecosystem functioning: re…	Yes	Functional Ecology	Ecology	Switzerland	The results of biodiversity experiments like BIODEPTH have turned out to be highly repeatable and have established that changes in biodiversity (both richness and composition) do have the potential to impact many different ecosystem processes (Loreau et al. 2001; Hooper et al. 2005; Balvanera et al. 2006; Cardinale et al. 2006; Worm et al. 2006)	Discussion	No	University of Zurich	No	0	4.567
292	Ecology	2-3	2010	No	5	Male	Other	No	No	No	Yes	No	2	No	Yes	No	Hernandez, J. C., S. Clemente, D. Girard, A. Perez-Ruzafa, and A. Brito. 2010. Effect of temperature on settlement and postsettlement survival in a barrens-forming sea urchin. Marine Ecology-Progress Series 413:69-80.	Yes	Marine Ecology-Progress Series	Ecology	Canary Islands	combined with other human impacts such as overfishing of the urchins’ natural predators (Worm et al. 2006) // Overfishing of predators is another wordwide phenomenon with effects that are known to cascade over the entire ecosystem (Worm et al. 2006)	Discussion	No	Universidad de La Laguna	No	0	2.711
293	Other	0-2	2011	No	1	Male	USA	No	Yes	Yes	No	No	1	No	Yes	No	Heyman, W. D. 2011. Elements for Building a Participatory, Ecosystem-Based Marine Reserve Network. Professional Geographer 63:475-488.	Yes	Professional Geographer	Other	USA	Management systems have been devised for major industrial fisheries, yet the majority of the world’s fisheries and marine ecosystems have suffered from slow, misguided, ineffective, incomplete, or nonexistent management, resulting in synergistic “tragedy of the commons” (Hardin 1968; Jackson et al. 2001; Worm et al. 2006)	Intro	No	Texas A&M University	No	0	1.206
294	Other	0-2	2011	No	2	Male	USA	No	No	No	Yes	No	1	No	No	Yes	Heyman, W. D. and D. J. Wright. 2011. Marine Geomorphology in the Design of Marine Reserve Networks. Professional Geographer 63:429-442.	Yes	Professional Geographer	Other	USA	There is also a growing realization that a variety of additional factors are affecting the health, resilience, biodiversity, and productivity of marine waters and the ocean’s ability to produce the variety of ecosystem services on which societies depend (Worm et al. 2006)	Discussion	No	Texas A&M University	No	0	1.206
295	Conservation	0-2	2008	No	3	Male	Other	No	No	No	Yes	No	1	No	No	Yes	Higham, J. E. S., L. Bejder, and D. Lusseau. 2008. An integrated and adaptive management model to address the long-term sustainability of tourist interactions with cetaceans. Environmental Conservation 35:294-302.	Yes	Environmental Conservation	Conservation	New Zealand	The macro-level context is characterized by growing concerns for declining levels of global biodiversity and the increasing instability of complex ecosystems (Tilman 1999; Worm et al. 2006)	Discussion	No	University of Otago	No	0	1.927
297	Fisheries	2-3	2007	No	1	Male	USA	No	No	No	Yes	No	3	Yes	Yes	No	Hilborn, R. 2007. Moving to sustainability by learning from successful fisheries. Ambio 36:296-303.	Yes	Ambio	Fisheries	USA	Worm et al. (7) projected that all of the world’s wild fish stocks would be collapsed by 2048. These authors defined a stock to be collapsed if its catch in any year fell below 10% of the highest recorded catch and, using world catch statistics from 1950 largely compiled by the Food and Agriculture Organization (FAO), calculated the number of fish stocks that were collapsed in each year. In 2003 …	Discussion	No	University of Washington	No	0	2.025
298	Fisheries	3-5	2007	No	1	Male	USA	Yes	Yes	Yes	Yes	No	6	Yes	Yes	No	Hilborn, R. 2007. Reinterpreting the state of fisheries and their management. Ecosystems 10:1362-1369.	Yes	Ecosystems	Fisheries	USA	Since the 1990s, many papers have appeared in Science and Nature describing the decline of fisheries worldwide […omitted…] and projecting their total collapse (Worm and others 2006) // Worm and others (2006) defined ‘‘collapsed’’ as fish stocks with current catch that is less than 10% of the largest historical catch. Using this definition, they calculated the proportion of the world’s fisheries t…	Intro / Discussion	No	University of Washington	No	0	3.495
299	Policy	0-2	2008	No	1	Male	USA	No	No	No	Yes	No	1	No	No	No	Hildreth, R. G. 2008. Place-based ocean management: Emerging US law and practice. Ocean & Coastal Management 51:659-670.	Yes	Ocean & Coastal Management	Policy	USA	Of course implementing ecosystem-based approaches under the MSA, NMSA, or NMA depends very much on relevant scientific capabilities [216–223, 150, 119].	Conclusions	No	University of Oregon	No	0	1.333
300	Other	0-2	2011	No	2	Male	USA	No	No	No	Yes	No	1	No	No	Yes	Hill, J. and S. Mustafa. 2011. Natural Resources Management and Food Security in the Context of Sustainable Development. Sains Malaysiana 40:1331-1340.	Yes	Sains Malaysiana	Other	USA	Going beyond a general understanding that loss of biodiversity is affecting the ocean ecosystem functions, Worm et al. (2006) provided quantitative data to substantiate the link between biodiversity and ecosystem performance. According to their observations, rates of resource collapse increase whereas recovery potential, stability and water quality decrease with decline in diversity but restorati…	Discussion	No	La Trobe University	No	0	0.268
301	Other	2-3	2008	No	5	Male	Europe	No	Yes	Yes	No	No	1	No	Yes	No	Hill, J., M. Stellmes, T. Udelhoven, A. Roder, and S. Sommer. 2008. Mediterranean desertification and land degradation Mapping related land use change syndromes based on satellite observations. Global and Planetary Change 64:146-157.	Yes	Global and Planetary Change	Other	Germany	marine ecosystems are at the brink of collapse due to heavy exploitation (Worm et al., 2006)	Intro	No	University of Trier	No	0	2.93
302	Ecology	3-5	2010	No	2	Male	Europe	No	No	Yes	No	No	1	No	No	No	Hillebrand, H. and B. J. Cardinale. 2010. A critique for meta-analyses and the productivity-diversity relationship. Ecology 91:2545-2549.	Yes	Ecology	Ecology	Germany	There is no substitute for thoroughly understanding the natural history of the system(s) from which one is drawing inference, and no substitute for characterizing the unique and shared features of the studies included in a synthesis (for example, see Foster et al. 2006’s response to Halpern et al.’s 2006 meta-analysis, or the comments on Worm et al. 2006, including those by Holker et al. 2007, Ja…	Intro	No	Carl-von-Ossietzky University Oldenburg	No	0	4.849
303	Ecology	>5	2009	No	2	Male	Europe	No	No	Yes	No	No	1	No	No	Yes	Hillebrand, H. and B. Matthiessen. 2009. Biodiversity in a complex world: consolidation and progress in functional biodiversity research. Ecology Letters 12:1405-1419.	Yes	Ecology Letters	Ecology	Germany	Recent years have seen a phase of synthesis in BDEF [biodiversity effects on ecosystem functions] research, marked by a series of reviews and meta-analyses (Hooper et al. 2005; Balvanera et al. 2006; Cardinale et al. 2006a, 2007; Worm et al. 2006; Stachowicz et al. 2007)	Intro	No	Carl-von-Ossietzky University Oldenburg	No	0	17.557
304	Ecology	0-2	2011	No	1	Male	Other	No	No	Yes	Yes	No	2	No	No	No	Hobday, A. J. 2011. Sliding baselines and shuffling species: implications of climate change for marine conservation. Marine Ecology-an Evolutionary Perspective 32:392-403.	Yes	Marine Ecology-an Evolutionary Perspective	Ecology	Australia	and to support the establishment of marine protected areas (Jackson 2001; Pitcher 2001; Worm et al. 2006) // Reduction of threats other than climate change is still important, and protected areas have been shown to have positive conservation outcomes in many situations (e.g. Worm et al. 2006)	Intro / Discussion	No	CSIRO Marine and Atmospheric Research	No	0	1.836
305	Multidisciplinary	>5	2011	No	2	Male	Canada	Yes	Yes	Yes	No	No	1	No	Yes	Yes	Hocking, M. D. and J. D. Reynolds. 2011. Impacts of Salmon on Riparian Plant Diversity. Science 331:1609-1612.	Yes	Science	Multidisciplinary	Canada	Declines in fish biomass through overexploitation, habitat degradation, and climate change have important consequences for the structure and functioning of marine ecosystems (1)	Intro	No	Simon Fraser University	No	0	32.452
306	Ecology	0-2	2009	No	2	Female	USA	Yes	Yes	Yes	No	No	4	Yes	Yes	Yes	Hoehn, S. and B. Thapa. 2009. Attitudes and perceptions of indigenous fishermen towards marine resource management in Kuna Yala, Panama. International Journal of Sustainable Development and World Ecology 16:427-437.	Yes	International Journal of Sustainable Development and World Ecology	Ecology	USA	Marine ecosystems are of great importance to human wellbeing in their provision of services such as food resources, waste detoxification or flood control (Worm et al. 2006). // However, human activities cause rapid decline of marine ecosystems through overfishing, pollution and habitat destruction, especially in sensitive coastal ecosystems, whereby coral reefs are at high risk of permanent damag…	Intro	No	University of Florida	No	0	0.965
307	Conservation	3-5	2009	No	3	Female	USA	No	No	No	Yes	No	1	No	No	No	Holdredge, C., M. D. Bertness, and A. H. Altieri. 2009. Role of Crab Herbivory in Die-Off of New England Salt Marshes. Conservation Biology 23:672-679.	Yes	Conservation Biology	Conservation	USA	The consequences of the loss of secondary consumers from coastal ecosystems are just beginning to be understood (Jackson et al. 2001; Worm et al. 2006)	Discussion	No	Brown University	No	0	4.692
308	Multidisciplinary	>5	2008	No	1	Male	USA	No	No	No	Yes	No	1	No	Yes	No	Holdren, J. P. 2008. Presidential address - Science and technology for sustainable well-being. Science 319:424-434.	Yes	Science	Multidisciplinary	USA	The real magnitude of the human impact, however, is revealed only by looking region by region and species by species at the fish and shellfish stocks on which the catch had depended; it is a picture of devastating decline, brought about not only by unsustainable harvest of target species but also by the extensive bycatch and bottom-habitat destruction brought about by widely used if reprehensible…	Discussion	No	Harvard University	No	0	32.452
309	Multidisciplinary	>5	2007	No	7	Male	Europe	Yes	Yes	Yes	Yes	Yes	7	Yes	Yes	Yes	Holker, F., D. Beare, H. Dorner, A. di Natale, H. J. Ratz, A. Temming, and J. Casey. 2007. Comment on "Impacts of biodiversity loss on ocean ecosystem services". Science 316:1285-1285.	Yes	Science	Multidisciplinary	Italy	Worm et al. (2006) investigated the importance of biodiversity to marine ecosystem services across temporal and spatial scales. In projecting the extent of future fisheries collapse // The Worm et al. study (1) represents a useful contribution to the discussion of human exploitation of the oceans and the relation between biodiversity and ecosystem services. The conclusion is that high biodiversit…	Abstract / Discussion	No	Euopean Commission	No	0	32.452
310	Policy	0-2	2012	No	4	Female	Europe	No	Yes	Yes	No	No	1	No	Yes	No	Hornborg, S., P. Nilsson, D. Valentinsson, and F. Ziegler. 2012. Integrated environmental assessment of fisheries management: Swedish Nephrops trawl fisheries evaluated using a life cycle approach. Marine Policy 36:1193-1201.	Yes	Marine Policy	Policy	Sweden	Several of current fishing regimes have been found to have severe negative impacts, not only on targeted species, but also on whole marine ecosystems, and are accordingly being questioned [2,3]	Intro	No	Swedish Institute for Food and Biotechnology	No	0	1.865
311	Ecology	0-2	2012	No	5	Male	Other	No	Yes	Yes	No	No	1	No	No	No	Hossain, M. Y., J. Ohtomi, A. Jaman, S. Jasmine, and R. L. Vadas. 2012. Life history traits of the Monsoon River prawn Macrobrachium malcolmsonii (Milne-Edwards, 1844) (Palaemonidae) in the Ganges (Padma) River, northwestern Bangladesh. Journal of Freshwater Ecology 27:131-142.	Yes	Journal of Freshwater Ecology	Ecology	Japan	avoidance of harvesting methods that destroy their benthic (Worm et al. 2006) habitats	Intro	No	Kagoshima University	No	0	0.435
312	Multidisciplinary	3-5	2012	No	4	Female	Other	Yes	Yes	Yes	No	No	2	No	No	Yes	Hovey, R. K., K. P. Van Niel, L. M. Bellchambers, and M. B. Pember. 2012. Modelling Deep Water Habitats to Develop a Spatially Explicit, Fine Scale Understanding of the Distribution of the Western Rock Lobster, Panulirus cygnus. Plos One 7.	Yes	PLoS One	Multidisciplinary	Australia	Marine ecosystems worldwide are under increasing pressure due to anthropogenic impacts such as coastal development, pollution and overfishing [1–5]. // Previous studies have suggested that the impacts of these pressures are being reflected in a decline in biodiversity, outbreaks of marine pests and declining habitat quality [3–5]	Intro	No	University of Western Australia	No	0	4.092
313	Conservation	0-2	2009	No	2	Unknown	Canada	Yes	Yes	Yes	No	No	1	No	No	No	Hu, L. M. and J. S. Wroblewski. 2009. Conserving a subpopulation of the northern Atlantic cod metapopulation with a marine protected area. Aquatic Conservation-Marine and Freshwater Ecosystems 19:178-193.	Yes	Aquatic Conservation-Marine and Freshwater Ecosystems	Conservation	Canada	underscored the need for conserving living marine resources and the biodiversity of fish populations (Myers and Worm, 2003; Worm et al., 2006).	Intro	No	Memorial University	No	0	1.929
314	Policy	0-2	2011	No	1	Female	Other	No	Yes	Yes	No	No	1	No	No	No	Huang, H. W. 2011. Bycatch of high sea longline fisheries and measures taken by Taiwan: Actions and challenges. Marine Policy 35:712-720.	Yes	Marine Policy	Policy	Taiwan	Commercial fish harvest is often accompanied by the incidental catch or killing of non-commercial species, known as bycatch [1,2]. Such non-commercial species include marine mammals, sharks, seabirds, sea turtles and other ecologically related species [3–7]	Intro	No	National Taiwan Ocean University	No	0	1.865
315	Multidisciplinary	3-5	2012	No	9	Male	Europe	No	Yes	Yes	No	No	2	No	No	Yes	Hubert, N., C. P. Meyer, H. J. Bruggemann, F. Guerin, R. J. L. Komeno, B. Espiau, R. Causse, J. T. Williams, and S. Planes. 2012. Cryptic Diversity in Indo-Pacific Coral-Reef Fishes Revealed by DNA-Barcoding Provides New Support to the Centre-of-Overlap Hypothesis. Plos One 7.	Yes	PLoS One	Multidisciplinary	France	Globally, the modern decline of biodiversity calls for a better understanding of the processes regulating diversity and the consequences of species loss for ecosystem functioning [3–8] // Although fifty-eight percent of the world’s reefs are reported to be threatened by human activities that affect ecosystem services [2,8]	Intro	No	Universite´ de La Re´union	No	0	4.092
316	Other	0-2	2009	No	2	Male	Canada	No	No	Yes	No	No	1	No	Yes	No	Hutchings, J. A. and M. Festa-Bianchet. 2009. Scientific advice on species at risk: a comparative analysis of status assessments of polar bear, Ursus maritimus. Environmental Reviews 17:45-51.	Yes	Environmental Reviews	Other	Canada	The marginalization of science associated with such policies has resulted in massive overfishing and historically unprecedented depletions of commercially exploited fishes in Canada and around the world (Hutchings 2000; Myers and Worm 2003; Hutchings and Reynolds 2004; Worm et al. 2006).	Intro	No	Dalhousie University	No	0	1.703
317	Biology	0-2	2011	No	2	Male	Canada	No	No	No	Yes	No	1	No	No	Yes	Hutchings, J. A. and R. W. Rangeley. 2011. Correlates of recovery for Canadian Atlantic cod (Gadus morhua). Canadian Journal of Zoology-Revue Canadienne De Zoologie 89:386-400.	Yes	Canadian Journal of Zoology-Revue Canadienne De Zoologie	Biology	Canada	These benefits [of marine protected areas] appear to be robust for […omitted…] the restoration of biodiversity and the ecosystem services that accrue (Worm et al. 2006, 2009).	Discussion	No	Dalhousie University	No	0	1.205
318	Other	3-5	2007	No	2	Male	USA	No	No	No	Yes	No	1	Yes	Yes	No	Hyde, J. R. and R. D. Vetter. 2007. The origin, evolution, and diversification of rockfishes of the genus Sebastes (Cuvier). Molecular Phylogenetics and Evolution 44:790-811.	Yes	Molecular Phylogenetics and Evolution	Other	USA	Recent studies project dire consequences for world fisheries within the next 40–50 years unless current trends of exploitation are changed (e.g., Worm et al., 2006).	Discussion	No	Scripps Institution of Oceanography	No	0	3.609
319	Other	0-2	2009	No	10	Female	Europe	No	Yes	Yes	No	No	1	No	No	No	Hyytiainen, K., H. Ahtiainen, J. Heikkila, J. Helin, A. Huhtala, A. Iho, K. Koikkalainen, A. Miettinen, E. Pouta, and J. Vesterinen. 2009. An integrated simulation model to evaluate national measures for the abatement of agricultural nutrients in the Baltic Sea. Agricultural and Food Science 18:440-459.	Yes	Agricultural and Food Science	Other	Finland	This causes economic losses, […omitted…] biodiversity is lost (Beaumont et al. 2007, Worm et al. 2006)	Intro	No	MTT Economic Research	No	0	0.923
320	Conservation	0-2	2010	No	3	Male	Europe	Yes	Yes	Yes	No	No	1	No	Yes	No	Iglesias, S. P., L. Toulhoat, and D. Y. Sellos. 2010. Taxonomic confusion and market mislabelling of threatened skates: important consequences for their conservation status. Aquatic Conservation-Marine and Freshwater Ecosystems 20:319-333.	Yes	Aquatic Conservation-Marine and Freshwater Ecosystems	Conservation	France	Marine biodiversity is suffering from accelerating loss of populations and species by overfishing (Pauly et al., 2002; Worm et al., 2006).	Intro	No	Muse´um national d’Histoire naturelle	No	0	1.929
321	Multidisciplinary	3-5	2010	No	18	Female	USA	No	Yes	Yes	No	No	1	No	No	No	Iken, K., B. Konar, L. Benedetti-Cecchi, J. J. Cruz-Motta, A. Knowlton, G. Pohle, A. Mead, P. Miloslavich, M. Wong, T. Trott, N. Mieszkowska, R. Riosmena-Rodriguez, L. Airoldi, E. Kimani, Y. Shirayama, S. Fraschetti, M. Ortiz-Touzet, and A. Silva. 2010. Large-Scale Spatial Distribution Patterns of Echinoderms in Nearshore Rocky Habitats. Plos One 5.	Yes	PLoS One	Multidisciplinary	USA	They [biodiversity assessments] are important for understanding ecological patterns and ecosystem functioning and for managing marine resource use and identifying conservation priorities [1–3]	Intro	No	University of Alaska Fairbanks	No	0	4.092
322	Other	0-2	2008	No	2	Male	Europe	No	No	No	Yes	No	1	No	No	No	Ilan, K. and J. C. Gaillard. 2008. Placing Climate Change within Disaster Risk Reduction. Disaster Advances 1:3-5.	Yes	Disaster Advances	Other	Norway	Interest and work in disasters long preceded interest in contemporary climate change [8,15,20]	Discussion	No	CICERO	No	0	0.692
323	Ecology	3-5	2011	No	2	Male	USA	No	Yes	Yes	No	No	1	No	No	Yes	Isbell, F. I. and B. J. Wilsey. 2011. Increasing native, but not exotic, biodiversity increases aboveground productivity in ungrazed and intensely grazed grasslands. Oecologia 165:771-781.	Yes	Oecologia	Ecology	USA	Previous studies have found that increasing biodiversity can increase biomass production and nutrient uptake in both terrestrial and aquatic ecosystems (reviewed by Hooper et al. 2005; Balvanera et al. 2006; Cardinale et al. 2006; Worm et al. 2006).	Intro	No	Iowa State University	No	0	3.412
324	Ecology	0-2	2007	Yes	1	Male	USA	No	No	No	Yes	Yes	1	No	No	Yes	Jackson, J. B. C. 2007. Economic incentives, social norms, and the crisis of fisheries. Ecological Research 22:16-18.	Yes	Ecological Research	Ecology	USA	Neither Levin nor Vincent make any mention of the conservation of biodiversity per se or the potential importance of biodiversity to ecosystem services (Daily 1997, Tilman et al. 1997, Worm et al. 2006)	Conclusions	No	Scripps Institution of Oceanography	Yes	1	1.565
325	Ecology	>5	2008	Yes	1	Male	USA	No	No	Yes	No	No	1	No	No	Yes	Jackson, J. B. C. 2008. Ecological extinction and evolution in the brave new ocean. Proceedings of the National Academy of Sciences of the United States of America 105:11458-11465.	Yes	Proceedings of the National Academy of Sciences of the United States of America	Ecology	USA	Trophic structure and biodiversity are also key components of the resistance and resilience of marine ecosystems to future perturbations (13, 14)	Intro	No	Scripps Institution of Oceanography	Yes	1	9.681
326	Other	0-2	2010	Yes	9	Female	Canada	No	Yes	Yes	Yes	No	2	No	Yes	No	Jacquet, J., J. Hocevar, S. Lai, P. Majluf, N. Pelletier, T. Pitcher, E. Sala, R. Sumaila, and D. Pauly. 2010. Conserving wild fish in a sea of market-based efforts. Oryx 44:45-56.	Yes	Oryx	Other	Canada	Future projections show that seafood supply from capture fisheries is decreasing and that, overall, today’s marine fisheries are unsustainable (Pauly et al., 2002; Worm et al., 2006). // After more than a decade of market-based sustainable seafood initiatives the demand for this last wild food source is higher than ever and has resulted in further declines of fish populations (Pauly et al., 2002;…	Intro / Discussion	No	University of British Columbia	No	1	1.826
327	Policy	0-2	2008	No	2	Female	Canada	No	Yes	Yes	No	No	1	No	Yes	No	Jacquet, J. L. and D. Pauly. 2008. Trade secrets: Renaming and mislabeling of seafood. Marine Policy 32:309-318.	Yes	Marine Policy	Policy	Canada	In the years that followed, more fish stocks collapsed around the world [2]	Intro	No	University of British Columbia	No	0	1.865
328	Multidisciplinary	>5	2007	No	1	Male	USA	Yes	Yes	Yes	Yes	Yes	4	Yes	Yes	No	Jaenike, J. 2007. Comment on "Impacts of biodiversity loss on ocean ecosystem services". Science 316.	Yes	Science	Multidisciplinary	USA	Worm et al. (2006) used a power relation to predict a global collapse of fisheries by the year 2048. // In their recent paper, Worm et al. (1) predicted “the global collapse of all taxa currently fished by the mid–21st century (based on the extrapolation of regression in Fig. 3A to 100% in the year 2048),” a date that has since received considerable media attention. // However, examination of the…	Abstract / Discussion	No	University of Rochester	No	0	32.452
329	Fisheries	2-3	2008	No	2	Female	USA	No	No	No	Yes	No	1	No	No	Yes	Jarvis, E. T. and C. G. Lowe. 2008. The effects of barotrauma on the catch-and-release survival of southern California nearshore and shelf rockfish (Scorpaenidae, Sebastes spp.). Canadian Journal of Fisheries and Aquatic Sciences 65:1286-1296.	Yes	Canadian Journal of Fisheries and Aquatic Sciences	Fisheries	USA	The practice of using assisted release in the recreational rockfish fishery may help restore rockfish diversity on rocky reefs that have suffered decades of intense fishing pressure, which in turn would help to increase ecosystem function and resilience to fishery collapse (Worm et al. 2006).	Discussion	No	California State University	No	0	2.213
330	Other	>5	2009	No	6	Male	Canada	No	No	Yes	Yes	No	3	No	Yes	No	Jenkins, D. J. A., J. L. Sievenpiper, D. Pauly, U. R. Sumaila, C. W. C. Kendall, and F. M. Mowat. 2009. Are dietary recommendations for the use of fish oils sustainable? Canadian Medical Association Journal 180:633-637.	Yes	Canadian Medical Association Journal	Other	Canada	The main problem with this advice is that, even at current levels of fish consumption, fisheries globally have reached a state of severe crisis (Figure 1). [5–8] // Exploited stocks (n < 10 000; in 64 large marine ecosystems) whose catches declined to 10% of their historic maximum yield, signifying collapse. [8,47,48] // and the number of collapsed stocks has been increasing exponentially since 1…	Intro / Discussion	No	St Michael's Hospital	No	0	8.217
331	Other	3-5	2009	No	2	Male	Europe	No	Yes	Yes	No	No	2	No	No	Yes	Jennerjahn, T. C. and E. Yuwono. 2009. Segara Anakan, Java, Indonesia, a mangrove-fringed coastal lagoon affected by human activities. Regional Environmental Change 9:231-233.	Yes	Regional Environmental Change	Other	Germany	Since then an accelerating loss of biodiversity is accompanied by an overall decrease of water quality, recovery potential and stability of marine and coastal ecosystems (Worm et al. 2006). // Biodiversity conservation and long-term economic development can be seen as interdependent societal goals of equal importance (Worm et al. 2006).	Intro	No	Leibniz Center for Tropical Marine Ecology	No	0	3
332	Ecology	0-2	2012	No	3	Male	USA	No	No	No	Yes	No	3	Yes	Yes	Yes	Jensen, O. P., T. A. Branch, and R. Hilborn. 2012. Marine fisheries as ecological experiments. Theoretical Ecology 5:3-22.	Yes	Theoretical Ecology	Ecology	USA	Worm et al. (2006) examined 12 coastal ecosystems in Europe, North America and Australia, finding that increasing species richness was associated with lower percentages of collapsed fish and invertebrate stocks. // They found similar patterns in catch data from large marine ecosystems: more diverse ecosystems had higher rates of recovery for depleted species and lower interannual variability in c…	Discussion	No	Rutgers University	No	0	1.545
333	Other	0-2	2007	No	3	Male	Europe	No	No	No	Yes	No	1	No	No	Yes	Jentoft, S., T. C. van Son, and M. Bjorkan. 2007. Marine protected areas: A governance system analysis. Human Ecology 35:611-622.	Yes	Human Ecology	Anthropology	Norway	Thus, maintaining a healthy ecosystem will enhance its degree of resilience (Folke et al. 2004; Hughes et al. 2005; Worm et al. 2006)	Discussion	No	University of Tromsø	No	0	1.629
334	Ecology	>5	2011	No	22	Female	Europe	No	No	Yes	No	No	1	No	No	Yes	Jentsch, A., J. Kreyling, M. Elmer, E. Gellesch, B. Glaser, K. Grant, R. Hein, M. Lara, H. Mirzae, S. E. Nadler, L. Nagy, D. Otieno, K. Pritsch, U. Rascher, M. Schadler, M. Schloter, B. K. Singh, J. Stadler, J. Walter, C. Wellstein, J. Wollecke, and C. Beierkuhnlein. 2011. Climate extremes initiate ecosystem-regulating functions while maintaining productivity. Journal of Ecology 99:689-702.	Yes	Journal of Ecology	Ecology	Germany	First, the role of biodiversity in ensuring the performance of ecosystem functioning (Balvanera et al. 2006; Worm et al. 2006; Hector & Bagchi 2007; Suttle, Thomsen & Power 2007)	Intro	No	University of Bayreuth	No	0	5.044
335	Conservation	0-2	2008	No	7	Female	Other	Yes	Yes	Yes	No	No	1	No	No	No	Jiang, H., H. Q. Cheng, W. Le Quesne, H. G. Xu, J. Wu, H. Ding, and F. Arreguin-Sanchez. 2008. Ecosystem model predictions of fishery and conservation trade-offs resulting from marine protected areas in the East China Sea. Environmental Conservation 35:137-146.	Yes	Environmental Conservation	Conservation	China	Marine protected areas (MPAs), in which exploitative activities such as fishing are partly or wholly prohibited, have garnered much attention recently among researchers and marine advocacy groups as a tool for fishery management, protecting biodiversity and ecosystem structure, or preserving unique marine ecosystems (Bohnsack 1998; Hastings & Botsford 1999; Harmelin 2000; Beattie et al. 2002; Bly…	Intro	No	East China Normal University	No	0	1.927
336	Other	>5	2008	No	7	Female	USA	No	Yes	Yes	No	No	1	No	No	No	Jiang, H., R. Zirkle, J. G. Metz, L. Braun, L. Richter, S. G. Van Lanen, and B. Shen. 2008. The role of tandem acyl carrier protein domains in polyunsaturated fatty acid biosynthesis. Journal of the American Chemical Society 130:6336-+.	Yes	Journal of the American Chemical Society	Other	USA	In addition, this natural source of PUFAs [polyunsaturated fatty acids] has been endangered due to ocean pollution and overfishing. [2b]	Intro	No	University of Wisconsin	No	0	9.907
337	Ecology	2-3	2009	No	3	Female	Other	No	No	No	Yes	No	1	No	No	Yes	Jiang, Y. Z., J. H. Cheng, and S. F. Li. 2009. Temporal changes in the fish community resulting from a summer fishing moratorium in the northern East China Sea. Marine Ecology-Progress Series 387:265-273.	Yes	Marine Ecology-Progress Series	Ecology	China	Since there is a positive relationship between diversity and ecosystem functions and structures (Worm et al. 2006)	Discussion	No	Chinese Academy of Fisheries Science	No	0	2.711
338	Fisheries	0-2	2010	No	2	Female	Other	No	No	No	Yes	No	1	No	No	Yes	Johnson, J. E. and D. J. Welch. 2010. Marine Fisheries Management in a Changing Climate: A Review of Vulnerability and Future Options. Reviews in Fisheries Science 18:106-124.	Yes	Reviews in Fisheries Science	Fisheries	Australia	Diversifying to multispecies fisheries will make them more resilient to environmental change and future uncertainty than highly specialized fisheries (Worm et al., 2006; Worldfish, 2007).	Discussion	No	C2O–coasts climate oceans	No	0	1.946
340	Policy	0-2	2009	No	2	Female	Europe	Yes	Yes	Yes	No	No	1	No	Yes	No	Joyce, A. and R. Canessa. 2009. Spatial and Temporal Changes in Access Rights to Shellfish Resources in British Columbia. Coastal Management 37:585-616.	Yes	Coastal Management	Policy	Norway	Global demand for seafood products is growing exponentially, yet the productivity of wild fisheries is declining rapidly due to overfishing and other anthropogenic stresses on the marine environment (Pauly et al., 2001; Worm et al., 2006)	Intro	No	Norwegian University of Life Sciences	No	0	1.194
341	Other	0-2	2010	No	2	Female	Europe	Yes	Yes	Yes	No	No	1	No	No	No	Joyce, A. L. and T. A. Satterfield. 2010. Shellfish aquaculture and First Nations' sovereignty: The quest for sustainable development in contested sea space. Natural Resources Forum 34:106-123.	Yes	Natural Resources Forum	Other	Sweden	Global demand for seafood is growing exponentially, yet more than 75% of the world’s wild fisheries are exploited at or beyond capacity (Worm et al., 2006)	Intro	No	Norwegian University of Life Sciences	No	0	0.667
342	Multidisciplinary	>5	2011	No	5	Female	Europe	No	Yes	Yes	No	No	1	No	No	No	Juan-Jorda, M. J., I. Mosqueira, A. B. Cooper, J. Freire, and N. K. Dulvy. 2011. Global population trajectories of tunas and their relatives. Proceedings of the National Academy of Sciences of the United States of America 108:20650-20655.	Yes	Proceedings of the National Academy of Sciences of the United States of America	Multidisciplinary	Spain	Fifty or more years later, the global impact of fishing on pelagic fishes and their ecosystems is only now beginning to be understood (3, 4).	Intro	No	Universidad de A Coruña	No	0	9.681
343	Other	0-2	2011	No	2	Male	USA	No	Yes	Yes	No	No	1	No	Yes	No	Kaffine, D. T. and C. Costello. 2011. Unitization of Spatially Connected Renewable Resources. B E Journal of Economic Analysis & Policy 11.	Yes	B E Journal of Economic Analysis & Policy	Economics	USA	The collapse of many of the world’s fisheries (Worm et al., 2006, Myers and Worm, 2003, Jackson et al., 2001)	Intro	No	Colorado School of Mines	No	0	0.55
344	Fisheries	0-2	2008	No	2	Male	USA	No	Yes	Yes	No	No	1	No	No	No	Kaimmer, S. and A. W. Stoner. 2008. Field investigation of rare-earth metal as a deterrent to spiny dogfish in the Pacific halibut fishery. Fisheries Research 94:43-47.	Yes	Fisheries Research	Fisheries	USA	Also, the reduction of elasmobranch populations through discard mortality may be responsible for undesirable shifts in ecological organization (Worm et al., 2006; Myers et al., 2007)	Intro	No	International Pacific Halibut Commission	No	0	1.586
345	Multidisciplinary	>5	2007	No	4	Male	USA	No	No	No	Yes	No	1	No	No	Yes	Kareiva, P., S. Watts, R. McDonald, and T. Boucher. 2007. Domesticated nature: Shaping landscapes and ecosystems for human welfare. Science 316:1866-1869.	Yes	Science	Multidisciplinary	USA	More generally, the simplification and alteration of marine ecosystems by human use repeatedly reduces the stability of food production and the resilience of these ecosystems to disturbances (18)	Discussion	No	The Nature Conservancy	No	0	32.452
346	Fisheries	2-3	2008	No	2	Male	Europe	No	Yes	Yes	No	No	1	No	Yes	No	Keyl, F. and M. Wolff. 2008. Environmental variability and fisheries: what can models do? Reviews in Fish Biology and Fisheries 18:273-299.	Yes	Reviews in Fish Biology and Fisheries	Fisheries	Germany	For the near future for all stocks overexploitation is predicted (e.g., Pauly 2006; Worm et al. 2006)	Intro	No	Center for Tropical Marine Ecology	No	0	2.5
347	Policy	0-2	2009	No	1	Female	Europe	No	Yes	Yes	No	No	1	Yes	Yes	No	Keyuan, Z. 2009. Regulation of waste dumping at sea: The Chinese practice. Ocean & Coastal Management 52:383-389.	Yes	Ocean & Coastal Management	Policy	United Kingdom	According to a recent report published in Science, many fish species would be extinct by around 2050 [1]	Intro	No	University of Central Lancashire	No	0	1.333
348	Other	3-5	2010	No	2	Male	Canada	No	Yes	Yes	Yes	No	3	No	Yes	Yes	Khan, A. S. and B. Neis. 2010. The rebuilding imperative in fisheries: Clumsy solutions for a wicked problem? Progress in Oceanography 87:347-356.	Yes	Progress in Oceanography	Oceanography	Canada	There is growing concern that in the absence of major interventions, most commercial fish stocks could collapse beyond sustainable levels (Worm et al., 2006) // Moreover, loss of marine biodiversity has been shown to affect the provision of ecosystem goods and services (Worm et al., 2006). // there is little point in struggling to reverse the degradation of the world’s fisheries. This perspective…	Intro / Discussion	No	Memorial University	No	0	3.142
349	Ecology	3-5	2009	No	7	Male	USA	No	No	No	Yes	Yes	1	No	No	Yes	Kimbro, D. L., E. D. Grosholz, A. J. Baukus, N. J. Nesbitt, N. M. Travis, S. Attoe, and C. Coleman-Hulbert. 2009. Invasive species cause large-scale loss of native California oyster habitat by disrupting trophic cascades. Oecologia 160:563-575.	Yes	Oecologia	Ecology	USA	Thus, echoing the conclusions of previous work on trophic cascades (Myers et al. 2007), biological invasions (Parker et al. 2006), and biodiversity–ecosystem function (Jackson et al. 2001; Worm et al. 2006), our results suggest that marine food webs can be conserved by protecting native top predators that simultaneously regulate the foraging of native intermediate consumers (via density- and trai…	Discussion	No	University of California, Davis	No	0	3.412
350	Other	3-5	2009	No	3	Male	Europe	Yes	Yes	Yes	No	No	2	No	No	Yes	Kirby, R. R., G. Beaugrand, and J. A. Lindley. 2009. Synergistic Effects of Climate and Fishing in a Marine Ecosystem. Ecosystems 12:548-561.	Yes	Ecosystems	Other	United Kingdom	Marine ecosystems are at the forefront of current conservation concerns due to the separate effects of overfishing and climate change on their biocomplexity and productivity (Worm and others 2006; Brander 2007) // When these abiotic and biotic factors alter in aquatic systems there are consequences for [...omitted...] and consequently for ecosystem services (Worm and others 2006; Brander 2007)	Intro	No	University of Plymouth	No	0	3.495
351	Other	2-3	2008	No	9	Male	USA	No	No	No	Yes	No	1	No	No	Yes	Kite-Powell, H. L., L. E. Fleming, L. C. Backer, E. M. Faustman, P. Hoagland, A. Tsuchiya, L. R. Younglove, B. A. Wilcox, and R. J. Gast. 2008. Linking the oceans to public health: current efforts and future directions. Environmental Health 7.	Yes	Environmental Health	Other	USA	The effects of ecological degradation on a regional scale have been documented in terms of losses in native species diversity and reduced ecosystem processes and services [75]	Discussion	No	Woods Hole Oceanographic Institution	No	0	2.649
352	Other	0-2	2009	No	6	Male	Other	No	Yes	Yes	No	No	1	Yes	Yes	No	Kitessa, S. M., A. Williams, S. Gulati, V. Boghossian, J. Reynolds, and K. L. Pearce. 2009. Influence of duration of supplementation with ruminally protected linseed oil on the fatty acid composition of feedlot lambs. Animal Feed Science and Technology 151:228-239.	Yes	Animal Feed Science and Technology	Other	Australia	It is predicted that the world’s stocks of seafood will collapse by 2050 at present rates of destruction by fishing (Worm et al., 2006a,b)	Intro	No	CSIRO Livestock Industries	No	0	1.691
353	Other	3-5	2009	No	2	Male	Other	No	No	Yes	No	No	2	Yes	Yes	No	Kitessa, S. M. and P. Young. 2009. Echium oil is better than rapeseed oil in enriching poultry meat with n-3 polyunsaturated fatty acids, including eicosapentaenoic acid and docosapentaenoic acid. British Journal of Nutrition 101:709-715.	Yes	British Journal of Nutrition	Other	Australia	Worm et al. (14) predicted that seafood resources would face total collapse mid this century // Fatty acid methyl esters were prepared by published methods (14)	Intro / Methods	Yes	CSIRO Livestock Industries	No	0	3.013
354	Other	0-2	2011	No	2	Male	Other	No	Yes	Yes	No	No	1	No	No	No	Kitessa, S. M. and P. Young. 2011. Enriching milk fat with n-3 polyunsaturated fatty acids by supplementing grazing dairy cows with ruminally protected Echium oil. Animal Feed Science and Technology 170:35-44.	Yes	Animal Feed Science and Technology	Other	Australia	It has been recognised for some time now that this continuing increased consumer demand for LC n−3 PUFA may not be matched by the diminishing supply of wild catch fish due to the deterioration of the marine ecosystems (Worm et al., 2006a,b)	Intro	No	CSIRO Livestock Industries	No	0	1.691
355	Policy	0-2	2010	No	2	Male	USA	No	Yes	Yes	No	No	1	No	No	Yes	Kittinger, J. N. and A. L. Ayers. 2010. Shoreline Armoring, Risk Management, and Coastal Resilience Under Rising Seas. Coastal Management 38:634-653.	Yes	Coastal Management	Policy	USA	From a social perspective, environmental degradation increases the vulnerability of coastal communities and threatens ecosystem goods, services and values depended on by society (Adger, 2006; Adger et al., 2005; Cinner & McClanahan, 2006; Worm et al., 2006).	Intro	No	University of Hawaii	No	0	1.194
356	Other	3-5	2009	No	4	Male	Canada	No	No	Yes	No	No	1	No	No	Yes	Klenner, W., A. Arsenault, E. G. Brockerhoff, and A. Vyse. 2009. Biodiversity in forest ecosystems and landscapes: A conference to discuss future directions in biodiversity management for sustainable forestry. Forest Ecology and Management 258:S1-S4.	Yes	Ecosystems	Other	Canada	Changing biodiversity can affect a wide range of ecosystem services such as [...] and productivity in […] marine ecosystems (Worm et al., 2006).	Intro	No	British Columbia Ministry of Forests and Range	No	0	3.495
357	Biology	>5	2008	Yes	2	Female	USA	No	No	No	Yes	No	1	No	No	Yes	Knowlton, N. and J. B. C. Jackson. 2008. Shifting baselines, local impacts, and global change on coral reefs. Plos Biology 6:215-220.	Yes	Plos Biology	Biology	USA	Loss of biodiversity is potentially permanent if it is the result of global extinction, and may also affect ecosystem services, resistance, and resilience [40]	Discussion	No	National Museum of Natural History	No	1	11.452
358	Fisheries	0-2	2008	No	1	Male	Canada	No	No	No	Yes	Yes	2	Yes	No	No	Koeller, P. 2008. Ecosystem-based psychology, or, how I learned to stop worrying and love the data. Fisheries Research 90:1-5.	Yes	Fisheries Research	Fisheries	Canada	The fisheries crisis is not nearly as advanced of course, despite some initial attempts at predicting the future (e.g. Worm et al., 2006), but give it time // I also do not have to worry about whether or not we will understand ecosystems enough and in time to avoid the Armageddon of 2048	Discussion	No	Bedford Institute of Oceanography	No	0	1.586
359	Biology	2-3	2010	No	5	Male	Europe	No	No	No	Yes	Yes	4	No	Yes	Yes	Kraufvelin, P., A. Lindholm, M. F. Pedersen, L. A. Kirkerud, and E. Bonsdorff. 2010. Biomass, diversity and production of rocky shore macroalgae at two nutrient enrichment and wave action levels. Marine Biology 157:29-47.	Yes	Marine Biology	Biology	Finland	Loss of biodiversity through the loss of perennial species is often coupled to eutrophication (e.g. Valiela et al. 1997; Johansson et al. 1998; Rabalais 2005; Worm et al. 2006) // In marine environments, Worm et al. (2006) noticed general positive effects on ecosystem functions with increased species diversity. At the same time, it was found that the effects of diversity were weaker in less contr…	Discussion	No	° bo Akademi University	No	0	2.276
360	Other	2-3	2011	No	2	Female	Europe	No	No	No	Yes	No	1	No	No	Yes	Kula, E. and D. Evans. 2011. Dual discounting in cost-benefit analysis for environmental impacts. Environmental Impact Assessment Review 31:180-186.	Yes	Environmental Impact Assessment Review	Other	Turkey	The need for a systems approach is illustrated by Worm (2006) in their report on ocean system depletion where marine biodiversity loss is increasingly impairing the ocean's capacity to provide food, maintain water quality, and recover from perturbations.	Discussion	No	Bahcesehir University	No	0	2.596
361	Other	0-2	2011	No	2	Male	Europe	No	No	No	Yes	No	1	Yes	Yes	No	Lacroix, D. and S. Pioch. 2011. The multi-use in wind farm projects: more conflicts or a win-win opportunity? Aquatic Living Resources 24:129-135.	Yes	Aquatic Living Resources	Other	France	If this rate is maintained, most of the targeted species for fishing will disappear before 2050 (Worm et al. 2006).	Discussion	No	IFREMER	No	0	1.152
362	Ecology	>5	2010	No	5	Female	Europe	No	No	No	Yes	No	1	No	No	No	Laikre, L., M. K. Schwartz, R. S. Waples, N. Ryman, and M. W. G. Ge. 2010. Compromising genetic diversity in the wild: unmonitored large-scale release of plants and animals. Trends in Ecology & Evolution 25:520-529.	Yes	Trends in Ecology & Evolution	Ecology	Sweden	Genetic variation was positively correlated with recovery of seagrass ecosystems following overgrazing and climatic extremes [33]	Discussion	No	Stockholm University	No	0	15.748
363	Ecology	2-3	2010	No	2	Female	Canada	No	No	No	Yes	No	1	No	Yes	No	Lam, M. E. and D. Pauly. 2010. Who is Right to Fish? Evolving a Social Contract for Ethical Fisheries. Ecology and Society 15.	Yes	Ecology and Society	Ecology	Canada	Modern governments, however, have failed both to stop fisheries collapses (Pauly et al. 2002, 2003, Worm et al. 2006)	Discussion	No	University of British Columbia	No	0	2.516
364	Biology	0-2	2008	No	5	Female	Europe	No	No	No	Yes	No	1	No	No	Yes	Lasram, F. B. R., J. A. Tomasini, M. S. Romdhane, T. Do Chi, and D. Mouillot. 2008. Historical colonization of the Mediterranean Sea by Atlantic fishes: do biological traits matter? Hydrobiologia 607:51-62.	Yes	Hydrobiologia	Biology	France	Indeed, overexploited and depleted ecosystems are more prone to the establishment of exotic species than safe and equilibrated ecosystems (Worm et al., 2006)	Discussion	No	Universite´ Montpellier	No	0	1.784
365	Policy	0-2	2009	No	1	Female	Europe	No	No	No	Yes	No	1	Yes	Yes	No	Lee, B. 2009. Managing the interlocking climate and resource challenges. International Affairs 85:1101-+.	Yes	International Affairs	Policy	United Kingdom	According to one study, seafood species may disappear by 2048 as a result of overfishing, pollution, habitat loss and climate change unless action is taken to turn the current trend around. [29]	Discussion	No	Chatham House	No	0	1.256
366	Other	0-2	2007	No	1	Male	Canada	No	No	No	Yes	No	1	No	No	No	Leighton, F. A. 2007. Veterinary medicine for a world in crisis. Canadian Veterinary Journal-Revue Veterinaire Canadienne 48:379-385.	Yes	Canadian Veterinary Journal-Revue Veterinaire Canadienne	Other	Canada	They have reduced the diversity and richness of the plants and animals that are the engines of our ecosystems and, hence, of our own survival, and they have imposed a huge new burden of disease on human society (11;42–44).	Discussion	No	University of Saskatchewan	No	0	1.063
367	Ecology	0-2	2010	No	7	Male	USA	No	Yes	Yes	No	No	1	No	No	No	Leinfelder, B., J. Tao, D. Costa, M. B. Jones, M. Servilla, M. O'Brien, and C. Burt. 2010. A metadata-driven approach to loading and querying heterogeneous scientific data. Ecological Informatics 5:3-8.	Yes	Ecological Informatics	Ecology	USA	Synthesis across […] populations spanning large spatial areas (e.g., Worm et al., 2006) all require data that have been collected by many investigators spanning decades of research.	Intro	No	National Center for Ecological Analysis and Synthesis	No	0	1.432
368	Other	None	2009	No	1	Male	Canada	No	No	No	Yes	No	1	No	No	No	Lertzman, K. 2009. THE PARADIGM OF MANAGEMENT, MANAGEMENT SYSTEMS, AND RESOURCE STEWARDSHIP. Journal of Ethnobiology 29:339-358.	Yes	Journal of Ethnobiology	Anthropology	Canada	Similarly, Ludwig et al. (1993) asserted that resources are almost inevitably overexploited by modern, science-based management systems through a combination of the inherent complexity of the physical and biological systems driving resource dynamics and the social and economic systems driving resource exploitation. This perspective has been supported and expanded upon by a series of more recent l…	Discussion	No	Simon Fraser University	No	0	None
369	Ecology	>5	2007	No	2	Female	USA	No	No	No	Yes	No	2	No	Yes	Yes	Leslie, H. M. and K. L. McLeod. 2007. Confronting the challenges of implementing marine ecosystem-based management. Frontiers in Ecology and the Environment 5:540-548.	Yes	Frontiers in Ecology and the Environment	Ecology	USA	For example, in controlled experiments in marine settings, increased diversity has been shown to lead to increases in ecosystem function, such as biomass production, resource use, and nutrient cycling (Worm et al. 2006). // In an analysis of marine fisheries collapses worldwide, Worm et al. (2006) found that such collapses occurred at a higher rate in marine ecosystems with fewer fish species tha…	Discussion	No	Princeton University	No	0	9.113
370	Ecology	2-3	2008	Yes	2	Female	USA	Yes	Yes	Yes	No	No	1	No	No	No	Lester, S. E. and B. S. Halpern. 2008. Biological responses in marine no-take reserves versus partially protected areas. Marine Ecology-Progress Series 367:49-56.	Yes	Marine Ecology-Progress Series	Ecology	USA	Human activities have broad effects on coastal and oceanic marine systems (Halpern et al. 2008b), often degrading ecosystem services (UNEP 2006), including many fisheries worldwide (Gewin 2004, Worm et al. 2006).	Intro	No	University of California, Santa Cruz	No	1	2.711
371	Ecology	2-3	2009	Yes	8	Female	USA	No	Yes	Yes	No	No	1	No	No	No	Lester, S. E., B. S. Halpern, K. Grorud-Colvert, J. Lubchenco, B. I. Ruttenberg, S. D. Gaines, S. Airame, and R. R. Warner. 2009. Biological effects within no-take marine reserves: a global synthesis. Marine Ecology-Progress Series 384:33-46.	Yes	Marine Ecology-Progress Series	Ecology	USA	Because marine reserves protect all species and habitats in an area from extractive activities, they are a central tool for ecosystem-based management and offer hope for mitigating some of the threats affecting coastal and marine systems (Worm et al. 2006).	Intro	No	University of California, Santa Cruz	No	1	2.711
372	Biology	>5	2009	No	4	Male	USA	Yes	Yes	Yes	No	No	1	No	No	No	Levin, P. S., M. J. Fogarty, S. A. Murawski, and D. Fluharty. 2009. Integrated Ecosystem Assessments: Developing the Scientific Basis for Ecosystem-Based Management of the Ocean. Plos Biology 7:23-28.	Yes	Plos Biology	Biology	USA	Aseries of prominent and controversial papers about the state of marine ecosystems has occupied the pages of high-profile journals over the last decade [1–7]	Intro	No	NOAA Fisheries	No	0	11.452
373	Biology	3-5	2008	No	2	Male	USA	No	Yes	Yes	Yes	No	4	No	Yes	Yes	Levin, S. A. and J. Lubchenco. 2008. Resilience, robustness, and marine ecosystem-based management. Bioscience 58:27-32.	Yes	Bioscience	Biology	USA	Fisheries and other resource systems have declined drastically (Pauly et al. 1998, 2002, Myers and Worm 2003, Millennium Ecosystem Assessment 2006f, 2006g, Worm et al. 2006) as a result of overfishing, bycatch, habitat destruction, nutrient and chemical pollution, and selective fishing on apex predators // Reports from the Pew Oceans Commission (2003), the US Commission on Ocean Policy (2004), th…	Intro / Discussion	No	Princeton University	No	0	4.621
374	Other	3-5	2010	No	3	Female	Canada	No	Yes	Yes	No	No	1	No	Yes	No	Li, L. B., C. Ainsworth, and T. Pitcher. 2010. Presence of harbour seals (Phoca vitulina) may increase exploitable fish biomass in the Strait of Georgia. Progress in Oceanography 87:235-241.	Yes	Progress in Oceanography	Oceanography	Canada	On the other hand, many commercial fish stocks have been seriously depleted worldwide (e.g. Pauly et al., 1998; Worm et al., 2006)	Intro	No	University of British Columbia	No	0	3.142
375	Other	0-2	2012	No	2	Male	USA	Yes	Yes	Yes	No	No	1	No	Yes	No	Li, N. P. and A. A. Yakubu. 2012. A JUVENILE-ADULT DISCRETE-TIME PRODUCTION MODEL OF EXPLOITED FISHERY SYSTEMS. Natural Resource Modeling 25:273-324.	Yes	Natural Resource Modeling	Other	USA	The world’s natural fishery systems are collapsing as a direct result of overfishing and the overcapacity of fishing fleets (Myers [1998], Stoner and Ray-Culp [2000], Worm et al. [2002], Clark and Hare [2006], Eilperin [2006], Worm et al. [2006], Yakubu et al. [2011])	Intro	No	Howard University	No	0	0.556
376	Multidisciplinary	>5	2010	No	8	Male	Other	No	No	No	Yes	No	1	No	Yes	No	Li, Y. Y., O. Monroig, L. A. Zhang, S. Q. Wang, X. Z. Zheng, J. R. Dick, C. H. You, and D. R. Tocher. 2010. Vertebrate fatty acyl desaturase with Delta 4 activity. Proceedings of the National Academy of Sciences of the United States of America 107:16840-16845.	Yes	Proceedings of the National Academy of Sciences of the United States of America	Multidisciplinary	China	with declining fisheries worldwide (43)	Discussion	No	Shantou University	No	0	9.681
377	Other	0-2	2009	No	1	Male	Other	No	No	No	Yes	No	2	Yes	Yes	No	Liao, I. C. 2009. The Role of Aquaculture in Upcoming Food Crisis. Fish Pathology 44:1-8.	Yes	Fish Pathology	Other	Taiwan	However, capture fishery tends to level-off in terms of production, mainly due to the depletion of fishery resources and loss of marine biodiversity (Worm et al., 2006) // Worm et al. (2006) also predicted that all taxa currently fished will collapse by 2048	Discussion	No	National Taiwan Ocean University	No	0	0.721
378	Fisheries	2-3	2011	No	4	Female	USA	No	No	Yes	No	No	1	Yes	Yes	No	Limburg, K. E., R. M. Hughes, D. C. Jackson, and B. Czech. 2011. Human Population Increase, Economic Growth, and Fish Conservation: Collision Course or Savvy Stewardship? Fisheries 36:27-34.	Yes	Fisheries	Fisheries	USA	This is similar to the conclusion drawn by Worm et al. (2006) that all then-currently exploited species would collapse by 2048.	Intro	No	State University of New York in Syracuse	No	0	2.367
379	Other	0-2	2011	No	2	Female	USA	No	No	No	Yes	No	1	No	No	No	Lin, B. B. and P. E. Morefield. 2011. The Vulnverability Cube: A Multi-Dimensional Framework for Assessing Relative Vulnerability. Environmental Management 48:631-643.	Yes	Environmental Management	Other	USA	Estuaries are bodies of water that form the transition zone between fresh water (e.g., rivers) and saltwater (e.g., ocean), providing a unique environment for wildlife, fisheries, and a range of ecosystem services important to society (Beck and others 2001; Worm and others 2006)	Discussion	No	U.S. Environmental Protection Agency	No	0	1.744
380	Other	3-5	2010	No	3	Male	USA	No	No	No	Yes	No	1	No	No	No	Link, J. S., E. A. Fulton, and R. J. Gamble. 2010. The northeast US application of ATLANTIS: A full system model exploring marine ecosystem dynamics in a living marine resource management context. Progress in Oceanography 87:214-234.	Yes	Progress in Oceanography	Oceanography	USA	The second major caution is that many discussions of EBM, especially ecosystem-based fishery management (EBFM), have focused on a single ‘‘silver bullet” solution (e.g. spatial management (Worm et al., 2006)	Discussion	No	National Marine Fisheries Service, NOAA	No	0	3.142
381	Other	3-5	2008	No	7	Male	Europe	No	Yes	Yes	No	No	2	No	Yes	No	Little, D. C., F. J. Murray, E. Azim, W. Leschen, K. Boyd, A. Watterson, and J. A. Young. 2008. Options for producing a warm-water fish in the UK: limits to "Green Growth"? Trends in Food Science & Technology 19:255-264.	Yes	Trends in Food Science & Technology	Other	United Kingdom	While the shift [to aquaculture] addresses certain public concerns, not only over declining fish stocks (Worm et al., 2006) // Depending upon the source of fish used and its trophic level, these feed ingredients can be subject to contamination with persistent organic compounds and their amplification through the food chain (Worm et al., 2006).	Intro	No	University of Stirling	No	0	3.672
382	Fisheries	2-3	2009	No	2	Male	USA	No	No	No	Yes	No	1	No	No	No	Litzow, M. A. and D. Urban. 2009. Fishing through (and up) Alaskan food webs. Canadian Journal of Fisheries and Aquatic Sciences 66:201-211.	Yes	Canadian Journal of Fisheries and Aquatic Sciences	Fisheries	USA	However, a rigorous debate has recently played out over the exact nature of the global fisheries crisis (e.g., Sibert et al. 2006; Worm et al. 2006; Hilborn 2007)	Discussion	No	NOAA Fisheries	No	0	2.213
383	Fisheries	0-2	2010	No	4	Male	Other	Yes	Yes	Yes	No	No	1	No	Yes	No	Liu, S. Y. V., C. H. Wang, J. C. Shiao, and C. F. Dai. 2010. Population connectivity of neon damsel, Pomacentrus coelestis, inferred from otolith microchemistry and mtDNA. Marine and Freshwater Research 61:1416-1424.	Yes	Marine and Freshwater Research	Fisheries	Taiwan	As resource overexploitation in marine ecosystems has become an urgent issue over the last few decades (Worm et al. 2006)	Intro	No	National Taiwan University	No	0	1.595
384	Multidisciplinary	0-2	2007	No	5	Unknown	Other	No	No	Yes	No	No	1	No	No	Yes	Liu, Y., Y. P. Zhang, D. M. He, M. Cao, and H. Zhu. 2007. Climatic control of plant species richness along elevation gradients in the Longitudinal Range-Gorge Region. Chinese Science Bulletin 52:50-58.	Yes	Chinese Science Bulletin	Multidisciplinary	China	Numerous studies have suggested that biodiversity enhances ecosystem reliability and affects ecosystem services and functioning [22-24]	Intro	No	Chinese Academy of Sciences	No	0	1.321
385	Biology	3-5	2009	No	1	Male	Europe	Yes	Yes	Yes	No	No	1	No	Yes	No	Lobon-Cervia, J. 2009. Why, when and how do fish populations decline, collapse and recover? The example of brown trout (Salmo trutta) in Rio Chaballos (northwestern Spain). Freshwater Biology 54:1149-1162.	Yes	Freshwater Biology	Biology	Spain	The decline and collapse of fish populations […] have been widely reported during recent decades together with related deleterious effects on […] ecosystem dynamics (Worm et al., 2006)	Intro	No	Museo Nacional de Ciencias Naturales (CSIC)	No	0	3.29
386	Fisheries	0-2	2007	No	1	Male	Europe	No	No	Yes	Yes	No	13	Yes	Yes	Yes	Longhurst, A. 2007. Doubt and certainty in fishery science: Are we really headed for a global collapse of stocks? Fisheries Research 86:1-5.	Yes	Fisheries Research	Fisheries	Spain	But a recent article in ‘Science’ by Worm et al. (2006) was more alarmist: their analysis of a spatially interpolated version of the FAO archives led these authors to conclude that the rate of stock collapses had accelerated throughout the period 1950–2004. They extrapolate this trend in such a way that many readers understood that all exploited fish and invertebrate stocks could collapse before …	Intro / Discussion	No	Place de l’Eglise	No	0	1.586
387	Biology	>5	2008	No	1	Male	Canada	No	No	No	Yes	No	1	No	No	Yes	Loreau, M. 2008. Biodiversity and ecosystem functioning: The mystery of the deep sea. Current Biology 18:R126-R128.	Yes	Current Biology	Biology	Canada	Recent meta-analyses of these studies show that species diversity generally has a positive but saturating effect on ecosystem processes that is remarkably consistent across trophic levels and ecosystem types [5–7]	Discussion	No	McGill University	No	0	9.647
388	Other	2-3	2010	Yes	1	Female	Canada	No	No	No	Yes	No	5	No	No	Yes	Lotze, H. K. 2010. HISTORICAL RECONSTRUCTION OF HUMAN-INDUCED CHANGES IN US ESTUARIES. Pages 267-338 in R. N. Gibson, R. J. A. Atkinson, and J. D. M. Gordon, editors. Oceanography and Marine Biology: An Annual Review, Vol 48.	Yes	Oceanography and Marine Biology: An Annual Review	Oceanography	Canada	The losses of these functions and services have brought rising health risks and costs to society, such as increasing beach closures, harmful algal blooms, fish kills, shellfish closures, oxygen depletion, flooding and invasions (Worm et al. 2006) // Diversity has been changed by declines in relative abundance in all taxonomic groups. This has also affected relative abundance of different function…	Discussion	No	Dalhousie University	Yes	1	2.727
389	Ecology	>5	2011	Yes	5	Female	Canada	No	No	Yes	Yes	No	5	No	No	Yes	Lotze, H. K., M. Coll, A. M. Magera, C. Ward-Paige, and L. Airoldi. 2011. Recovery of marine animal populations and ecosystems. Trends in Ecology & Evolution 26:595-605.	Yes	Trends in Ecology & Evolution	Ecology	Canada	Other studies showed that recovery often depends on […] extrinsic factors, such as the type and magnitude of disturbance [21–23] // Cessation of exploitation in marine protected areas (MPAs) around the world resulted in significant increases in species richness of fishes and invertebrates [15,22] // Moreover, significant increases occurred in secondary productivity, ecosystem stability and econom…	Intro / Discussion	No	Dalhousie University	Yes	1	15.748
390	Other	2-3	2010	No	2	Female	USA	No	No	No	Yes	No	3	No	Yes	Yes	Lubchenco, J. and L. E. Petes. 2010. The Interconnected Biosphere: Science at the Ocean's Tipping Points. Oceanography 23:115-129.	Yes	Oceanography	Oceanography	USA	At the global scale, the loss of species from large marine ecosystems has led to a reduction in the ocean’s capacity to provide food, improve water quality, and recover from disturbance (Worm et al., 2006) // This has been documented for areas that are recovering from species loss: as diversity increases, valuable ecosystem services are restored, leading to higher resilience (Worm et al., 2006) /…	Discussion	No	National Oceanic and Atmospheric Administration (NOAA)	No	0	2.986
391	Multidisciplinary	>5	2009	No	5	Male	USA	Yes	Yes	No	Yes	No	2	No	Yes	No	Lynham, J., C. Costello, S. D. Gaines, R. Q. Grafton, and J. Prince. 2009. Diverse Fisheries Require Diverse Solutions Response. Science 323:338-339.	Yes	Science	Multidisciplinary	USA	We agree that ITQs are not a panacea; we simply used them as a convenient subset of rightsbased management to test whether Worm et al.’s prediction (1) of 100% collapse holds true for rights-based fisheries. // The data used by Worm et al. are aggregated over large spatial areas, and ITQ fisheries are the only rights-based fisheries that are implemented on a similar scale.	Discussion	No	University of Hawaii	No	0	32.452
392	Other	2-3	2010	No	2	Male	Canada	No	No	No	Yes	No	1	No	No	Yes	Mackas, D. L. and G. Beaugrand. 2010. Comparisons of zooplankton time series. Journal of Marine Systems 79:286-304.	Yes	Journal of Marine Systems	Oceanography	Canada	Conversely, high diversity is believed to contribute to several ‘positive’ attributes of marine ecosystems, including their resilience to disturbance (Hooper et al., 2005; Worm et al., 2006)	Discussion	No	Fisheries and Oceans Canada	No	0	2.126
393	Policy	>5	2012	No	6	Female	Other	No	No	No	Yes	No	1	No	No	No	Madin, E. M. P., N. C. Ban, Z. A. Doubleday, T. H. Holmes, G. T. Pecl, and F. Smith. 2012. Socio-economic and management implications of range-shifting species in marine systems. Global Environmental Change-Human and Policy Dimensions 22:137-146.	Yes	Global Environmental Change-Human and Policy Dimensions	Policy	Australia	Given these changes, coupled with the many ecosystem services provided by coastal marine biodiversity (Worm et al., 2006),	Discussion	No	University of Technology	No	0	6.868
394	Ecology	>5	2008	No	4	Male	USA	No	Yes	Yes	Yes	No	2	No	No	No	Madin, J. S., S. Bowers, M. P. Schildhauer, and M. B. Jones. 2008. Advancing ecological research with ontologies. Trends in Ecology & Evolution 23:159-168.	Yes	Trends in Ecology & Evolution	Ecology	USA	This situation extends to other fields as well, where the need to address problems of human impacts upon natural systems (such as threats of climate change, and species invasion and extinction) [7–9] increasingly requires access to multi-disciplinary information, including chemical, behavioral, geological, meteorological and sociological data. // Interest in developing ontologies for describing e…	Intro / Discussion	No	National Center for Ecological Analysis and Synthesis	No	0	15.748
395	Other	3-5	2008	No	3	Female	USA	No	No	No	Yes	No	1	No	No	No	Mahaffey, K. R., R. P. Clickner, and R. A. Jeffries. 2008. Methylmercury and omega-3 fatty acids: Co-occurrence of dietary sources with emphasis on fish and shellfish. Environmental Research 107:20-29.	Yes	Environmental Research	Other	USA	The world-wide concern regarding sustainability of fish supplies and over-fishing on species loss (Price, 2001), maintenance of biodiversity (Worm et al., 2005, 2006)	Discussion	No	United States Environmental Protection Agency	No	0	3.398
396	Biology	0-2	2012	No	5	Female	Europe	No	Yes	Yes	No	No	1	No	No	Yes	Malea, P., T. Kevrekidis, N. Papageorgiou, A. Mogias, and C. Arvanitidis. 2012. Do interrelationships among benthic components mirror disturbance levels? Journal of the Marine Biological Association of the United Kingdom 92:235-243.	Yes	Journal of the Marine Biological Association of the United Kingdom	Biology	Greece	One of the implied challenges was to determine the extent to which changes in biodiversity may induce reduction of the potential of ecosystems to perform well and to provide the citizens of the world with products and services (Worm et al., 2006)	Intro	No	Aristotle University of Thessaloniki	No	0	1
397	Other	>5	2008	No	4	Female	Canada	Yes	Yes	Yes	Yes	Yes	2	No	No	Yes	Maranger, R., N. Caraco, J. Duhamel, and M. Amyot. 2008. Nitrogen transfer from sea to land via commercial fisheries. Nature Geoscience 1:111-113.	Yes	Nature Geoscience	Other	Canada	The role of commercial fisheries in altering fish stocks has been explored [4–6] // Although it is generally recognized that global fisheries alter food web structure, fish biomass and diversity in the ocean [3–6]	Abstract / Discussion	No	Universite´ de Montre´ al	No	0	11.754
398	Other	2-3	2009	No	4	Male	Europe	No	Yes	Yes	No	No	1	No	No	No	Margarit, G., J. J. Mallorqui, J. Fortuny-Guasch, and C. Lopez-Martinez. 2009. Phenomenological Vessel Scattering Study Based on Simulated Inverse SAR Imagery. Ieee Transactions on Geoscience and Remote Sensing 47:1212-1223.	Yes	IEEE Transactions on Geoscience and Remote Sensing	Other	Spain	One of the main hot spots is overfishing, as recent studies indicate that 80% of the world’s fisheries are nowadays close to their maximum sustainable production [1], [2].	Intro	No	Universitat Politècnica de Catalunya	No	0	2.895
399	Other	2-3	2009	No	2	Male	Europe	No	No	No	Yes	No	1	No	No	Yes	Martinet, V. and F. Blanchard. 2009. Fishery externalities and biodiversity: Trade-offs between the viability of shrimp trawling and the conservation of Frigatebirds in French Guiana. Ecological Economics 68:2960-2968.	Yes	Ecological Economics	Economics	France	Worm et al. (2006) emphasize the negative consequences of biodiversity loss in marine ecosystems on the productivity and stability of these ecosystems	Discussion	No	AgroParisTech	No	0	2.713
400	Other	2-3	2012	No	11	Female	Other	No	No	No	Yes	No	1	No	No	Yes	Martins, C. D. L., N. Arantes, C. Faveri, M. B. Batista, E. C. Oliveira, P. R. Pagliosa, A. L. Fonseca, J. M. C. Nunes, F. Chow, S. B. Pereira, and P. A. Horta. 2012. The impact of coastal urbanization on the structure of phytobenthic communities in southern Brazil. Marine Pollution Bulletin 64:772-778.	Yes	Marine Pollution Bulletin	Other	Brazil	Species diversity is one of the most important descriptors of a community, since it is related to its productivity and stability (Hooper et al., 2005; Worm et al., 2006)	Discussion	No	Universidade Federal de Santa Catarina	No	0	2.503
401	Other	2-3	2010	No	6	Male	USA	No	No	No	Yes	Yes	1	No	Yes	No	Marty, G. D., P. J. F. Hulson, S. E. Miller, T. J. Quinn, S. D. Moffitt, and R. A. Merizon. 2010. Failure of population recovery in relation to disease in Pacific herring. Diseases of Aquatic Organisms 90:1-14.	Yes	Diseases of Aquatic Organisms	Other	USA	Fishery collapse is often attributed to overfishing, pollution, and habitat destruction (Holmlund & Hammer 1999, Jackson et al. 2001, Worm et al. 2006)	Discussion	No	University of California, Davis	No	0	2.201
402	Fisheries	0-2	2008	No	4	Male	USA	No	No	Yes	No	No	1	No	No	No	Maschner, H. D. G., M. W. Betts, K. L. Reedy-Maschner, and A. W. Trites. 2008. A 4500-year time series of Pacific cod (Gadus macrocephalus) size and abundance: archaeology, oceanic regime shifts, and sustainable fisheries. Fishery Bulletin 106:386-394.	Yes	Fishery Bulletin	Fisheries	USA	Most fisheries management and conservation research has been restricted to interpreting trends and data sets that span just a few decades (Pauly et al., 1998; Worm et al., 2006)	Intro	No	Idaho State University	No	0	1.098
403	Other	0-2	2010	No	1	Male	USA	No	No	No	Yes	No	1	No	No	Yes	Masco, J. 2010. Bad Weather: On Planetary Crisis. Social Studies of Science 40:7-40.	Yes	Social Studies of Science	Other	USA	the oceans are losing the biodiversity that maintains ecological resilience to disease (Stokstad, 2006;Worm et al., 2006)	Discussion	No	University of Chicago	No	0	1.5
404	Ecology	0-2	2010	No	5	Male	Other	No	No	No	Yes	No	1	No	No	No	Matsuda, H., M. Makino, M. Tomiyama, S. Gelcich, and J. C. Castilla. 2010. Fishery management in Japan. Ecological Research 25:899-907.	Yes	Ecological Research	Ecology	Japan	There are many warnings in global marine ecosystems (Pauly et al. 2002; Myers and Worm 2003; Worm et al. 2006).	Discussion	No	Yokohama National University	No	0	1.565
405	Fisheries	0-2	2010	No	1	Male	Other	No	Yes	Yes	No	No	1	No	No	No	Mayfield, S. 2010. Enhancing fishery assessments for an Australian abalone fishery using commercial weight-grade data. Fisheries Research 105:28-37.	Yes	Fisheries Research	Fisheries	Australia	Failure to manage fisheries effectively can have substantial effects on social, economic and ecosystem conditions (Maunder et al., 2006; Worm et al., 2006, 2009)	Intro	No	South Australian Research and Development Institute	No	0	1.586
406	Fisheries	0-2	2011	No	4	Male	Other	No	Yes	Yes	No	No	1	No	Yes	Yes	Mayfield, S., R. C. Chick, I. J. Carlson, and T. M. Ward. 2011. Invertebrate Dive Fisheries Can Be Sustainable: Forty Years of Production from a Greenlip Abalone Fishery off Southern Australia. Reviews in Fisheries Science 19:216-230.	Yes	Reviews in Fisheries Science	Fisheries	Australia	Consequently, there is widespread evidence of over-exploitation and stock collapse (Myers and Worm, 2003; Mora et al., 2009) that has follow-on effects to ecosystem function and biodiversity (Jackson et al., 2001; Lotze et al., 2006; Worm et al., 2006)	Intro	No	South Australian Research and Development Institute	No	0	1.946
407	Other	0-2	2008	No	3	Female	USA	No	No	Yes	No	No	1	No	Yes	No	Maynard, L., S. Saghaian, and M. Nickoloff. 2008. Buyer and Seller Responses to an Adverse Food Safety Event: The Case of Frozen Salmon in Alberta. International Food and Agribusiness Management Review 11:77-95.	Yes	International Food and Agribusiness Management Review	Other	USA	Examples of other negative issues that might reduce seafood demand include […] trends toward collapse of major ocean fisheries (Worm et al., 2006).	Intro	No	University of Kentucky	No	0	0.283
408	Other	0-2	2007	No	2	Female	Europe	No	No	No	Yes	No	1	Yes	Yes	No	McCarthy, E. and F. Lichtman. 2007. The sea from space - Applying remote sensing to social needs. Marine Technology Society Journal 41:4-15.	Yes	Marine Technology Society Journal	Other	Italy	A recent study found that, based on the current trajectory, a complete collapse of all species presently fished could occur within forty years (Worm et al., 2006)	Discussion	No	NATO Undersea Research Center	No	0	0.528
409	Conservation	3-5	2008	No	11	Male	USA	No	No	No	Yes	No	1	No	No	No	McClanahan, T. R., J. E. Cinner, J. Maina, N. A. J. Graham, T. M. Daw, S. M. Stead, A. Wamukota, K. Brown, M. Ateweberhan, V. Venus, and N. V. C. Polunin. 2008. Conservation action in a changing climate. Conservation Letters 1:53-59.	Yes	Conservation Letters	Conservation	USA	We predict that the current emphasis on the creation of closures, which are expected to build ecological resilience and minimize climate change impacts through increasing grazing capacity and coral recovery trajectories (Worm et al. 2006; Mumby et al. 2007)	Discussion	No	Wildlife Conservation Society	No	0	4.082
410	Ecology	>5	2008	No	3	Male	USA	No	Yes	Yes	No	No	1	No	No	No	McClanahan, T. R., C. C. Hicks, and E. S. Darling. 2008. Malthusian overfishing and efforts to overcome it on Kenyan coral reefs. Ecological Applications 18:1516-1529.	Yes	Ecological Applications	Ecology	USA	Investigations that determine how these factors can influence catch are needed for management tools to alleviate the growing global fisheries crises (McGoodwin 1990, Worm et al. 2006, Newton et al. 2007).	Intro	No	Wildlife Conservation Society	No	0	5.102
411	Fisheries	>5	2008	No	2	Female	USA	No	Yes	Yes	No	No	1	No	No	No	McCluskey, S. M. and R. L. Lewison. 2008. Quantifying fishing effort: a synthesis of current methods and their applications. Fish and Fisheries 9:188-200.	Yes	Fish and Fisheries	Fisheries	USA	This increase in fishing pressure has raised concerns about the sustainable removal of both target [catch] (Worm et al. 2006)	Intro	No	Duke University	No	0	5.8
412	Other	0-2	2009	No	3	Male	USA	No	Yes	Yes	No	No	1	No	Yes	No	McGough, B., A. J. Plantinga, and C. Costello. 2009. Optimally Managing a Stochastic Renewable Resource under General Economic Conditions. B E Journal of Economic Analysis & Policy 9.	Yes	B E Journal of Economic Analysis & Policy	Economics	USA	Despite this, overexploitation of fish stocks is a chronic problem worldwide (Food and Agriculture Organization 2004; Worm et al. 2006)	Intro	No	Oregon State University	No	0	0.55
413	Ecology	0-2	2007	No	4	Female	USA	No	Yes	Yes	No	No	1	No	No	No	McIntosh, A. C. S., J. B. Cushing, N. M. Nadkarni, and L. Zeman. 2007. Database design for ecologists: Composing core entities with observations. Ecological Informatics 2:224-236.	Yes	Ecological Informatics	Ecology	USA	Ecological synthesis will likely involve large-scale and long-term data from multiple sites and require extensive data sharing and data mining (http://www.evergreen.edu/bdei; e.g., Knapp and Smith, 2001; Peterson and Vieglais, 2001;Worm et al., 2006)	Intro	No	The Evergreen State College	No	0	1.432
414	Ecology	>5	2010	No	3	Female	Europe	No	Yes	Yes	No	No	1	No	No	Yes	McLaughlin, O. B., T. Jonsson, and M. C. Emmerson. 2010. Temporal Variability in Predator-Prey Relationships of a Forest Floor Food Web. Pages 171-264 in G. Woodward, editor. Advances in Ecological Research: Ecological Networks, Vol 42.	Yes	Advances in Ecological Research: Ecological Networks	Ecology	United Kingdom	Empirically predicting the consequences of biodiversity loss from complex multitrophic systems is often limited by the feasibility of replicating large-scale factorial experiments that examine the effects of biodiversity on ecosystem processes, such as primary productivity, secondary production and decomposition rates (Hector et al., 1999; Jonsson and Malmqvist, 2000; Worm et al., 2006)	Intro	No	Queens University	No	0	5.333
415	Fisheries	0-2	2011	No	4	Male	Europe	No	No	No	Yes	No	1	No	Yes	No	Merino, G., M. Barange, L. Rodwell, and C. Mullon. 2011. Modelling the sequential geographical exploitation and potential collapse of marine fisheries through economic globalization, climate change and management alternatives. Scientia Marina 75:779-790.	Yes	Scientia Marina	Fisheries	United Kingdom	While the global collapse emerges here as a result of a theoretical simulation, it has been predicted using real fisheries data (Worm et al., 2006)	Discussion	No	Plymouth Marine Laboratory	No	0	1.278
416	Other	0-2	2011	No	1	Male	USA	No	No	No	Yes	No	1	Yes	Yes	No	Merrill, J. W. 2011. TRAWLING FOR MEANING: A NEW STANDARD FOR "BEST SCIENTIFIC INFORMATION AVAILABLE" IN THE MAGNUSON-STEVENS FISHERIES CONSERVATION ACT. Catholic University Law Review 60:475-503.	Yes	Catholic University Law Review	Other	USA	Just before Congress passed the 2007 Act was passed, a scientific study by Boris Worm claimed that, at the then-current harvesting rates, the oceans would become a barren wasteland by 2048. See Boris Worm et al., Impacts of Biodiversity Loss on Ocean Ecosystem Services, 314 Sci. 787, 790 (2006).	Discussion	No	The Catholic University of America	No	0	0.333
417	Other	>5	2009	No	3	Female	Other	No	Yes	Yes	No	No	2	No	Yes	Yes	Miller, K. J., B. T. Maynard, and C. N. Mundy. 2009. Genetic diversity and gene flow in collapsed and healthy abalone fisheries. Molecular Ecology 18:200-211.	Yes	Molecular Ecology	Other	Australia	Indeed, current estimates indicate 29% of the world’s fisheries have collapsed and are no longer economically viable, and these levels are predicted to rise (Worm et al. 2006). // One of the major issues associated with fisheries management is optimizing yield without compromising ecosystem or population processes (Fogarty et al. 1991; Caddy & Seijo 2005; Worm et al. 2006)	Intro	No	University of Tasmania	No	0	5.522
418	Other	>5	2011	No	3	Male	Europe	No	No	Yes	No	No	1	No	Yes	No	Minghetti, M., M. J. Leaver, and D. R. Tocher. 2011. Transcriptional control mechanisms of genes of lipid and fatty acid metabolism in the Atlantic salmon (Salmo salar L.) established cell line, SHK-1. Biochimica Et Biophysica Acta-Molecular and Cell Biology of Lipids 1811:194-202.	Yes	Biochimica Et Biophysica Acta-Molecular and Cell Biology of Lipids	Other	United Kingdom	However, with the decline in commercial fisheries [19]	Intro	No	University of Stirling	No	0	5.269
419	Ecology	2-3	2012	No	7	Female	Europe	Yes	Yes	Yes	No	No	1	No	No	Yes	Mirto, S., M. Gristina, M. Sinopoli, G. Maricchiolo, L. Genovese, S. Vizzini, and A. Mazzola. 2012. Meiofauna as an indicator for assessing the impact of fish farming at an exposed marine site. Ecological Indicators 18:468-476.	Yes	Ecological Indicators	Ecology	Italy	The rapid expansion of marine aquaculture is a potential solution to the problem of overfishing and fisheries depletion worldwide, but is also a major threat to marine ecosystems (Jackson, 2001; Schiermeier, 2002), reducing the value of the natural capital and benefits that humans gather from the exploitation of resources in coastal areas (Worm et al., 2006).	Intro	No	Institute for Coastal Marine Environment (IAMC), CNR	No	0	2.695
420	Ecology	>5	2009	No	3	Male	Canada	Yes	Yes	Yes	No	No	1	No	No	No	Molloy, P. P., I. B. McLean, and I. M. Cote. 2009. Effects of marine reserve age on fish populations: a global meta-analysis. Journal of Applied Ecology 46:743-751.	Yes	Journal of Applied Ecology	Ecology	Canada	Of the numerous threats to marine biodiversity, fishing is arguably the most pervasive (Halpern et al. 2008) and damaging (Watling & Norse 1998; Roberts & Hawkins 1999; Worm et al. 2006)	Intro	No	Simon Fraser University	No	0	5.045
421	Other	2-3	2011	No	7	Female	Other	No	No	No	Yes	No	1	No	No	Yes	Moloney, C. L., M. A. St John, K. L. Denman, D. M. Karl, F. W. Koster, S. Sundby, and R. P. Wilson. 2011. Weaving marine food webs from end to end under global change. Journal of Marine Systems 84:106-116.	Yes	Journal of Marine Systems	Other	South Africa	Marine biodiversity is believed to influence the delivery of ecosystem services such as fisheries production (Worm et al., 2006)	Discussion	No	University of Cape Town	No	0	2.126
422	Other	>5	2010	No	6	Male	Europe	No	No	Yes	No	No	1	No	Yes	No	Monroig, O., X. Z. Zheng, S. Morais, M. J. Leaver, J. B. Taggart, and D. R. Tocher. 2010. Multiple genes for functional Delta 6 fatty acyl desaturases (Fad) in Atlantic salmon (Salmo salar L.): Gene and cDNA characterization, functional expression, tissue distribution and nutritional regulation. Biochimica Et Biophysica Acta-Molecular and Cell Biology of Lipids 1801:1072-1081.	Yes	Biochimica Et Biophysica Acta-Molecular and Cell Biology of Lipids	Other	United Kingdom	With declining fisheries worldwide [22]	Intro	No	University of Stirling	No	0	5.269
423	Other	2-3	2010	No	7	Female	Europe	No	Yes	Yes	No	No	1	No	No	No	Montefalcone, M., V. Parravicini, M. Vacchi, G. Albertelli, M. Ferrari, C. Morri, and C. N. Bianchi. 2010. Human influence on seagrass habitat fragmentation in NW Mediterranean Sea. Estuarine Coastal and Shelf Science 86:292-298.	Yes	Estuarine Coastal and Shelf Science	Other	Italy	The marine realm is characterized by a comparatively higher functional connectivity than the terrestrial one (Worm et al., 2006)	Intro	No	University of Genoa	No	0	2.247
424	Other	2-3	2009	No	10	Male	USA	No	No	No	Yes	No	1	No	No	No	Mooney, H., A. Larigauderie, M. Cesario, T. Elmquist, O. Hoegh-Guldberg, S. Lavorel, G. M. Mace, M. Palmer, R. Scholes, and T. Yahara. 2009. Biodiversity, climate change, and ecosystem services. Current Opinion in Environmental Sustainability 1:46-54.	Yes	Current Opinion in Environmental Sustainability	Other	USA	The principal ocean-derived ecosystem services used by humans including tourism, fisheries, nursery habitats are therefore all compromised [24]	Discussion	No	Stanford University	No	0	2.438
425	Biology	>5	2010	No	1	Male	USA	No	No	No	Yes	No	1	No	No	Yes	Mooney, H. A. 2010. The ecosystem-service chain and the biological diversity crisis. Philosophical Transactions of the Royal Society B-Biological Sciences 365:31-39.	Yes	Philosophical Transactions of the Royal Society B-Biological Sciences	Biology	USA	Probing these relationships is not limited to terrestrial ecosystems but also extends to marine systems (Worm et al. 2006).	Discussion	No	Stanford University	No	0	6.401
426	Biology	>5	2009	Yes	10	Male	USA	No	Yes	Yes	Yes	No	2	No	No	Yes	Mora, C., R. A. Myers, M. Coll, S. Libralato, T. J. Pitcher, R. U. Sumaila, D. Zeller, R. Watson, K. J. Gaston, and B. Worm. 2009. Management Effectiveness of the World's Marine Fisheries. Plos Biology 7.	Yes	Plos Biology	Biology	USA	Severe reductions in abundance can […] trigger broader ecosystem changes (e.g., [8–10]) // The ongoing decline in marine fisheries catches [5,9,33–36]	Intro / Conclusions	No	Scripps Institution of Oceanography	No	2	11.452
427	Biology	>5	2008	No	3	Male	Canada	No	No	No	Yes	Yes	1	No	Yes	No	Mora, C., D. P. Tittensor, and R. A. Myers. 2008. The completeness of taxonomic inventories for describing the global diversity and distribution of marine fishes. Proceedings of the Royal Society B-Biological Sciences 275:149-155.	Yes	Proceedings of the Royal Society B-Biological Sciences	Biology	Canada	Given that current projections on biodiversity change and the extent of human threats predict major biodiversity losses within the next half of a century (Thomas et al. 2004; Worm et al. 2006)	Discussion	No	Dalhousie University	No	0	5.415
428	Multidisciplinary	>5	2010	No	4	Male	Other	Yes	Yes	Yes	No	No	1	No	No	Yes	Morato, T., S. D. Hoyle, V. Allain, and S. J. Nicol. 2010. Seamounts are hotspots of pelagic biodiversity in the open ocean. Proceedings of the National Academy of Sciences of the United States of America 107:9707-9711.	Yes	Proceedings of the National Academy of Sciences of the United States of America	Multidisciplinary	New Caledonia	For the last decade there has been considerable debate about the status and sustainability of pelagic fisheries around the world (1–6) and their effects on the ecosystems that support them (7–10)	Intro	No	Secretariat of the Pacific Community	No	0	9.681
429	Policy	0-2	2012	No	8	Female	USA	Yes	Yes	Yes	No	No	1	No	Yes	No	Moreno-Baez, M., R. Cudney-Bueno, B. J. Orr, W. W. Shaw, T. Pfister, J. Torre-Cosio, R. Loaiza, and M. Rojo. 2012. Integrating the spatial and temporal dimensions of fishing activities for management in the Northern Gulf of California, Mexico. Ocean & Coastal Management 55:111-127.	Yes	Ocean & Coastal Management	Policy	USA	The collapse of many of the world’s fisheries (Jackson et al., 2001; Myers and Worm, 2003; Worm et al., 2006)	Intro	No	University of Arizona	No	0	1.333
430	Ecology	2-3	2009	No	11	Male	Europe	No	Yes	Yes	No	No	1	No	No	Yes	Morris, E. P., G. Peralta, J. Benavente, R. Freitas, A. M. Rodrigues, V. Quintino, O. Alvarez, N. Valcarcel-Perez, J. J. Vergara, I. Hernandez, and J. L. Perez-Llorens. 2009. Caulerpa prolifera stable isotope ratios reveal anthropogenic nutrients within a tidal lagoon. Marine Ecology-Progress Series 390:117-128.	Yes	Marine Ecology-Progress Series	Ecology	Spain	These shifts [in the benthic autotrophic community] can have consequences for the diversity and functioning of coastal ecosystems (Bachelet et al. 2000, Worm et al. 2006, Corzo et al. 2009)	Intro	No	University of Cádiz	No	0	2.711
431	Fisheries	0-2	2009	No	2	Male	Europe	No	No	No	Yes	No	2	No	Yes	No	Mourente, G. and D. R. Tocher. 2009. Tuna Nutrition and Feeds: Current Status and Future Perspectives. Reviews in Fisheries Science 17:373-390.	Yes	Reviews in Fisheries Science	Fisheries	Spain	However, the wild capture fisheries, whether for food- or feed-grade fish, are finite resources that, although potentially renewable, are highly vulnerable so that their sustainability is in question (Worm et al., 2006). // Over-exploitation (fishing) of individual fish species, whether for direct human consumption or reduction to fish meal and fish oil, has caused the collapse or near collapse o…	Discussion	No	University of Cádiz	No	0	1.946
432	Policy	0-2	2012	No	4	Male	Canada	No	No	Yes	No	No	1	No	Yes	No	Mullowney, D. R. J., C. J. Morris, E. G. Dawe, and K. R. Skanes. 2012. Impacts of a bottom trawling exclusion zone on Snow Crab abundance and fish harvester behavior in the Labrador Sea, Canada. Marine Policy 36:567-575.	Yes	Marine Policy	Policy	Canada	the status of fishery resources […] will generally continue to decline without improved strategies [20]	Intro	No	Fisheries and Oceans Canada	No	0	1.865
433	Fisheries	>5	2008	No	4	Male	Other	No	No	No	Yes	No	1	No	No	Yes	Munday, P. L., G. P. Jones, M. S. Pratchett, and A. J. Williams. 2008. Climate change and the future for coral reef fishes. Fish and Fisheries 9:261-285.	Yes	Fish and Fisheries	Fisheries	Australia	and although diverse multi-species fisheries are likely to be more resilient to environmental change than highly specialized fisheries (Worm et al. 2006)	Discussion	No	James Cook University	No	0	5.8
434	Other	0-2	2009	No	8	Female	Canada	Yes	Yes	Yes	No	No	1	No	Yes	No	Murchie, K. J., S. E. Danylchuk, C. E. Pullen, E. Brooks, A. D. Shultz, C. D. Suski, A. J. Danylchuk, and S. J. Cooke. 2009. Strategies for the capture and transport of bonefish, Albula vulpes, from tidal creeks to a marine research laboratory for long-term holding. Aquaculture Research 40:1538-1550.	Yes	Aquaculture Research	Other	Canada	In recent years, the apparent world-wide decline in marine fish populations (e.g., Pauly, Alder, Bennett, Christensen, Tyedmers & Watson 2003; Pauly, Watson & Alder 2005; Worm, Barbier, Beaumont, Du¡y, Folke, Halpern, Jackson, Lotze, Micheli, Palumbi, Sala, Selkoe, Stachowicz & Watson 2006)	Intro	No	Carleton University	No	0	1.203
435	Ecology	>5	2008	No	1	Male	USA	No	No	No	Yes	No	1	No	No	Yes	Naeem, S. 2008. Advancing realism in biodiversity research. Trends in Ecology & Evolution 23:414-416.	Yes	Trends in Ecology & Evolution	Ecology	USA	Although the study of BEF [biodiversity and ecosystem functioning] was initially controversial, [...] meta-analyses [5,6] have established BEF [biodiversity and ecosystem functioning] research as a robust body of findings that support significant influences of biodiversity on ecosystem functioning.	Discussion	No	Columbia University	No	0	15.748
436	Multidisciplinary	>5	2008	No	1	Male	USA	No	No	No	Yes	No	1	No	No	Yes	Naeem, S. 2008. Ecology - Green with complexity. Science 319:913-914.	Yes	Science	Multidisciplinary	USA	Recent research suggests that diversity in higher trophic levels has similar effects (more consumer diversity, more consumer biomass) (6, 7).	Discussion	No	Columbia University	No	0	32.452
437	Multidisciplinary	>5	2009	No	1	Male	USA	No	No	No	Yes	No	1	No	No	Yes	Naeem, S. 2009. ECOLOGY Gini in the bottle. Nature 458:579-580.	Yes	Nature	Multidisciplinary	USA	Today, evidence that plant, animal and microbial biodiversity influences […] marine ecosystem functions [4]	Discussion	No	Columbia University	No	0	36.28
438	Multidisciplinary	>5	2012	Yes	3	Male	USA	No	No	No	Yes	No	1	No	No	Yes	Naeem, S., J. E. Duffy, and E. Zavaleta. 2012. The Functions of Biological Diversity in an Age of Extinction. Science 336:1401-1406.	Yes	Science	Multidisciplinary	USA	Meta-analyses and integrative studies can help to address this issue. Meta-analyses have identified central tendencies in biodiversity and ecosystem functioning’s diverse arrays of studies [e.g., (42–46)]	Discussion	No	Columbia University	No	1	32.452
439	Ecology	>5	2011	No	4	Male	USA	No	No	Yes	No	No	1	No	No	Yes	Naidoo, R., L. C. Weaver, G. Stuart-Hill, and J. Tagg. 2011. Effect of biodiversity on economic benefits from communal lands in Namibia. Journal of Applied Ecology 48:310-316.	Yes	Journal of Applied Ecology	Ecology	USA	Crucially, however, save for one case from marine fisheries (Worm et al. 2006), none of these studies have examined the provision of ecosystem services at varying levels of biodiversity in a natural system.	Intro	No	World Wildlife Fund - USA	No	0	5.045
440	Multidisciplinary	3-5	2010	No	7	Female	Europe	Yes	Yes	Yes	No	No	3	No	No	Yes	Narayanaswamy, B. E., P. E. Renaud, G. C. A. Duineveld, J. Berge, M. S. S. Lavaleye, H. Reiss, and T. Brattegard. 2010. Biodiversity Trends along the Western European Margin. Plos One 5.	Yes	PLoS One	Multidisciplinary	United Kingdom	As anthropogenic disturbance and climate change threaten biodiversity in terrestrial and marine habitats, one of the urgent challenges in ecosystem research is to identify causal links between biodiversity and ecosystem functioning (BEF) and services [1] // Examples of BEF studies conducted on much larger scales and involving natural ecosystems in the marine realm are those by Worm et al. [1] // …	Intro	No	Scottish Marine Institute	No	0	4.092
441	Ecology	>5	2012	No	2	Female	Canada	No	No	Yes	No	No	1	No	No	Yes	Narwani, A. and A. Mazumder. 2012. Bottom-up effects of species diversity on the functioning and stability of food webs. Journal of Animal Ecology 81:701-713.	Yes	Journal of Applied Ecology	Ecology	Canada	More generally, species diversity has been found to have positive effects on average levels of a variety of ecosystem functions, including nutrient uptake, resource use efficiency, carbon fixation, respiration, decomposer activity, secondary production and resistance to disturbance (Cardinale et al. 2006; Balvanera et al. 2006; Worm et al. 2006; Ptacnik et al. 2008; reviewed in Schmid et al. 2009…	Intro	No	University of Victoria	No	0	5.045
442	Other	0-2	2010	No	3	Male	Other	No	No	Yes	No	No	1	No	No	No	Navarrete, S. A., S. Gelcich, and J. C. Castilla. 2010. Long-term monitoring of coastal ecosystems at Las Cruces, Chile: Defining baselines to build ecological literacy in a world of change. Revista Chilena De Historia Natural 83:143-157.	Yes	Revista Chilena De Historia Natural	Other	Chile	In this thorny and often polemic endeavor (e.g. Worm et al. 2006, Jaenike 2007, Murawski et al. 2007, Worm et al. 2007)	Intro	No	Pontificia Universidad Católica de Chile	No	0	0.85
443	Fisheries	2-3	2011	No	3	Male	Canada	No	No	Yes	No	No	1	No	Yes	No	Neff, B. D., S. R. Garner, and T. E. Pitcher. 2011. Conservation and enhancement of wild fish populations: preserving genetic quality versus genetic diversity. Canadian Journal of Fisheries and Aquatic Sciences 68:1139-1154.	Yes	Canadian Journal of Fisheries and Aquatic Sciences	Fisheries	Canada	Furthermore, over the last 20 years, catches of more than a quarter of all fished species fell below 10% of their previous levels (Worm et al. 2006)	Intro	No	University of Western Ontario	No	0	2.213
444	Other	3-5	2009	No	5	Male	Other	No	Yes	Yes	No	No	2	No	No	No	Neira, S., C. L. Moloney, P. Cury, C. Mullon, and V. Christensen. 2009. Mechanisms affecting recovery in an upwelling food web: The case of the southern Humboldt. Progress in Oceanography 83:404-416.	Yes	Progress in Oceanography	Oceanography	Chile	For this reason, fishing is considered the main threat to marine ecosystems (Jackson et al., 2001; Pauly et al., 2002; Worm et al., 2006) // The reversibility of these ecosystem-scale changes is still poorly known, but is of importance for fisheries science and management due to their potential ecological, economic and social consequences (Worm et al., 2006)	Intro	No	Centro de Investigación en Ecosistemas de la Patagonia	No	0	3.142
445	Other	0-2	2008	No	2	Male	Europe	No	No	No	Yes	No	1	No	No	No	Nellen, W. and J. Dulcic. 2008. Evolutionary steps in ichthyology and new challenges. Acta Adriatica 49:201-232.	Yes	Acta Adriatica	Other	Germany	It should be mentioned as well that once awhile publications appear which speculative and cursory approach, respectively, and which are annoying and in no way helpful (WORM et al., 2006) especially when getting published in prestigious journals and which invite much criticism (HILBORN, 2006, 2007; HÖLKER et al., 2007)	Discussion	No	University of Hamburg	No	0	0.5
446	Other	0-2	2010	No	3	Male	Other	No	No	No	Yes	No	1	Yes	Yes	No	Nichols, P. D., J. Petrie, and S. Singh. 2010. Long-Chain Omega-3 Oils-An Update on Sustainable Sources. Nutrients 2:572-585.	Yes	Nutrients	Other	Australia	It has been further stated that ocean and fish stock health are considered so under threat that by 2048 ‘all commercial fish and seafood may collapse’ [17]	Discussion	No	CSIRO Food Futures Flagship	No	0	0.676
447	Other	2-3	2007	No	6	Female	Europe	No	Yes	Yes	No	No	1	No	Yes	No	Nicolas, D., F. Le Loc'h, Y. Desaunay, D. Hamon, A. Blanchet, and O. Le Pape. 2007. Relationships between benthic macrofauna and habitat suitability for juvenile common sole (Solea solea, L.) in the Vilaine estuary (Bay of Biscay, France) nursery ground. Estuarine Coastal and Shelf Science 73:639-650.	Yes	Estuarine Coastal and Shelf Science	Other	France	at a time when most adult fish stocks are stressed by fisheries (Worm et al., 2006)	Intro	No	Agrocampus Rennes	No	0	2.247
448	Other	3-5	2012	No	3	Male	Europe	No	Yes	Yes	No	No	1	No	No	Yes	Nogueira, E., G. Gonzalez-Nuevo, and L. Valdes. 2012. The influence of phytoplankton productivity, temperature and environmental stability on the control of copepod diversity in the North East Atlantic. Progress in Oceanography 97:92-107.	Yes	Progress in Oceanography	Oceanography	Spain	However, while the patterns have become increasingly well documented, especially in the last decade due to the concerns about the impacts of global change on the erosion of diversity and its effect on ecosystem function and dynamics (Chown and Gaston, 2000; Worm et al., 2006)	Intro	No	Centro Oceanográfico de Gijón	No	0	3.142
449	Biology	>5	2012	No	1	Male	Europe	No	No	No	Yes	No	1	No	No	Yes	Norris, K. 2012. Biodiversity in the context of ecosystem services: the applied need for systems approaches. Philosophical Transactions of the Royal Society B-Biological Sciences 367:191-199.	Yes	Philosophical Transactions of the Royal Society B-Biological Sciences	Biology	United Kingdom	It has long been recognized that biodiversity plays an important functional role in ecosystems [14,31–33]	Discussion	No	University of Reading	No	0	6.401
450	Policy	0-2	2012	Yes	14	Male	USA	No	No	Yes	No	No	1	No	No	No	Norse, E. A., S. Brooke, W. W. L. Cheung, M. R. Clark, L. Ekeland, R. Froese, K. M. Gjerde, R. L. Haedrich, S. S. Heppell, T. Morato, L. E. Morgan, D. Pauly, R. Sumaila, and R. Watson. 2012. Sustainability of deep-sea fisheries. Marine Policy 36:307-320.	Yes	Marine Policy	Policy	USA	Governments and international governing organizations need to know this because maintaining biodiversity in the deep sea is crucial to biogeochemistry on a global scale, and hence to humankind [22,23]	Intro	No	Marine Conservation Institute	No	1	1.865
451	Ecology	None	2012	No	1	Male	Europe	No	No	No	Yes	No	1	Yes	Yes	No	Northcott, M. S. 2012. Artificial persons against nature: environmental governmentality, economic corporations, and ecological ethics. Pages 104-117 in R. S. Ostfeld and W. H. Schlesinger, editors. Year in Ecology and Conservation Biology.	Yes	Year in Ecology and Conservation Biology	Ecology	United Kingdom	Overharvesting threatens turning large areas of the marine environment into marine deserts by midcentury at present rates of destruction. [15]	Discussion	No	University of Edinburgh	No	0	None
452	Other	3-5	2007	No	1	Female	Other	Yes	Yes	Yes	No	No	1	No	Yes	No	Nowak, B. F. 2007. Parasitic diseases in marine cage culture - An example of experimental evolution of parasites? International Journal for Parasitology 37:581-588.	Yes	International Journal for Parasitology	Other	Australia	As wild fisheries continue to decline (Hutchings, 2000; Worm et al., 2006)	Intro	No	University of Tasmania	No	0	3.393
453	Ecology	>5	2010	No	2	Male	Europe	No	No	Yes	No	No	1	No	Yes	No	O'Gorman, E. J. and M. C. Emmerson. 2010. Manipulating Interaction Strengths and the Consequences for Trivariate Patterns in a Marine Food Web. Pages 301-419 in G. Woodward, editor. Advances in Ecological Research: Ecological Networks, Vol 42.	Yes	Advances in Ecological Research: Ecological Networks	Ecology	Ireland	We are currently in the midst of a global extinction crisis (Dirzo and Raven, 2003; Pimm et al., 1995, 2006; Sala et al., 2000; Worm et al., 2006)	Intro	No	University College Cork	No	0	5.333
454	Ecology	3-5	2008	No	3	Male	Europe	No	No	Yes	Yes	No	1	No	No	Yes	O'Gorman, E. J., R. A. Enright, and M. C. Emmerson. 2008. Predator diversity enhances secondary production and decreases the likelihood of trophic cascades. Oecologia 158:557-567.	Yes	Oecologia	Ecology	Ireland	A number of recent meta-analyses of studies from the published literature have all demonstrated the positive effect of diversity on ecosystem processes (Balvanera et al. 2006; Cardinale et al. 2006; Worm et al. 2006) // Furthermore, recent meta-analyses have shown that biodiversity loss is putting increasing pressure on the productivity and stability of marine ecosystems (Worm et al. 2006)	Intro / Discussion	No	University College Cork	No	0	3.412
455	Other	2-3	2011	No	7	Female	Europe	No	No	No	No	No	1	No	No	No	O'Leary, B. C., J. C. R. Smart, F. C. Neale, J. P. Hawkins, S. Newman, A. C. Milman, and C. M. Roberts. 2011. Fisheries mismanagement. Marine Pollution Bulletin 62:2642-2648.	Yes	Marine Pollution Bulletin	Other	United Kingdom	Population collapse 0.1B0 10% of virgin biomass (Worm et al., 2006)	Methods	Yes	University of York	No	0	2.503
456	Biology	>5	2009	No	7	Female	Europe	No	No	No	Yes	Yes	1	No	Yes	No	Olff, H., D. Alonso, M. P. Berg, B. K. Eriksson, M. Loreau, T. Piersma, and N. Rooney. 2009. Parallel ecological networks in ecosystems. Philosophical Transactions of the Royal Society B-Biological Sciences 364:1755-1779.	Yes	Philosophical Transactions of the Royal Society B-Biological Sciences	Biology	Germany	Yet such scientifically informed management has not prevented a general collapse of fish stocks worldwide, especially for species on higher trophic levels (Myers & Worm 2003; Worm & Myers 2004; Worm et al. 2005, 2006; Berkes et al. 2006; Heithaus et al. 2008)	Discussion	No	University of Groningen	No	0	6.401
457	Multidisciplinary	>5	2008	Yes	3	Female	Europe	Yes	Yes	Yes	No	No	2	No	No	No	Olsson, P., C. Folke, and T. P. Hughes. 2008. Navigating the transition to ecosystem-based management of the Great Barrier Reef, Australia. Proceedings of the National Academy of Sciences of the United States of America 105:9489-9494.	Yes	Proceedings of the National Academy of Sciences of the United States of America	Multidisciplinary	Sweden	The widespread degradation of marine ecosystems and their biodiversity (1–3) // We argue that, to understand such transitions, for dealing with the degradation of marine ecosystems (2, 3)	Intro	No	Stockholm University	No	1	9.681
458	Fisheries	0-2	2009	No	1	Male	Other	No	No	No	Yes	No	1	Yes	Yes	No	Oshima, Y. 2009. Reproductive physiological and biochemical studies on the effect of tributyltin to fish and shellfish. Nippon Suisan Gakkaishi 75:354-356.	Yes	Nippon Suisan Gakkaishi	Fisheries	Japan	Worm et al. are saying that the biomass of marine species keeps declining and that by mid 21st century, it might even compromise the fishery [capture fishery]. Overfishing, climate change, and marine pollution due to chemicals are the main reasons they evoke. [In Japanese, seeking translation]	Discussion	No	Kyushu University	No	0	0.11
459	Policy	0-2	2006	No	1	Male	USA	No	No	No	Yes	No	1	No	Yes	No	Oxman, B. H. 2006. The territorial temptation: A siren song at sea. American Journal of International Law 100:830-851.	Yes	American Journal of International Law	Policy	USA	The result is evident in the troubling statistics on the state of the world’s ocean fisheries [97]	Discussion	No	University of Miami	No	0	1.048
460	Ecology	>5	2011	No	2	Male	USA	No	Yes	Yes	Yes	Yes	2	No	No	Yes	Palardy, J. E. and J. D. Witman. 2011. Water flow drives biodiversity by mediating rarity in marine benthic communities. Ecology Letters 14:63-68.	Yes	Ecology Letters	Ecology	USA	In both marine and terrestrial systems, increased levels of biodiversity result in increased ecosystem productivity and stability (Hooper et al. 2005; Worm et al. 2006) // Because it [biodiversity] has been strongly linked to the ability of ecosystems to provide a suite of ecosystem services (Hooper et al. 2005; Worm et al. 2006)	Intro / Discussion	No	Brown University	No	0	17.557
461	Biology	3-5	2008	Yes	3	Male	USA	No	No	No	Yes	No	2	No	Yes	Yes	Palumbi, S. R., K. L. McLeod, and D. Grunbaum. 2008. Ecosystems in action: Lessons from marine ecology about recovery, resistance, and reversibility. Bioscience 58:33-42.	Yes	Bioscience	Biology	USA	Over larger spatial scales, more highly diverse marine ecosystems show a smaller fraction of fished species that have commercially collapsed, and a higher rate of recovery of collapsed species, than large marine ecosystems with less diversity (figure 6; Worm et al. 2006). Ecosystems in which more than 20% of more of the collapsed stocks have recovered are all high-diversity ecosystems. The lowest…	Discussion	No	Stanford University	Yes	1	4.621
462	Ecology	>5	2009	Yes	12	Male	USA	Yes	Yes	Yes	Yes	No	6	No	Yes	Yes	Palumbi, S. R., P. A. Sandifer, J. D. Allan, M. W. Beck, D. G. Fautin, M. J. Fogarty, B. S. Halpern, L. S. Incze, J. A. Leong, E. Norse, J. J. Stachowicz, and D. H. Wall. 2009. Managing for ocean biodiversity to sustain marine ecosystem services. Frontiers in Ecology and the Environment 7:204-211.	Yes	Frontiers in Ecology and the Environment	Ecology	USA	Compelling evidence is accumulating from terrestrial, freshwater, and marine systems to suggest that sustainable ecosystem services depend upon a diverse biota (Daily et al. 1997; Loreau et al. 2001; Tilman et al. 2001; Wall et al. 2004; MA 2005; Sala and Knowlton 2006; Worm et al. 2006; Butler et al. 2007; Hector and Bagchi 2007) // suggest that more diverse assemblages provide either higher pro…	Intro / Discussion	No	Stanford University	Yes	3	9.113
463	Fisheries	0-2	2012	No	2	Female	Other	Yes	Yes	Yes	No	No	1	No	Yes	No	Pande, A. and J. P. A. Gardner. 2012. The Kapiti Marine Reserve (New Zealand): spatial and temporal comparisons of multi-species responses after 8 years of protection. New Zealand Journal of Marine and Freshwater Research 46:71-89.	Yes	New Zealand Journal of Marine and Freshwater Research	Fisheries	New Zealand	Degradation of the world’s oceans and exploitation of its resources have highlighted the need for information about the status of the marine environment (Pauly et al. 1998; Conover et al. 2000; Sale et al. 2005; Worm et al. 2006, 2009; Alder et al. 2010 and references therein)	Intro	No	Victoria University of Wellington	No	0	0.991
464	Other	None	2009	No	5	Male	Other	No	Yes	Yes	No	No	4	Yes	Yes	Yes	Paramo, J., L. Guillot-Illidge, S. Benavides, A. Rodriguez, and C. Sanchez-Ramirez. 2009. Poblational and ecological aspects of demersal fishes in north zone of Colombian Caribbean in relationship with habitat: a tool for identify marine protected areas (mpas) to fisheries management. Caldasia 31:123-144.	Yes	Caldasia	Other	Colombia	Coastal marine fisheries worldwide are under threat of collapse, due to increase in fishing effort, even when catch rates of fish remain stable or falling and other impacts anthropogenic and environmental factors that degrade direct and indirect habitat and ecological systems on which they depend fisheries (Pauly et al., 2002, Sale et al. 2005, Worm et al. 2006) // The loss of marine biodiversity…	Intro	No	Universidad del Magdalena	No	0	None
465	Biology	0-2	2012	No	2	Male	Europe	No	Yes	Yes	No	No	1	No	No	No	Paramo, J. and U. Saint-Paul. 2012. Deep-sea shrimps Aristaeomorpha foliacea and Pleoticus robustus (Crustacea: Penaeoidea) in the Colombian Caribbean Sea as a new potential fishing resource. Journal of the Marine Biological Association of the United Kingdom 92:811-818.	Yes	Journal of the Marine Biological Association of the United Kingdom	Biology	Germany	In this sense, due to failure of traditional fisheries management measures, there is a necessity for additional fisheries management measures to those used traditionally that contribute to protect the fishing resources and to improve the fishing production, such as the identification of marine protected areas that have emerged as a tool for marine conservation and fisheries management (Worm et al…	Intro	No	Universita¨t Bremen	No	0	1
466	Other	0-2	2012	No	2	Male	Europe	No	No	No	Yes	Yes	1	No	No	No	Paramo, J. and U. Saint-Paul. 2012. SPATIAL STRUCTURE OF THE PINK SPECKLED DEEP-SEA SHRIMP PENAEOPSIS SERRATA (BATE, 1881) (DECAPODA, PENAEIDAE) DURING NOVEMBER-DECEMBER 2009 IN THE COLOMBIAN CARIBBEAN SEA. Crustaceana 85:103-116.	Yes	Crustaceana	Other	Germany	Among other measures, the identification of marine protected areas as a tool for marine conservation and fisheries management can be useful, as these follow an ecosystem-based management (Worm et al., 2006; Fraser et al., 2009; Paramo et al., 2009; Jackson & Jacquet, 2011)	Discussion	No	Universita¨t Bremen	No	0	0.464
467	Fisheries	0-2	2012	No	3	Male	Other	No	Yes	Yes	No	No	1	No	No	No	Paramo, J., M. Wolff, and U. Saint-Paul. 2012. Deep-sea fish assemblages in the Colombian Caribbean Sea. Fisheries Research 125:87-98.	Yes	Fisheries Research	Fisheries	Colombia	Such measures may include the creation of marine protected areas as a tool for marine conservation and a fisheries management that follow an ecosystem approach to fisheries (EAF) (Worm et al., 2006; Fraser et al., 2009; Paramo et al., 2009; Jackson and Jacquet, 2011)	Intro	No	Universidad del Magdalena	No	0	1.586
468	Fisheries	2-3	2010	No	1	Male	Other	Yes	Yes	Yes	No	No	1	No	No	No	Parslow, J. 2010. Individual transferable quotas and the "tragedy of the commons". Canadian Journal of Fisheries and Aquatic Sciences 67:1889-1896.	Yes	Canadian Journal of Fisheries and Aquatic Sciences	Fisheries	Australia	While there is debate over the exact state and likely future trends in global fisheries (Worm et al. 2006; Hilborn 2007a)	Intro	No	CSIRO	No	0	2.213
469	Other	2-3	2011	No	7	Female	Europe	No	No	Yes	No	No	1	No	No	Yes	Pascual, M., A. Borja, S. V. Eede, K. Deneudt, M. Vincx, I. Galparsoro, and I. Legorburu. 2011. Marine biological valuation mapping of the Basque continental shelf (Bay of Biscay), within the context of marine spatial planning. Estuarine Coastal and Shelf Science 95:186-198.	Yes	Estuarine Coastal and Shelf Science	Other	Spain	The provision of some goods and services is linked to biodiversity, although the exact mechanisms and quantifications of this linkage are not yet well known (Nunes and van den Bergh, 2001; Balvanera et al., 2006; Beaumont et al., 2006 and Worm et al., 2006)	Intro	No	AZTI-Tecnalia, Marine Research Division	No	0	2.247
470	Biology	2-3	2007	No	1	Male	Canada	No	No	No	Yes	No	1	No	No	No	Pauly, D. 2007. The Sea Around Us Project: Documenting and communicating global fisheries impacts on marine ecosystems. Ambio 36:290-295.	Yes	Ambio	Biology	Canada	Fisheries strongly affect marine biodiversity (28)	Discussion	No	University of British Columbia	No	0	2.025
471	Policy	0-2	2012	No	2	Male	Canada	No	No	No	Yes	No	1	Yes	Yes	No	Pauly, D. and R. Froese. 2012. Comments on FAO's State of Fisheries and Aquaculture, or 'SOFIA 2010'. Marine Policy 36:746-752.	Yes	Marine Policy	Policy	Canada	To back such claims, one needs only examine the number of FAO 'stocks’ (species by statistical area which contributed at least 10 t to the time series) which produced less than 10% of their previous maximum catches (Fig. 1C). Given the controversy [14,16] following a previous extrapolation of these data by Worm et al. [17], it as easy to resist the temptation to fit (and extrapolate) a function t…	Discussion	No	University of British Columbia	No	0	1.865
472	Multidisciplinary	0-2	2010	No	3	Male	Europe	No	No	Yes	No	No	1	Yes	Yes	No	Pavlov, D. S., B. R. Striganova, and E. N. Bukvareva. 2010. An Environment-Oriented Concept of Nature Use. Herald of the Russian Academy of Sciences 80:74-82.	Yes	Herald of the Russian Academy of Sciences	Multidisciplinary	Russia	These resources are being used practically to the full, which is proved by the dynamics of global catch and the state of the main trade hydrobiont species [10, 11] // If the current scale of the exploitation of global fishery reserves remains unchanged, 80% of the resource taxa of fishes and marine invertebrates may lose their commercial importance by the mid 21st century [11]	Intro	No	Severtsov Institute of Ecology and Evolution, RAS	No	0	0.252
473	Ecology	3-5	2011	No	2	Male	Canada	Yes	Yes	Yes	No	No	1	No	No	No	Pedruski, M. T. and S. E. Arnott. 2011. The effects of habitat connectivity and regional heterogeneity on artificial pond metacommunities. Oecologia 166:221-228.	Yes	Oecologia	Ecology	Canada	and also one attracting considerable interest given the present high rates of biodiversity loss (Pimm et al. 1995; Thomas et al. 2004; Worm et al. 2006)	Intro	No	Queen's University	No	0	3.412
474	Multidisciplinary	3-5	2012	No	7	Female	Other	No	Yes	Yes	No	No	1	No	No	No	Pelletier, D., K. Leleu, D. Mallet, G. Mou-Tham, G. Herve, M. Boureau, and N. Guilpart. 2012. Remote High-Definition Rotating Video Enables Fast Spatial Survey of Marine Underwater Macrofauna and Habitats. Plos One 7.	Yes	PLoS One	Multidisciplinary	New Caledonia	Marine Protected Areas (MPAs) are a key instrument for the conservation of marine biodiversity and associated ecosystem services [1]	Intro	No	French Institute for the Exploitation of the Sea	No	0	4.092
475	Biology	0-2	2012	No	2	Female	Canada	No	Yes	Yes	No	No	1	No	No	No	Penton, P. M. and G. K. Davoren. 2012. Physical characteristics of persistent deep-water spawning sites of capelin: Importance for delimiting critical marine habitats. Marine Biology Research 8:778-783.	Yes	Marine Biology Research	Biology	Canada	It is becoming increasingly important to identify tools to enhance fisheries management (Hilborn 2007), including no-take marine protected areas (Worm et al. 2006, 2009)	Intro	No	University of Manitoba	No	0	1.055
476	Other	2-3	2009	No	2	Male	Other	No	Yes	Yes	No	No	1	No	No	No	Pereira, G. C. and N. F. F. Ebecken. 2009. Knowledge discovering for coastal waters classification. Expert Systems with Applications 36:8604-8609.	Yes	Expert Systems with Applications	Other	Brazil	These [human] activities have accelerated loss of populations and species (Worm et al., 2006)	Intro	No	Federal University of Rio de Janeiro	No	0	2.203
477	Ecology	3-5	2009	No	3	Male	Europe	No	Yes	Yes	No	No	1	No	No	Yes	Perfectti, F., J. M. Gomez, and J. Bosch. 2009. The functional consequences of diversity in plant-pollinator interactions. Oikos 118:1430-1440.	Yes	Oikos	Ecology	Spain	Most experimental studies agree that species diversity has a positive, albeit saturating, effect on ecosystem functioning (Balvanera et al. 2006, Cardinale et al. 2006, Worm et al. 2006)	Intro	No	University de Granada	No	0	3.061
478	Multidisciplinary	>5	2010	No	18	Male	USA	No	No	No	Yes	No	1	No	No	No	Perrings, C., S. Naeem, F. Ahrestani, D. E. Bunker, P. Burkill, G. Canziani, T. Elmqvist, R. Ferrati, J. A. Fuhrman, F. Jaksic, Z. Kawabata, A. Kinzig, G. M. Mace, F. Milano, H. Mooney, A. H. Prieur-Richard, J. Tschirhart, and W. Weisser. 2010. Ecosystem Services for 2020. Science 330:323-324.	Yes	Science	Multidisciplinary	USA	Also, target 6 addresses threats to fish production. Its implementation would affect and be affected by implementation of targets for other ecosystem services, including regulation of climate [16, 17]	Discussion	No	Arizona State University	No	0	32.452
479	Ecology	>5	2011	No	16	Male	USA	No	No	No	Yes	No	1	No	No	Yes	Perrings, C., S. Naeem, F. S. Ahrestani, D. E. Bunker, P. Burkill, G. Canziani, T. Elmqvist, J. A. Fuhrman, F. M. Jaksic, Z. Kawabata, A. Kinzig, G. M. Mace, H. Mooney, A. H. Prieur-Richard, J. Tschirhart, and W. Weisser. 2011. Ecosystem services, targets, and indicators for the conservation and sustainable use of biodiversity. Frontiers in Ecology and the Environment 9:512-520.	Yes	Frontiers in Ecology and the Environment	Ecology	USA	One well-known service is the provision of food in the form of fish, and the relationship between harvested marine diversity and ecosystem services is well documented (Jackson et al. 2001; Worm et al. 2006)	Discussion	No	Arizona State University	No	0	9.113
480	Ecology	0-2	2009	No	2	Male	Europe	No	No	Yes	No	No	1	No	No	Yes	Petchey, O. L. and K. J. Gaston. 2009. Effects on ecosystem resilience of biodiversity, extinctions, and the structure of regional species pools. Theoretical Ecology 2:177-187.	Yes	Theoretical Ecology	Ecology	United Kingdom	In consequence [of a change in the abundance and composition of the species present in a local assemblage], the provision of ecosystem services to humanity may also change (Engelhardt and Ritchie 2001; Schroter et al. 2005; Srivastava et al. 2005; Worm et al. 2006)	Intro	No	University of Sheffield	No	0	1.545
481	Ecology	2-3	2009	No	9	Female	Europe	No	Yes	Yes	Yes	No	2	No	No	No	Pichegru, L., P. G. Ryan, C. Le Bohec, C. D. van der Lingen, R. Navarro, S. Petersen, S. Lewis, J. van der Westhuizen, and D. Gremillet. 2009. Overlap between vulnerable top predators and fisheries in the Benguela upwelling system: implications for marine protected areas. Marine Ecology-Progress Series 391:199-208.	Yes	Marine Ecology-Progress Series	Ecology	France	Industrial-scale fisheries have altered and degraded marine ecosystems (Botsford et al. 1997, Williams 1998, Worm et al. 2006) // Offshore MPAs [marine protected areas] for pelagic predators are needed to preserve ecosystem resilience and stability (Hyrenbach et al. 2000, Worm et al. 2006, Game et al. 2009)	Intro / Discussion	No	Institut pluridisciplinaire Hubert Curien	No	0	2.711
482	Conservation	3-5	2007	No	4	Female	Other	No	No	No	Yes	No	1	No	No	Yes	Pillans, S., J. C. Ortiz, R. D. Pillans, and H. P. Possingham. 2007. The impact of marine reserves on nekton diversity and community composition in subtropical eastern Australia. Biological Conservation 136:455-469.	Yes	Biological Conservation	Conservation	Australia	Biodiversity (i.e. species richness and diversity) within marine reserves is expected to increase due to the cessation of fishing compared to fished areas (McClanahan, 1994; Jennings et al., 1996; Wantiez et al., 1997; Halpern, 2003; Worm et al., 2006)	Discussion	No	CRC for Coastal Zone, Estuary and Waterway Management	No	0	4.115
483	Fisheries	2-3	2008	No	2	Male	Europe	No	No	No	Yes	No	1	No	No	No	Pinnegar, J. K. and G. H. Engelhard. 2008. The 'shifting baseline' phenomenon: a global perspective. Reviews in Fish Biology and Fisheries 18:1-16.	Yes	Reviews in Fish Biology and Fisheries	Fisheries	United Kingdom	As part of this, the establishment of no-take marine reserves is viewed as the first practical element of the marine restoration process (also by Worm et al. 2006)	Discussion	No	Lowestoft Laboratory	No	0	2.5
484	Multidisciplinary	>5	2011	Yes	4	Male	USA	No	No	No	No	No	2	No	No	No	Pinsky, M. L., O. P. Jensen, D. Ricard, and S. R. Palumbi. 2011. Unexpected patterns of fisheries collapse in the world's oceans. Proceedings of the National Academy of Sciences of the United States of America 108:8317-8322.	Yes	Proceedings of the National Academy of Sciences of the United States of America	Multidisciplinary	USA	For each definition, a stock was defined as collapsed when annual landings fell below 10% of a reference level for a specified window of time. The reference level was the maximum annual landings averaged over 1 or 5 y. Although 1 y has been used before (44) [...] As our time window, we used either 1 (44)	Methods	Yes	Stanford University	No	1	9.681
485	Conservation	3-5	2011	No	4	Female	Canada	Yes	Yes	Yes	No	No	1	No	No	No	Piroddi, C., G. Bearzi, J. Gonzalvo, and V. Christensen. 2011. From common to rare: The case of the Mediterranean common dolphin. Biological Conservation 144:2490-2498.	Yes	Biological Conservation	Conservation	Canada	Global fisheries have caused profound and significant ecological changes to the structure and the functioning of marine ecosystems by removing target and non-target species and by deteriorating marine habitats (Pauly et al., 1998; Jackson et al., 2001; Worm et al., 2006)	Intro	No	University of British Columbia	No	0	4.115
486	Other	0-2	2010	No	5	Female	Europe	Yes	Yes	Yes	No	No	1	No	Yes	No	Pita, C., H. Dickey, G. J. Pierce, E. Mente, and I. Theodossiou. 2010. Willingness for mobility amongst European fishermen. Journal of Rural Studies 26:308-319.	Yes	Journal of Rural Studies	Other	United Kingdom	The global trend of fisheries overexploitation and collapse (Caddy and Seijo, 2005; FAO, 2007; Pauly, 1995; Worm et al., 2006)	Intro	No	University of Aberdeen	No	0	1.634
487	Multidisciplinary	0-2	2012	No	4	Female	Other	No	No	Yes	No	No	1	No	No	No	Pitanga, M. E., M. J. F. Montes, K. M. Magalhaes, and T. N. V. Reis. 2012. Quantification and classification of the main environmental impacts on a Halodule wrightii seagrass meadow on a tropical island in northeastern Brazil. Anais Da Academia Brasileira De Ciencias 84:35-42.	Yes	Anais Da Academia Brasileira De Ciencias	Multidisciplinary	Brazil	The loss of seagrass habitats decreases primary production, carbon sequestration and cycling nutrients in the coastal zone (Worm 2006)	Intro	No	Universidade Federal de Pernambuco	No	0	1.094
488	Other	0-2	2008	No	1	Male	Canada	Yes	Yes	Yes	No	No	1	No	Yes	No	Pitcher, T. J. 2008. The sea ahead: challenges to marine biology from seafood sustainability. Hydrobiologia 606:161-185.	Yes	Hydrobiologia	Other	Canada	Although in the early 1990’s the majority of fisheries scientists would have reacted to news of a global crisis in fisheries with disbelief, today there is a general consensus about the disaster and depletion suffered by living organisms in the world’s oceans, as evidenced by a large number of published historical analyses (e.g. ecosystem integrity, Pauly & Christensen, 2002; Christensen, 1998; P…	Intro	No	University of British Columbia	No	0	1.784
489	Other	0-2	2009	No	15	Male	Europe	Yes	Yes	Yes	No	No	1	No	Yes	No	Plisnier, P. D., H. Mgana, I. Kimirei, A. Chande, L. Makasa, J. Chimanga, F. Zulu, C. Cocquyt, S. Horion, N. Bergamino, J. Naithani, E. Deleersnijder, L. Andre, J. P. Descy, and Y. Cornet. 2009. Limnological variability and pelagic fish abundance (Stolothrissa tanganicae and Lates stappersii) in Lake Tanganyika. Hydrobiologia 625:117-134.	Yes	Hydrobiologia	Other	Belgium	The accelerated loss in biodiversity in the world fish population points towards the urgent need for increased understanding of parameters controlling this resource (Jackson et al., 2001; Worm et al., 2006)	Intro	No	Royal Museum for Central Africa	No	0	1.784
490	Policy	0-2	2012	No	2	Female	Canada	No	No	No	Yes	No	1	No	No	Yes	Poh, T. M. and L. M. Fanning. 2012. Tackling illegal, unregulated, and unreported trade towards Humphead wrasse (Cheilinus undulatus) recovery in Sabah, Malaysia. Marine Policy 36:696-702.	Yes	Marine Policy	Policy	Canada	Furthermore, the expected improved biodiversity and ecosystem resilience that result from sustainable trade will positively affect the ability of coral reefs to withstand shocks of overexploitation and climate change [27]	Discussion	No	Dalhousie University	No	0	1.865
491	Multidisciplinary	3-5	2011	No	16	Male	Canada	No	No	Yes	No	No	1	No	Yes	No	Pohle, G., K. Iken, K. R. Clarke, T. Trott, B. Konar, J. J. Cruz-Motta, M. Wong, L. Benedetti-Cecchi, A. Mead, P. Miloslavich, N. Mieszkowska, R. Milne, L. Tamburello, A. Knowlton, E. Kimani, and Y. Shirayama. 2011. Aspects of Benthic Decapod Diversity and Distribution from Rocky Nearshore Habitat at Geographically Widely Dispersed Sites. Plos One 6.	Yes	PLoS One	Multidisciplinary	Canada	This includes the severe depletion of large fish populations [15–16]	Intro	No	Huntsman Marine Science Centre	No	0	4.092
492	Multidisciplinary	>5	2011	No	3	Female	Other	No	Yes	Yes	No	No	1	No	No	No	Pompa, S., P. R. Ehrlich, and G. Ceballos. 2011. Global distribution and conservation of marine mammals. Proceedings of the National Academy of Sciences of the United States of America 108:13600-13605.	Yes	Proceedings of the National Academy of Sciences of the United States of America	Multidisciplinary	Mexico	Despite their immense value, marine ecosystems are deteriorating rapidly, especially because of habitat degradation, overexploitation, introduction of exotic species, pollution (including noise), acidification, and climate disruption (4, 5)	Intro	No	Universidad Nacional Autónoma de México	No	0	9.681
493	Biology	2-3	2008	No	2	Male	USA	No	Yes	Yes	No	No	1	No	Yes	No	Pondella, D. J. and L. G. Allen. 2008. The decline and recovery of four predatory fishes from the Southern California Bight. Marine Biology 154:307-313.	Yes	Marine Biology	Biology	USA	Large Wshes, hallmarks of these ecosystems, are declining in abundance at a rapid rate and these declines may be especially problematic for long-lived species with low fecundity such as sharks (Baum et al. 2003; Worm et al. 2006; Myers et al. 2007)	Intro	No	Occidental College	No	0	2.276
494	Other	0-2	2007	No	3	Female	USA	No	No	Yes	No	No	1	Yes	Yes	No	Pornponi, S. A., D. G. Baden, and Y. Zohar. 2007. Marine biotechnology: Realizing the potential. Marine Technology Society Journal 41:24-31.	Yes	Marine Technology Society Journal	Other	USA	Human-driven erosion of marine biodiversity has recently been projected to lead to the collapse of all currently fished species by 2048 (Worm et al., 2006)	Intro	No	Florida Atlantic University	No	0	0.528
495	Ecology	>5	2008	No	4	Male	Canada	Yes	Yes	Yes	No	No	1	No	Yes	No	Post, J. R., L. Persson, E. A. Parkinson, and T. van Kooten. 2008. Angler numerical response across landscapes and the collapse of freshwater fisheries. Ecological Applications 18:1038-1049.	Yes	Ecological Applications	Ecology	Canada	We have witnessed the collapse of many of the world’s largest and most productive commercial fisheries over the last several decades (Hilborn et al. 2003, Pauly et al. 2003, Worm et al. 2006)	Intro	No	University of Calgary	No	0	5.102
496	Policy	0-2	2010	No	2	Male	USA	No	Yes	Yes	Yes	No	3	No	No	No	Powers, J. E. and M. H. Monk. 2010. Current and future use of indicators for ecosystem based fisheries management. Marine Policy 34:723-727.	Yes	Marine Policy	Policy	USA	A number of publications in the last decade have characterized changes in structure or function in oceanic regions, ecosystems, communities or fisheries [2–7] // In many cases the species weighting that is used is a measure of abundance or of catch by some or all gears in a fishery [2–9,12,22] // The measurement of attributes can be assignments of classification variables, such as trophic levels …	Intro / Discussion	No	Louisiana State University	No	0	1.865
497	Fisheries	0-2	2011	No	8	Male	Other	No	No	Yes	No	No	1	No	No	No	Pratchett, M. S., L. K. Bay, P. C. Gehrke, J. D. Koehn, K. Osborne, R. L. Pressey, H. P. A. Sweatman, and D. Wachenfeld. 2011. Contribution of climate change to degradation and loss of critical fish habitats in Australian marine and freshwater environments. Marine and Freshwater Research 62:1062-1081.	Yes	Marine and Freshwater Research	Fisheries	Australia	Vulnerability of aquatic habitats to climate change is further heightened by the degraded state of many aquatic habitats (e.g. Schindler 2001; Valiela et al. 2001; Hughes et al. 2003; Worm et al. 2006)	Intro	No	James Cook University	No	0	1.595
498	Other	3-5	2011	No	4	Male	Other	Yes	Yes	Yes	No	No	1	No	No	No	Pratchett, M. S., M. Trapon, M. L. Berumen, and K. Chong-Seng. 2011. Recent disturbances augment community shifts in coral assemblages in Moorea, French Polynesia. Coral Reefs 30:183-193.	Yes	Coral Reefs	Other	Australia	Disturbances have an important influence on the structure and dynamics of shallow marine environments (Hughes et al. 2003; Worm et al. 2006)	Intro	No	James Cook University	No	0	3.878
499	Other	3-5	2012	No	5	Male	Europe	Yes	Yes	Yes	No	No	1	No	No	Yes	Prowe, A. E. F., M. Pahlow, S. Dutkiewicz, M. Follows, and A. Oschlies. 2012. Top-down control of marine phytoplankton diversity in a global ecosystem model. Progress in Oceanography 101:1-13.	Yes	Progress in Oceanography	Oceanography	Germany	Evidence is increasing that biodiversity influences productivity and stability of ecosystems across trophic levels in both marine and terrestrial realms (Worm et al., 2006; Ptacnik et al., 2008)	Intro	No	University of Kiel	No	0	3.142
500	Ecology	2-3	2012	No	3	Male	Europe	No	Yes	Yes	Yes	No	3	No	No	Yes	Prowe, A. E. F., M. Pahlow, and A. Oschlies. 2012. Controls on the diversity-productivity relationship in a marine ecosystem model. Ecological Modelling 225:167-176.	Yes	Ecological Modelling	Ecology	Germany	In marine ecosystems, diversity loss could threaten the supply of goods and services of the ocean to humankind (Worm et al., 2006) // Previous studies addressing the relationship between marine biodiversity and ecosystem functioning have often focused on benthic communities or higher trophic levels (Stachowicz et al., 2007; Worm et al., 2006) // thus exacerbate the impact of diversity loss on eco…	Intro / Discussion	No	University of Kiel	No	0	2.326
501	Ecology	None	2010	No	3	Male	Europe	Yes	Yes	Yes	No	No	1	No	No	No	Ptacnik, R., S. D. Moorthi, and H. Hillebrand. 2010. Hutchinson Reversed, or Why There Need to Be So Many Species. Pages 1-43 in G. Woodward, editor. Integrative Ecology: From Molecules to Ecosystems.	Yes	Integrative Ecology: From Molecules to Ecosystems	Ecology	Germany	The increasing awareness of the accelerating loss of global biodiversity (Worm et al., 2006)	Intro	No	Carl von Ossietzky University	No	0	None
502	Multidisciplinary	>5	2008	No	8	Male	Europe	No	No	Yes	No	No	1	No	No	Yes	Ptacnik, R., A. G. Solimini, T. Andersen, T. Tamminen, P. Brettum, L. Lepisto, E. Willen, and S. Rekolainen. 2008. Diversity predicts stability and resource use efficiency in natural phytoplankton communities. Proceedings of the National Academy of Sciences of the United States of America 105:5134-5138.	Yes	Proceedings of the National Academy of Sciences of the United States of America	Multidisciplinary	Norway	Meanwhile, there is accumulating evidence that this positive effect [of diversity] on productivity exists across various habitats and trophic levels (5–7)	Intro	No	Norwegian Institute for Water Research	No	0	9.681
503	Ecology	2-3	2010	No	3	Female	Other	No	Yes	Yes	Yes	No	3	No	No	Yes	Quijas, S., B. Schmid, and P. Balvanera. 2010. Plant diversity enhances provision of ecosystem services: A new synthesis. Basic and Applied Ecology 11:582-593.	Yes	Basic and Applied Ecology	Ecology	Mexico	Recent syntheses have indeed shown many positive effects of biodiversity on ecosystem properties (e.g. plant aboveground and root biomass, biomass of marine plants and algae) related to the provision of ecosystem services (e.g. carbon storage, erosion control, regulation of water quality; Balvanera et al. 2006; Worm et al. 2006) // it intends to go beyond previous syntheses of biodiversity effect…	Intro / Discussion	No	Universidad Nacional Autónoma de México	No	0	2.669
504	Ecology	2-3	2008	No	2	Female	Europe	No	No	Yes	No	No	1	No	No	No	Raberg, S. and L. Kautsky. 2008. Grazer identity is crucial for facilitating growth of the perennial brown alga Fucus vesiculosus. Marine Ecology-Progress Series 361:111-118.	Yes	Marine Ecology-Progress Series	Ecology	Sweden	Concern about the loss of biodiversity in aquatic systems (e.g. Worm et al. 2006)	Intro	No	University of Stockholm	No	0	2.711
505	Ecology	3-5	2009	No	2	Male	USA	No	No	No	Yes	Yes	1	No	No	No	Ramirez, R. A. and W. E. Snyder. 2009. Scared sick? Predator-pathogen facilitation enhances exploitation of a shared resource. Ecology 90:2832-2839.	Yes	Ecology	Ecology	USA	the loss of predator species, which continues at an unprecedented rate (Duffy 2003, Worm et al. 2006)	Discussion	No	Washington State University	No	0	4.849
506	Policy	0-2	2012	No	2	Male	Canada	Yes	Yes	Yes	No	No	1	No	No	No	Rangeley, R. W. and R. W. D. Davies. 2012. Raising the "Sunken Billions": Financing the transition to sustainable fisheries. Marine Policy 36:1044-1046.	Yes	Marine Policy	Policy	Canada	The economic and social importance of healthy, functioning marine ecosystems are well understood [1]	Intro	No	WWF Canada	No	0	1.865
507	Conservation	0-2	2010	No	3	Male	Other	No	No	Yes	No	No	1	No	No	No	Rasalato, E., V. Maginnity, and J. M. Brunnschweiler. 2010. Using local ecological knowledge to identify shark river habitats in Fiji (South Pacific). Environmental Conservation 37:90-97.	Yes	Environmental Conservation	Conservation	Fiji	The alarming loss of ecosystems and biodiversity owing to increasing human population and associated pressures on the environment can have severe consequences (Jackson et al. 2001; Lotze et al. 2006; Worm et al. 2006; Myers et al. 2007)	Intro	No	University of the South Pacific	No	0	1.927
508	Biology	3-5	2010	No	8	Female	Canada	No	No	No	Yes	No	1	No	Yes	No	Raudsepp-Hearne, C., G. D. Peterson, M. Tengo, E. M. Bennett, T. Holland, K. Benessaiah, G. K. MacDonald, and L. Pfeifer. 2010. Untangling the Environmentalist's Paradox: Why Is Human Well-being Increasing as Ecosystem Services Degrade? Bioscience 60:576-589.	Yes	Bioscience	Biology	Canada	Marine fisheries around the world are substantially depleted (Worm et al. 2006)	Discussion	No	McGill University	No	0	4.621
509	Multidisciplinary	>5	2009	No	4	Female	Other	No	Yes	Yes	No	No	1	No	No	Yes	Raymundo, L. J., A. R. Halford, A. P. Maypa, and A. M. Kerr. 2009. Functionally diverse reef-fish communities ameliorate coral disease. Proceedings of the National Academy of Sciences of the United States of America 106:17067-17070.	Yes	Proceedings of the National Academy of Sciences of the United States of America	Multidisciplinary	Guam	Coral reefs remain under increasing threat from poor water quality, habitat degradation, and destructive fishing practices (1–3). These disturbances have abetted drastic shifts in […] reduced productivity (5)	Intro	No	University of Guam	No	0	9.681
510	Conservation	2-3	2010	No	1	Male	USA	No	Yes	Yes	No	No	1	No	No	Yes	Reed, D. H. 2010. Albatrosses, eagles and newts, Oh My!: exceptions to the prevailing paradigm concerning genetic diversity and population viability? Animal Conservation 13:448-457.	Yes	Animal Conservation	Conservation	USA	Greater amounts of within population genetic diversity have been shown to favorably impact the rate of ecosystem recovery after perturbation, be positively correlated with species diversity, increase the level of ecosystem services provided, and to increase primary productivity (e.g. Reusch et al., 2005; Vellend & Geber, 2005; Cleary et al., 2006; Johnson, Lajeunesse & Agrawal, 2006; Worm et al.,…	Intro	No	University of Louisville	No	0	2.931
511	Conservation	3-5	2009	No	3	Female	Europe	No	No	No	Yes	No	1	No	No	No	Regnier, C., B. Fontaine, and P. Bouchet. 2009. Not Knowing, Not Recording, Not Listing: Numerous Unnoticed Mollusk Extinctions. Conservation Biology 23:1214-1221.	Yes	Conservation Biology	Conservation	France	In papers on this issue, there is conflation of “biological extinction” (our focus here) and “commercial extinction” (Dulvy et al. 2004; Worm et al. 2006; Hilborn 2007)	Discussion	No	Mus´eum National d’Histoire naturelle	No	0	4.692
512	Fisheries	>5	2009	No	4	Male	Europe	No	Yes	Yes	No	No	2	No	Yes	No	Reiss, H., G. Hoarau, M. Dickey-Collas, and W. J. Wolff. 2009. Genetic population structure of marine fish: mismatch between biological and fisheries management units. Fish and Fisheries 10:361-395.	Yes	Fish and Fisheries	Fisheries	The Netherlands	The severe decline of many commercial fish stocks in the last decades, however, and the slow or even failed recovery of some overexploited stocks raise the question whether current management strategies are sufficient for a sustainable use of marine resources (e.g. Hutchings 2000; Myers and Worm 2003; Daw and Gray 2005; Worm et al. 2006) // Ignoring the congruence of spatial scales between popula…	Intro	No	University of Groningen	No	0	5.8
513	Conservation	3-5	2012	No	11	Female	Europe	No	Yes	Yes	Yes	No	4	No	No	Yes	Ressurreicao, A., J. Gibbons, M. Kaiser, T. P. Dentinho, T. Zarzycki, C. Bentley, M. Austen, D. Burdon, J. Atkins, R. S. Santos, and G. Edwards-Jones. 2012. Different cultures, different values: The role of cultural variation in public's WTP for marine species conservation. Biological Conservation 145:148-159.	Yes	Biological Conservation	Conservation	Portugal	Additionally, our understanding of the consequences of biodiversity loss on the provision of ecosystem services (e.g. food supply, water purification, climate regulation, erosion control) is limited (Bracken et al., 2008; Worm et al., 2006). // In contrast, ongoing erosion of marine biodiversity in Europe and worldwide is exceedingly well documented (Coll et al., 2010; Clausen and York, 2008; Mye…	Intro / Methods / Discussion	Yes	University of Azores	No	0	4.115
514	Fisheries	2-3	2011	No	2	Male	Canada	No	No	No	Yes	No	1	No	No	No	Rice, J. C. and S. M. Garcia. 2011. Fisheries, food security, climate change, and biodiversity: characteristics of the sector and perspectives on emerging issues. Ices Journal of Marine Science 68:1343-1353.	Yes	ICES Journal of Marine Science	Fisheries	Canada	In facing these choices, it might help to have a more dynamic idea of conservation related to ecosystem functions and services than on individual species, a change that is coming for several reasons (Worm et al., 2006; Higgason and Brown; 2009; Stram and Evans, 2009)	Discussion	No	Department of Fisheries and Oceans	No	0	2.007
515	Ecology	2-3	2010	No	17	Male	Europe	No	Yes	Yes	No	No	1	No	Yes	No	Righton, D. A., K. H. Andersen, F. Neat, V. Thorsteinsson, P. Steingrund, H. Svedang, K. Michalsen, H. H. Hinrichsen, V. Bendall, S. Neuenfeldt, P. Wright, P. Jonsson, G. Huse, J. van der Kooij, H. Mosegaard, K. Hussy, and J. Metcalfe. 2010. Thermal niche of Atlantic cod Gadus morhua: limits, tolerance and optima. Marine Ecology-Progress Series 420:1-13.	Yes	Marine Ecology-Progress Series	Ecology	United Kingdom	Similar to most commercial species, most cod stocks are now heavily over-exploited (Worm et al. 2006, ICES 2007, Pitcher et al. 2009)	Intro	No	Centre for Environment, Fisheries and Aquaculture Science	No	0	2.711
516	Other	0-2	2010	No	2	Female	Europe	No	No	No	Yes	No	2	No	Yes	No	Ritchie, H. and G. Ellis. 2010. 'A system that works for the sea'? Exploring Stakeholder Engagement in Marine Spatial Planning. Journal of Environmental Planning and Management 53:701-723.	Yes	Journal of Environmental Planning and Management	Other	United Kingdom	Those who frame the problem as essentially one of a deteriorating marine environment highlight the decline in fish stocks, increased levels of marine pollution, deterioration of marine ecosystems and reducing biodiversity, coupled with intensification and competition for marine space and uses (Gubbay 1995, Berry 2000, Laoffely 2000, Roberts and Hawkins 2000, Worm et al. 2006, Jackson 2008) // Dis…	Discussion	No	University of Ulster	No	0	1.107
517	Other	None	2008	No	2	Male	Other	No	No	No	Yes	Yes	1	No	Yes	No	Rivadeneira, M. M. and E. R. Carmona. 2008. A late pleistocene macrobenthic assemblage in Caleta Patillos, northern Chile: paleoecological and paleobiogeographical interpretations. Revista Geologica De Chile 35:163-173.	Yes	Revista Geologica De Chile	Other	Chile	Therefore, the loss of these ‘core’ species, and for extension the structure of the entire assemblage, may have occurred only in very recent times (e.g., a few decades or centuries ago), perhaps similar to that observed in other marine ecosystems (Jackson, 2001; Jackson et al., 2001; Pandolfi et al., 2003; Worm et al., 2006).	Discussion	No	Universidad Católica del Norte	No	0	None
518	Conservation	0-2	2010	No	3	Male	Other	No	Yes	Yes	Yes	No	5	No	Yes	Yes	Rivadeneira, M. M., C. M. Santoro, and P. A. Marquet. 2010. Reconstructing the history of human impacts on coastal biodiversity in Chile: constraints and opportunities. Aquatic Conservation-Marine and Freshwater Ecosystems 20:74-82.	Yes	Aquatic Conservation-Marine and Freshwater Ecosystems	Conservation	Chile	There is a growing body of evidence that shows that marine coastal ecosystems, once considered by many as relatively pristine environments, have suffered profound alterations, ranging from species to ecosystem levels, including reductions in population sizes, shifts in geographic ranges, and loss of diversity, biomass, and ecosystem functioning (Pauly et al., 1998, 2003; Jackson, 2001; Jackson et…	Intro / Discussion	No	Universidad Católica del Norte	No	0	1.929
519	Other	0-2	2009	No	1	Female	Europe	No	No	No	Yes	No	1	Yes	Yes	No	Rivera-Ferre, M. 2009. Can Export-Oriented Aquaculture in Developing Countries be Sustainable and Promote Sustainable Development? The Shrimp Case. Journal of Agricultural & Environmental Ethics 22:301-321.	Yes	Journal of Agricultural & Environmental Ethics	Other	Spain	According to Worm et al. (2006) if present pressure on fisheries stock continues due to overexploitation, world fisheries will be depleted by 2048, if not extinct	Discussion	No	Edifici V -Campus de la UAB	No	0	1.109
520	Other	2-3	2010	No	18	Female	Europe	No	No	No	Yes	No	1	No	No	No	Robinson, C., D. K. Steinberg, T. R. Anderson, J. Aristegui, C. A. Carlson, J. R. Frost, J. F. Ghiglione, S. Hernandez-Leon, G. A. Jackson, R. Koppelmann, B. Queguiner, O. Ragueneau, F. Rassoulzadegan, B. H. Robison, C. Tamburini, T. Tanaka, K. F. Wishner, and J. Zhang. 2010. Mesopelagic zone ecology and biogeochemistry - a synthesis. Deep-Sea Research Part Ii-Topical Studies in Oceanography 57:1…	Yes	Deep-Sea Research Part II-Topical Studies in Oceanography	Oceanography	United Kingdom	The removal of top predators from the oceanic food chain can have profound effects on pelagic ecosystems (Frank etal., 2005; Worm et al., 2005, 2006)	Discussion	No	University of East Anglia	No	0	2.277
521	Other	2-3	2010	No	6	Male	USA	No	No	No	Yes	Yes	1	No	No	Yes	Robinson, J. D., E. Diaz-Ferguson, M. F. Poelchau, S. Pennings, T. D. Bishop, and J. Wares. 2010. Multiscale Diversity in the Marshes of the Georgia Coastal Ecosystems LTER. Estuaries and Coasts 33:865-877.	Yes	Estuaries and Coasts	Other	USA	The interaction between local abundance of species and species diversity may have critical effects on the services these ecosystems can provide (Worm et al. 2006)	Discussion	No	University of Georgia	No	0	2.109
522	Conservation	3-5	2009	No	1	Male	USA	No	No	Yes	Yes	No	3	No	No	Yes	Robison, B. H. 2009. Conservation of Deep Pelagic Biodiversity. Conservation Biology 23:847-858.	Yes	Conservation Biology	Conservation	USA	The principal concern here should be the prospect of undetected mass extinctions, which threaten losses in ecosystem function, economic opportunity, and vital ecosystem services (Ehrlich &Wilson 1991; Worm et al. 2006) // Removing top predators from the oceanic food chain has already had a significant impact on pelagic ecosystems (Frank et al. 2005; Worm et al. 2005, 2006) // Expanding food produ…	Intro / Discussion	No	Monterey Bay Aquarium Research Institute	No	0	4.692
523	Multidisciplinary	3-5	2011	No	5	Female	Europe	No	Yes	Yes	No	No	1	No	No	Yes	Rocklin, D., J. A. Tomasini, J. M. Culioli, D. Pelletier, and D. Mouillot. 2011. Spearfishing Regulation Benefits Artisanal Fisheries: The ReGS Indicator and Its Application to a Multiple-Use Mediterranean Marine Protected Area. Plos One 6.	Yes	PLoS One	Multidisciplinary	France	Moreover, changes in exploited biological assemblages and biodiversity loss may […] alter the sustainability of goods and services provided by ecosystems to humanity [8–10]	Intro	No	Universite´ Montpellier	No	0	4.092
524	Conservation	2-3	2011	No	8	Male	Other	No	No	No	Yes	No	1	No	No	Yes	Rodriguez-Zaragoza, F. A., A. L. Cupul-Magana, C. M. Galvan-Villa, E. Rios-Jara, M. Ortiz, E. G. Robles-Jarero, E. Lopez-Uriarte, and J. E. Arias-Gonzalez. 2011. Additive partitioning of reef fish diversity variation: a promising marine biodiversity management tool. Biodiversity and Conservation 20:1655-1675.	Yes	Biodiversity and Conservation	Conservation	Mexico	Biodiversity […] loss affects ecosystem functioning and the goods and services provided (Worm et al. 2006)	Discussion	No	Universidad de Guadalajara	No	0	2.238
525	Biology	3-5	2009	No	3	Male	USA	No	No	No	Yes	Yes	1	No	No	Yes	Roemer, G. W., M. E. Gompper, and B. Van Valkenburgh. 2009. The Ecological Role of the Mammalian Mesocarnivore. Bioscience 59:165-173.	Yes	Bioscience	Biology	USA	Diverse apex predator guilds are characterized by strong interactions (competition, kleptoparasitism, IGP) among species that very likely limit the dominance of any single species, resulting in more diffuse effects on mesocarnivores, and overall resilience and stability within the predator community (e.g., see Worm et al. 2006)	Conclusions	No	New Mexico State University	No	0	4.621
526	Conservation	0-2	2011	No	3	Female	USA	No	No	No	Yes	Yes	1	No	No	Yes	Rogers-Bennett, L., B. L. Allen, and D. P. Rothaus. 2011. Status and habitat associations of the threatened northern abalone: importance of kelp and coralline algae. Aquatic Conservation-Marine and Freshwater Ecosystems 21:573-581.	Yes	Aquatic Conservation-Marine and Freshwater Ecosystems	Conservation	USA	There is now a growing body of evidence for marine systems that species-diverse ecosystems have a positive effect on ecosystem function including enhanced fishery yields and greater resilience to perturbations (Tegner and Dayton, 2000; Worm et al., 2006)	Discussion	No	University of California, Davis	No	0	1.929
527	Other	2-3	2011	No	3	Female	USA	Yes	Yes	Yes	No	No	1	No	No	No	Rollwagen-Bollens, G., S. Gifford, and S. M. Bollens. 2011. The Role of Protistan Microzooplankton in the Upper San Francisco Estuary Planktonic Food Web: Source or Sink? Estuaries and Coasts 34:1026-1038.	Yes	Estuaries and Coasts	Other	USA	A serious problem facing coastal and estuarine systems worldwide is the increasing loss of abundance and biodiversity of aquatic species, particularly fishes (Lotze et al. 2006; Worm et al. 2006)	Intro	No	Washington State University	No	0	2.109
528	Other	3-5	2010	No	6	Female	Europe	No	No	No	Yes	Yes	1	No	No	No	Rombouts, I., G. Beaugrand, F. Ibanez, S. Gasparini, S. Chiba, and L. Legendre. 2010. A multivariate approach to large-scale variation in marine planktonic copepod diversity and its environmental correlates. Limnology and Oceanography 55:2219-2229.	Yes	Limnology and Oceanography	Oceanography	France	These changing environmental conditions will affect the patterns of marine biodiversity mostly through changes in distributions of taxa as a result of shifts in latitudinal ranges (Beaugrand et al. 2002; Worm et al. 2006)	Discussion	No	Universite´ Pierre et Marie Curie	No	0	3.416
529	Biology	2-3	2007	No	6	Male	Europe	No	No	Yes	Yes	No	4	No	No	Yes	Ronnback, P., N. Kautsky, L. Pihl, M. Troell, T. Soerqvist, and H. Wennhage. 2007. Ecosystem goods and services from Swedish coastal habitats: Identification, valuation, and implications of ecosystem shifts. Ambio 36:534-544.	Yes	Ambio	Biology	Sweden	Research should also address the uncertainty oncerning the functions and complexity necessary for sustaining the flow of goods and services from ecosystems, i.e., the key role of biodiversity at different scales (10, 11) // A general conclusion is that high marine biodiversity increases stability and recovery potential of ecosystems (11) // Increased species diversity improves the efficiency of e…	Intro / Discussion	No	Stockholm University	No	0	2.025
530	Ecology	>5	2008	No	3	Male	Canada	No	No	No	Yes	No	1	No	No	No	Rooney, N., K. S. McCann, and J. C. Moore. 2008. A landscape theory for food web architecture. Ecology Letters 11:867-881.	Yes	Ecology Letters	Ecology	Canada	There has been documented losses in diversity, stability and function accompanying such changes (Jackson et al. 2001; Terborgh et al. 2001; Worm et al. 2006)	Discussion	No	University of Guelph	No	0	17.557
531	Other	2-3	2007	No	3	Male	USA	Yes	Yes	Yes	No	No	2	No	Yes	No	Rooper, C. N., J. L. Boldt, and M. Zimmermann. 2007. An assessment of juvenile Pacific Ocean perch (Sebastes alutus) habitat use in a deepwater nursery. Estuarine Coastal and Shelf Science 75:371-380.	Yes	Estuarine Coastal and Shelf Science	Other	USA	Conservation of fish species of economic and ecological significance is an issue of increasing importance in marine ecosystems, given large-scale declines in fish populations (Pauly et al., 1998; Myers and Worm, 2003; Worm et al., 2006) // Alternative management strategies such as designation of marine reserves have been widely suggested as options that could protect fish stocks both by mitigatin…	Intro	No	Alaska Fisheries Science Center, NMFS, NOAA	No	0	2.247
532	Ecology	3-5	2009	No	3	Female	Europe	Yes	Yes	Yes	No	No	1	No	No	Yes	Rossi, F., M. Vos, and J. J. Middelburg. 2009. Species identity, diversity and microbial carbon flow in reassembling macrobenthic communities. Oikos 118:503-512.	Yes	Oikos	Ecology	The Netherlands	Numerous theoretical and experimental studies have shown that biodiversity can have a positive effect on ecosystem properties, goods and services (Grime 1997, Tilman et al. 1997, Loreau et al. 2001, Worm et al. 2006) and ensure stability of ecosystem functioning	Intro	No	Netherlands Inst. of Ecology	No	0	3.061
533	Multidisciplinary	>5	2008	No	8	Male	Europe	No	No	No	Yes	No	1	No	No	No	Rouyer, T., J. M. Fromentin, F. Menard, B. Calzelles, K. Briand, R. Pianet, B. Planque, and N. C. Stenseth. 2008. Complex interplays among population dynamics, environmental forcing, and exploitation in fisheries. Proceedings of the National Academy of Sciences of the United States of America 105:5420-5425.	Yes	Proceedings of the National Academy of Sciences of the United States of America	Multidisciplinary	France	Hence, identifying origins of fluctuations in fisheries data is still a key issue in the fisheries community [...], but also in the whole scientific community, because CPUE are used to depict fish abundance and diversity in ecological studies (e.g., ref. 38)	Discussion	No	Institut Franc¸ais de Recherche pour l’Exploitation de la Mer	No	0	9.681
534	Conservation	3-5	2008	No	6	Female	USA	No	Yes	Yes	No	No	1	No	Yes	No	Rowell, K., K. W. Flessa, D. L. Dettman, M. J. Roman, L. R. Gerber, and L. T. Findley. 2008. Diverting the Colorado River Reads to a dramatic life history shift in an endangered marine fish. Biological Conservation 141:1138-1148.	Yes	Biological Conservation	Conservation	USA	and it is widely accepted that most marine fisheries are already in decline (Worm et al., 2006)	Intro	No	University of Arizona	No	0	4.115
535	Other	2-3	2011	No	4	Male	Europe	No	Yes	Yes	No	No	1	No	No	Yes	Rubal, M., P. Veiga, R. Vieira, and I. Sousa-Pinto. 2011. Seasonal patterns of tidepool macroalgal assemblages in the North of Portugal. Consistence between species and functional group approaches. Journal of Sea Research 66:187-194.	Yes	Journal of Sea Research	Other	Portugal	Recent studies have linked the biodiversity with the ecosystem function, resilience and the services provided by aquatic ecosystems (Cardinale, 2011; Palumbi et al., 2009; Worm et al., 2006)	Intro	No	University of Porto	No	0	2.598
536	Other	2-3	2009	No	5	Female	Europe	Yes	Yes	Yes	No	No	1	No	Yes	No	Ruckert, S., S. Klimpel, S. Al-Quraishy, H. Mehlhorn, and H. W. Palm. 2009. Transmission of fish parasites into grouper mariculture (Serranidae: Epinephelus coioides (Hamilton, 1822)) in Lampung Bay, Indonesia. Parasitology Research 104:523-532.	Yes	Parasitology Research	Other	Germany	With the decline of natural fish stocks, aquaculture has been an expanding business worldwide (Worm et al. 2006; FAO 2007; Nowak 2007)	Intro	No	Heinrich-Heine-University Düsseldorf	No	0	2.149
537	Ecology	>5	2011	No	2	Male	Other	No	Yes	Yes	Yes	Yes	2	No	No	Yes	Russ, G. R. and A. C. Alcala. 2011. Enhanced biodiversity beyond marine reserve boundaries: The cup spillith over. Ecological Applications 21:241-250.	Yes	Ecological Applications	Ecology	Australia	The worldwide depletion of predatory fish is a well documented example of such degradation […] resulting in [...] loss of important biodiversity and ecosystem services (Worm et al. 2006) // In the present study, we have documented spillover of species richness of large predatory fish, often considered to be good proxies for healthy marine ecosystems (Worm et al. 2006, Myers et al. 2007)	Intro / Discussion	No	James Cook University	No	0	5.102
538	Other	0-2	2008	No	2	Male	Other	No	No	No	Yes	No	1	No	Yes	No	Russell, G. and S. Ferrie. 2008. Health and environmental implications of the CSIRO Total Wellbeing Diet. Nutrition & Dietetics 65:139-143.	Yes	Nutrition & Dietetics	Other	Australia	In 2003, the catch of 23% of commercially important species had fallen to 10% of their historical maximums [22]	Discussion	No	Animal Liberation Inc	No	0	0.875
539	Fisheries	>5	2008	No	2	Female	Other	No	No	No	Yes	No	3	No	No	Yes	Saenz-Arroyo, A. and C. M. Roberts. 2008. Consilience in fisheries science. Fish and Fisheries 9:316-327.	Yes	Fish and Fisheries	Fisheries	Mexico	human influences on marine food webs and ecosystem structure extend wider than previously thought (Pauly et al. 1998; Worm et al. 2006; Myers et al. 2007) // and the wide range of ecosystem services and benefits society receives from nature (Daily 1997, 2000; Worm et al. 2006) // The rapid evolution of ecological economics, a discipline that analyses human economies in the context of their depend…	Discussion	No	Comunidad y Biodiversidad A.C.	No	0	5.8
540	Other	0-2	2011	No	11	Female	Canada	No	No	Yes	No	No	1	No	No	No	Salomon, A. K., S. K. Gaichas, O. P. Jensen, V. N. Agostini, N. A. Sloan, J. Rice, T. R. McClanahan, M. H. Ruckelshaus, P. S. Levin, N. K. Dulvy, and E. A. Babcock. 2011. BRIDGING THE DIVIDE BETWEEN FISHERIES AND MARINE CONSERVATION SCIENCE. Bulletin of Marine Science 87:251-274.	Yes	Bulletin of Marine Science	Other	Canada	Fisheries and marine conservation science have different histories, epistemologies, cultures, and priorities, leading sometimes to strikingly divergent views on the state of fisheries and marine ecosystems, and on how to achieve sustainability (Ludwig et al. 1993, Rosenberg et al. 1993, Myers and Worm 2003, Walters 2003, Hilborn 2006, Worm et al. 2006)	Intro	No	Simon Fraser University	No	0	1.148
541	Conservation	3-5	2012	No	2	Male	USA	No	Yes	Yes	No	No	1	No	No	Yes	Samhouri, J. F. and P. S. Levin. 2012. Linking land- and sea-based activities to risk in coastal ecosystems. Biological Conservation 145:118-129.	Yes	Biological Conservation	Conservation	USA	Unabated, current ocean practices will prevent marine ecosystems from continuing to provide the many benefits people desire—like food, energy, coastal protection, and climate regulation (MEA, 2005; Worm et al., 2006; Airoldi and Beck, 2007; Halpern et al., 2008)	Intro	No	Northwest Fisheries Science Center, NMFS, NOAA	No	0	4.115
542	Other	3-5	2009	No	3	Male	USA	No	No	No	Yes	No	1	No	No	No	Samhouri, J. F., P. S. Levin, and C. J. Harvey. 2009. Quantitative Evaluation of Marine Ecosystem Indicator Performance Using Food Web Models. Ecosystems 12:1283-1298.	Yes	Ecosystems	Other	USA	In other contexts, however […] total catch (Worm and others 2006) is cited as reliable indicators of marine ecosystem status	Discussion	No	Northwest Fisheries Science Center, NMFS, NOAA	No	0	3.495
543	Multidisciplinary	3-5	2008	Yes	19	Male	USA	No	No	No	Yes	No	1	No	Yes	No	Sandin, S. A., J. E. Smith, E. E. DeMartini, E. A. Dinsdale, S. D. Donner, A. M. Friedlander, T. Konotchick, M. Malay, J. E. Maragos, D. Obura, O. Pantos, G. Paulay, M. Richie, F. Rohwer, R. E. Schroeder, S. Walsh, J. B. C. Jackson, N. Knowlton, and E. Sala. 2008. Baselines and Degradation of Coral Reefs in the Northern Line Islands. Plos One 3.	Yes	PLoS One	Multidisciplinary	USA	Thus, the low fish biomass at these atolls most likely is due to fishing here, as in many places elsewhere [39,63,64]	Discussion	No	Scripps Institution of Oceanography	No	2	4.092
544	Other	2-3	2011	No	10	Male	Other	No	No	No	Yes	Yes	2	No	No	No	Santos, R. G., A. S. Martins, J. D. Farias, P. A. Horta, H. T. Pinheiro, E. Torezani, C. Baptistotte, J. A. Seminoff, G. H. Balazs, and T. M. Work. 2011. Coastal habitat degradation and green sea turtle diets in Southeastern Brazil. Marine Pollution Bulletin 62:1297-1302.	Yes	Marine Pollution Bulletin	Other	Brazil	Restricted diets may adversely affect turtles because different food items are required to optimize different process of the life cycle such as growth, survival, and fecundity (Worm et al., 2006) // Based on our findings and given the high degradation rates of coastal ecosystems, we recommend that conservation programs for green turtles focus not only on the turtles, but also on the entirety of c…	Discussion	No	Universidade Federal do Espírito Santo	No	0	2.503
545	Ecology	0-2	2008	No	4	Male	Europe	No	No	No	Yes	Yes	1	No	No	No	Sara, G., C. Romano, J. Widdows, and F. J. Staff. 2008. Effect of salinity and temperature on feeding physiology and scope for growth of an invasive species (Brachidontes pharaonis - MOLLUSCA : BIVALVIA) within the Mediterranean sea. Journal of Experimental Marine Biology and Ecology 363:130-136.	Yes	Journal of Experimental Marine Biology and Ecology	Ecology	Italy	For example, salinity, temperature, storms and wave activity during high tides, and local irradiance, elevated air temperatures and precipitation at low tides, are detrimental for native species and intertidal biodiversity (sensu Helmuth, 1999; Helmuth et al., 2002; Worm et al., 2006)	Discussion	No	Università di Palermo	No	0	1.875
546	Biology	0-2	2009	No	2	Male	Other	No	No	No	Yes	Yes	1	No	No	Yes	Sato, M. and H. Sattmann. 2009. Extirpation of Hediste japonica (Izuka, 1908) (Nereididae, Polychaeta) in Central Japan, Evidenced by a Museum Historical Collection. Zoological Science 26:369-372.	Yes	Zoological Science	Biology	Japan	Regional species richness, which probably enhances the productivity and stability of local ecosystems (Worm et al., 2006)	Discussion	No	Kagoshima University	No	0	0.952
547	Other	0-2	2010	No	6	Male	Other	No	Yes	Yes	No	No	1	No	No	Yes	Satyanarayana, B., I. F. Idris, K. A. Mohamad, M. L. Husain, N. A. M. Shazili, and F. Dahdouh-Guebas. 2010. Mangrove species distribution and abundance in relation to local environmental settings: a case-study at Tumpat, Kelantan Delta, east coast of peninsular Malaysia. Botanica Marina 53:79-88.	Yes	Botanica Marina	Other	Malaysia	Regional species richness, which probably enhances the productivity and stability of local ecosystems (Worm et al., 2006)	Intro	No	University Malaysia Terengganu	No	0	1.493
548	Biology	0-2	2008	No	2	Male	Canada	Yes	Yes	Yes	No	No	1	No	No	No	Scheibling, R. E. and A. Metaxas. 2008. Abundance, spatial distribution, and size structure of the sea star Protoreaster nodosus in Palau, with notes on feeding and reproduction. Bulletin of Marine Science 82:221-235.	Yes	Bulletin of Marine Science	Biology	Canada	Increasing concern about human impacts on marine ecosystems has prompted research to assess biodiversity at local to global scales, and to better understand the ecological role of various species and functional groups that comprise these systems (Gray, 1997; Solan et al., 2004; Worm et al., 2006)	Intro	No	Dalhousie University	No	0	1.148
549	Ecology	0-2	2011	No	2	Male	Other	Yes	Yes	Yes	No	No	1	No	No	No	Schiel, D. R. and S. A. Lilley. 2011. Impacts and negative feedbacks in community recovery over eight years following removal of habitat-forming macroalgae. Journal of Experimental Marine Biology and Ecology 407:108-115.	Yes	Journal of Experimental Marine Biology and Ecology	Ecology	New Zealand	The loss or decline of coastal marine species through a wide range of diffuse and local impacts constitutes a key component in the global biodiversity crisis (Novacek and Cleland, 2001; Worm et al., 2006; Airoldi and Beck, 2007; Pereira et al., 2010)	Intro	No	University of Canterbury	No	0	1.875
550	Biology	2-3	2010	No	4	Female	Other	Yes	Yes	Yes	No	No	1	No	No	No	Schluessel, V., D. Broderick, S. P. Collin, and J. R. Ovenden. 2010. Evidence for extensive population structure in the white-spotted eagle ray within the Indo-Pacific inferred from mitochondrial gene sequences. Journal of Zoology 281:46-55.	Yes	Journal of Zoology	Biology	Australia	Global marine fisheries catches have decreased by 13% since reaching a peak in 1994, despite significant increases in fishing effort (Worm et al., 2006)	Intro	No	University of Queensland	No	0	2.043
551	Ecology	2-3	2011	Yes	4	Female	Canada	No	No	Yes	Yes	No	2	No	No	Yes	Schmidt, A. L., M. Coll, T. N. Romanuk, and H. K. Lotze. 2011. Ecosystem structure and services in eelgrass Zostera marina and rockweed Ascophyllum nodosum habitats. Marine Ecology-Progress Series 437:51-68.	Yes	Marine Ecology-Progress Series	Ecology	Canada	Because biodiversity is essential for ecosystem functioning and services (Millennium Ecosystem Assessment 2005b, Worm et al. 2006) // In addition, the strong response of eelgrass, and particularly rockweed, to the simulated loss of primary producers warrants further investigation, especially since regional losses of nearshore vegetation have been shown to strongly reduce the filtering and nursery…	Intro / Discussion	No	Dalhousie University	No	1	2.711
552	Other	3-5	2011	No	4	Male	Other	Yes	Yes	Yes	No	No	1	No	No	No	Schneider, K., Y. Sher, J. Erez, and J. van Rijn. 2011. Carbon cycling in a zero-discharge mariculture system. Water Research 45:2375-2382.	Yes	Water Research	Other	Israel	The oceans supply of fish is stagnant and it is expected to decrease in the near future due to overfishing and biodiversity loss (Jackson et al., 2001; Worm et al., 2006)	Intro	No	The Hebrew University of Jerusalem	No	0	4.865
553	Other	0-2	2008	No	2	Male	Europe	No	No	No	Yes	No	1	No	No	Yes	Schwaninger, M. and J. P. Rios. 2008. System dynamics and cybernetics: a synergetic pair. System Dynamics Review 24:145-174.	Yes	System Dynamics Review	Other	Switzerland	Diversity is essential for the survival of an organization: this holds for […] biological systems (Worm et al., 2006)	Discussion	No	University of St. Gallen	No	0	0.867
554	Other	0-2	2010	No	1	Male	USA	No	No	No	Yes	No	3	Yes	Yes	Yes	Schwartz, S. A. 2010. Healing the Seas - Acknowledging the Impact of Humans on the World Ocean. Explore-the Journal of Science and Healing 6:349-351.	Yes	Explore-the Journal of Science and Healing	Other	USA	That same year, in November, Canadian marine biologist Boris Worm, at Dalhousie University, Halifax, published a study on global fisheries in Science that stunned the fisheries industry. [4] // The abstract says its all: Human-dominated marine ecosystems are experiencing accelerating loss of populations and species, with largely unknown consequences. We analyzed local experiments, longterm region…	Discussion	No	Samueli Institute	No	0	1.027
555	Ecology	2-3	2007	No	2	Male	Canada	Yes	Yes	Yes	No	No	1	No	No	Yes	Scrosati, R. and C. Heaven. 2007. Spatial trends in community richness, diversity, and evenness across rocky intertidal environmental stress gradients in eastern Canada. Marine Ecology-Progress Series 342:1-14.	Yes	Marine Ecology-Progress Series	Ecology	Canada	Species diversity is one of the most important traits of a community, because diversity is related to productivity, stability, and susceptibility to invasion (Hooper et al. 2005, Worm et al. 2006)	Intro	No	Saint Francis Xavier University	No	0	2.711
556	Multidisciplinary	3-5	2010	No	3	Male	USA	No	Yes	Yes	No	No	1	No	No	No	Semmens, B. X., P. J. Auster, and M. J. Paddack. 2010. Using Ecological Null Models to Assess the Potential for Marine Protected Area Networks to Protect Biodiversity. Plos One 5.	Yes	PLoS One	Multidisciplinary	USA	Evidence of increasing threats and drastic declines in marine ecosystems is mounting [3,4,5,6]	Intro	No	Northwest Fisheries Science Center, NMFS, NOAA	No	0	4.092
557	Other	2-3	2008	No	8	Female	Europe	No	No	Yes	No	No	1	No	No	No	Sequeira, A., J. G. Ferreira, A. J. S. Hawkins, A. Nobre, P. Lourenco, X. L. Zhang, X. Yan, and T. Nickell. 2008. Trade-offs between shellfish aquaculture and benthic biodiversity: A modelling approach for sustainable management. Aquaculture 274:313-328.	Yes	Aquaculture	Other	Portugal	The latter [wild bivalve species] are important for many reasons, including preservation of biodiversity (e.g. Worm et al., 2006)	Intro	No	Centre for Ocean and Environment	No	0	2.041
558	Ecology	>5	2012	No	4	Female	Canada	No	Yes	Yes	Yes	No	2	No	No	Yes	Shackell, N. L., J. A. D. Fisher, K. T. Frank, and P. Lawton. 2012. Spatial scale of similarity as an indicator of metacommunity stability in exploited marine systems. Ecological Applications 22:336-348.	Yes	Ecological Applications	Ecology	Canada	Over the last two decades, the global loss of biodiversity has generated interest in the relationship between biodiversity and ecosystem processes, including productivity rates, biomass accumulation, trophic balance, and stability (Giller et al. 2004, Worm et al. 2006, Gamfeldt and Hillebrand 2008, Reiss et al. 2009). // Species richness per se is often considered to be an important component of …	Intro / Discussion	No	Fisheries and Oceans Canada	No	0	5.102
559	Other	2-3	2009	No	2	Female	USA	No	No	Yes	No	No	1	No	No	Yes	Sherman, A. D. and K. L. Smith. 2009. Deep-sea benthic boundary layer communities and food supply: A long-term monitoring strategy. Deep-Sea Research Part Ii-Topical Studies in Oceanography 56:1754-1762.	Yes	Deep-Sea Research Part II-Topical Studies in Oceanography	Oceanography	USA	Biodiversity enhances ecosystem stability in the ocean but can be very susceptible to stresses related to climate change (e.g., Worm etal., 2006)	Intro	No	Monterey Bay Aquarium Research Institute	No	0	2.277
560	Fisheries	2-3	2007	No	2	Male	USA	No	No	No	Yes	No	3	No	No	Yes	Sherman, K. and A. Duda. 2007. A global approach for recovery and sustainability of fisheries in large marine ecosystems. Fisheries 32:354-357.	Yes	Fisheries	Fisheries	USA	The recent study by Worm et al. (2006) reached the conclusion that cumulative catches within the world's LMEs have declined 13% (10.6 million metric tons) since passing a cumulative maximum in 1994. // They argue that species average catches in non-collapsed fisheries were higher in species rich systems and, that species robustness to overexploitation was enhanced in LMEs with high fish species d…	Discussion	No	Northeast Fisheries Science Center, NMFS, NOAA	No	0	2.367
561	Multidisciplinary	>5	2007	No	4	Male	USA	No	No	No	Yes	Yes	1	No	Yes	No	Sibert, J., J. Hampton, P. Kleiber, and M. Maunder. 2007. Fishing for good news - Response. Science 316:201-201.	Yes	Science	Multidisciplinary	USA	Our purpose was to show that the interactions between fisheries and the pelagic ecosystem are complex and not easily summarized in flashy, often exaggerated, headlines (6) proclaiming the collapse of ocean ecosystems and the end of fishing	Discussion	No	University of Hawaii	No	0	32.452
562	Ecology	2-3	2010	No	3	Male	Other	No	No	No	Yes	No	1	No	No	No	Siche, R., F. Agostinho, and E. Ortega. 2010. Emergy Net Primary Production (ENPP) as basis for calculation of Ecological Footprint. Ecological Indicators 10:475-483.	Yes	Ecological Indicators	Ecology	Peru	There are several studies on Peruvian sustainability and worldwide fishing (Pasco-Font, 1999; Talberth et al., 2006; OCEANA, 2006; Worm et al., 2006)	Discussion	No	Universidad, Nacional de Trujillo	No	0	2.695
563	Ecology	0-2	2011	No	4	Female	Europe	Yes	Yes	Yes	No	No	1	No	No	No	Sieben, K., L. Ljunggren, U. Bergstrom, and B. K. Eriksson. 2011. A meso-predator release of stickleback promotes recruitment of macroalgae in the Baltic Sea. Journal of Experimental Marine Biology and Ecology 397:79-84.	Yes	Journal of Experimental Marine Biology and Ecology	Ecology	The Netherlands	Anthropogenic impacts have changed the structure of aquatic ecosystems on a global scale (Lotze et al., 2006; Worm et al., 2006)	Intro	No	University of Groningen	No	0	1.875
564	Multidisciplinary	3-5	2011	No	8	Male	USA	No	Yes	Yes	No	No	1	No	No	Yes	Silliman, B. R., M. D. Bertness, A. H. Altieri, J. N. Griffin, M. C. Bazterrica, F. J. Hidalgo, C. M. Crain, and M. V. Reyna. 2011. Whole-Community Facilitation Regulates Biodiversity on Patagonian Rocky Shores. Plos One 6.	Yes	PLoS One	Multidisciplinary	USA	Climate change, habitat destruction, over-harvesting, pollution, and species introductions are leading anthropogenic forces driving declines in species populations, diversity and ecosystem services [1,5–8]	Intro	No	University of Florida	No	0	4.092
565	Other	0-2	2011	No	4	Male	Europe	No	No	Yes	No	No	1	No	No	No	Singh, C. R., J. R. Thompson, D. G. Kingston, and J. R. French. 2011. Modelling water-level options for ecosystem services and assessment of climate change: Loktak Lake, northeast India. Hydrological Sciences Journal-Journal Des Sciences Hydrologiques 56:1518-1542.	Yes	Hydrological Sciences Journal-Journal Des Sciences Hydrologiques	Other	United Kingdom	Increases in human populations and economic development are significant factors driving wetland degradation as demands for food, water and land increase (Valiela et al. 2001, UNEP 2006, Worm et al. 2006, Kareiva et al. 2007)	Intro	No	University College London	No	0	1.541
566	Conservation	0-2	2009	No	2	Male	Canada	No	No	No	Yes	No	1	No	No	Yes	Sloan, N. A. and P. M. Bartier. 2009. Historic marine invertebrate species inventory: case study of a science baseline towards establishing a marine conservation area. Aquatic Conservation-Marine and Freshwater Ecosystems 19:827-837.	Yes	Aquatic Conservation-Marine and Freshwater Ecosystems	Conservation	Canada	and there is broad consensus that biodiversity is integral to ecosystem properties and services (Hooper et al., 2005; Worm et al., 2006; CoML, 2007)	Discussion	No	Parks Canada Agency	No	0	1.929
567	Other	3-5	2010	No	1	Male	Other	No	Yes	Yes	No	No	1	No	No	Yes	Smale, D. A. 2010. Monitoring marine macroalgae: the influence of spatial scale on the usefulness of biodiversity surrogates. Diversity and Distributions 16:985-995.	Yes	Diversity and Distributions	Other	Australia	It has been argued that maintenance of marine biodiversity should be the principal objective of ecosystem-based management (EBM), as biodiversity is inherently linked to ecosystem functioning and resilience, and myriad ecosystem services (Worm et al., 2006; Palumbi et al., 2009)	Intro	No	University of Western Australia	No	0	4.83
568	Fisheries	2-3	2011	No	5	Male	Other	No	No	Yes	Yes	No	5	No	Yes	Yes	Smale, D. A., T. J. Langlois, G. A. Kendrick, J. J. Meeuwig, and E. S. Harvey. 2011. From fronds to fish: the use of indicators for ecological monitoring in marine benthic ecosystems, with case studies from temperate Western Australia. Reviews in Fish Biology and Fisheries 21:311-337.	Yes	Reviews in Fish Biology and Fisheries	Fisheries	Australia	It is also important to note that various scales of temporal and spatial variation exist in the anthropogenic (Hauser et al. 2002; Worm et al. 2006) // Therefore, current levels of biodiversity and taxonomic richness should be conserved to minimise impacts on commercial fisheries and progress towards sustainable extraction of resources (Worm et al. 2006; Cheung et al. 2008) // Marine biodiversity…	Intro / Discussion	No	University of Western Australia	No	0	2.5
569	Fisheries	0-2	2009	No	6	Male	Other	Yes	Yes	Yes	No	No	1	No	Yes	No	Smith, D., A. Punt, N. Dowling, A. Smith, G. Tuck, and I. Knuckey. 2009. Reconciling Approaches to the Assessment and Management of Data-Poor Species and Fisheries with Australia's Harvest Strategy Policy. Marine and Coastal Fisheries 1:244-254.	Yes	Marine and Coastal Fisheries	Fisheries	Australia	Recently, a number of high-profile publications (Pauly et al. 1998; Myers and Worm 2003; Worm et al. 2006) have painted a bleak picture of the status of the world’s fisheries	Intro	No	CSIRO Wealth from Oceans National Research Flagship	No	0	1.065
570	Multidisciplinary	>5	2010	No	4	Male	USA	Yes	Yes	Yes	No	No	1	No	No	No	Smith, M. D., J. Lynham, J. N. Sanchirico, and J. A. Wilson. 2010. Political economy of marine reserves: Understanding the role of opportunity costs. Proceedings of the National Academy of Sciences of the United States of America 107:18300-18305.	Yes	Proceedings of the National Academy of Sciences of the United States of America	Multidisciplinary	USA	Many scientists and marine conservationists are calling for increases in the number of no-take marine reserves throughout the world’s oceans (1, 2)	Intro	No	Duke University	No	0	9.681
571	Biology	0-2	2008	No	4	Male	Europe	No	No	Yes	No	No	1	No	No	No	Solan, M., P. Batty, M. T. Bulling, and J. A. Godbold. 2008. How biodiversity affects ecosystem processes: implications for ecological revolutions and benthic ecosystem function. Aquatic Biology 2:289-301.	Yes	Aquatic Biology	Biology	United Kingdom	In recent years, spurred by the anticipation that anthropogenic forcing (Worm et al. 2006, Halpern et al. 2008) is likely to have considerable ecological consequences within the next century (Sala et al. 2000)	Intro	No	University of Aberdeen	No	0	1.474
572	Fisheries	2-3	2007	No	14	Male	USA	No	Yes	Yes	No	No	1	No	Yes	No	Sommer, T., C. Armor, R. Baxter, R. Breuer, L. Brown, M. Chotkowski, S. Culberson, F. Feyrer, M. Gingras, B. Herbold, W. Kimmerer, A. Mueller-Solger, M. Nobriga, and K. Souza. 2007. The collapse of pelagic fishes in the Upper San Francisco Estuary. Fisheries 32:270-277.	Yes	Fisheries	Fisheries	USA	The [fisheries] collapses are most pronounced in coastal regions, where declines have occurred on the scale of decades to millenia (Worm et al. 2006)	Intro	No	California Department of Water Resources	No	0	2.367
573	Fisheries	0-2	2011	No	6	Male	USA	No	Yes	Yes	No	No	1	No	No	No	Sommer, T., F. Mejia, K. Hieb, R. Baxter, E. Loboschefsky, and F. Loge. 2011. Long-Term Shifts in the Lateral Distribution of Age-0 Striped Bass in the San Francisco Estuary. Transactions of the American Fisheries Society 140:1451-1459.	Yes	Transactions of the American Fisheries Society	Fisheries	USA	The global decline in coastal resources […] These changes are apparently accelerating, but the ultimate consequences are unknown (Worm et al. 2006)	Intro	No	California Department of Water Resources	No	0	1.592
574	Policy	0-2	2012	No	4	Male	Europe	No	Yes	Yes	No	No	1	No	No	No	Spalding, M. D., V. N. Agostini, J. Rice, and S. M. Grant. 2012. Pelagic provinces of the world: A biogeographic classification of the world's surface pelagic waters. Ocean & Coastal Management 60:19-30.	Yes	Ocean & Coastal Management	Policy	United Kingdom	The fish communities inhabiting pelagic waters have undergone dramatic biological changes in recent decades, primarily as a result of growing high seas fishing impacts (FAO, 2007; Kura et al., 2004; Myers and Worm, 2003; Sibert et al., 2007; Worm et al., 2006)	Intro	No	The Nature Conservancy	No	0	1.333
575	Other	2-3	2009	No	15	Female	USA	No	No	Yes	No	No	1	No	Yes	No	Spitsbergen, J. M., V. S. Blazer, P. R. Bowser, K. C. Cheng, K. R. Cooper, T. K. Cooper, S. Frasca, D. B. Groman, C. M. Harper, J. M. Law, G. D. Marty, R. M. Smolowitz, J. S. Leger, D. C. Wolf, and J. C. Wolf. 2009. Finfish and aquatic invertebrate pathology resources for now and the future. Comparative Biochemistry and Physiology C-Toxicology & Pharmacology 149:249-257.	Yes	Comparative Biochemistry and Physiology C-Toxicology & Pharmacology	Other	USA	Stewardship of resources of aquatic species globally has fallen short of maintaining sustainable populations of key species (Caddy and Seijo, 2005; Worm et al., 2006)	Intro	No	Oregon State University	No	0	2.616
576	Ecology	3-5	2012	No	3	Male	USA	Yes	Yes	Yes	No	No	1	No	No	Yes	Spooner, D. E., C. C. Vaughn, and H. S. Galbraith. 2012. Species traits and environmental conditions govern the relationship between biodiversity effects across trophic levels. Oecologia 168:533-548.	Yes	Oecologia	Ecology	USA	A primary reason for concern over the current accelerated loss of species is the associated loss of ecological function (Naeem et al. 1994; Vitousek et al. 1997; Worm et al. 2006)	Intro	No	University of Oklahoma	No	0	3.412
577	Multidisciplinary	>5	2008	Yes	10	Female	USA	Yes	Yes	Yes	No	No	1	No	No	No	Srinivasan, U. T., S. P. Carey, E. Hallstein, P. A. T. Higgins, A. C. Kerr, L. E. Koteen, A. B. Smith, R. Watson, J. Harte, and R. B. Norgaard. 2008. The debt of nations and the distribution of ecological impacts from human activities. Proceedings of the National Academy of Sciences of the United States of America 105:1768-1773.	Yes	Proceedings of the National Academy of Sciences of the United States of America	Multidisciplinary	USA	Humanity is transforming ecosystems around the globe at an unprecedented speed and scale (1–4)	Intro	No	Pacific Ecoinformatics and Computational Ecology Laboratory	No	1	9.681
578	Policy	0-2	2012	Yes	3	Female	USA	No	No	Yes	No	No	5	No	Yes	No	Srinivasan, U. T., R. Watson, and U. R. Sumaila. 2012. Global fisheries losses at the exclusive economic zone level, 1950 to present. Marine Policy 36:544-549.	Yes	Marine Policy	Policy	USA	using catch trends as an indicator of stock biomass levels [17] // with the proportion of depleted stocks [...] increasing at different rates in others [17,19,20]. // While there have been many efforts to quantify when and to what extent fishing of a commercial stock may have crossed into unsustainability [16,17,20,22,23,25] // Compared to the other catch data-based […] method of Worm et al. [17]…	Intro / Methods	Yes	Pacific Ecoinformatics and Computational Ecology Laboratory	No	1	1.865
579	Ecology	>5	2007	Yes	3	Male	USA	No	No	Yes	Yes	No	8	No	No	Yes	Stachowicz, J. J., J. F. Bruno, and J. E. Duffy. 2007. Understanding the effects of marine biodiversity on communities and ecosystems. Pages 739-766 Annual Review of Ecology Evolution and Systematics.	Yes	Annual Review of Ecology Evolution and Systematics	Ecology	USA	Finally, the long history of detailed observational data collection on multiple trophic levels in oceanography has been exploited to assess the effects of natural diversity gradients at large scales, facilitating a better connection between changes in biodiversity and disruptions of ecosystem services than is currently possible in terrestrial systems (e.g., Frank et al. 2006, Worm et al. 2006) //…	Intro / Discussion / Conclusions	No	University of California, Davis	Yes	2	14.373
580	Multidisciplinary	3-5	2009	No	1	Male	USA	Yes	Yes	Yes	No	No	1	No	Yes	No	Stallings, C. D. 2009. Fishery-Independent Data Reveal Negative Effect of Human Population Density on Caribbean Predatory Fish Communities. Plos One 4.	Yes	PLoS One	Multidisciplinary	USA	It is well documented that humans have greatly altered predatory fish communities worldwide, especially through industrialized commercial and recreational fisheries [1–8]	Intro	No	Oregon State University	No	0	4.092
581	Other	2-3	2011	No	1	Male	USA	No	No	No	Yes	No	1	Yes	Yes	No	Stavins, R. N. 2011. The Problem of the Commons: Still Unsettled after 100 Years. American Economic Review 101:81-108.	Yes	American Economic Review	Economics	USA	In 2006, a group of scientists projected that at existing rates of ocean fisheries depletion, all commercial fisheries would collapse by the middle of the century (Boris Worm, et al. 2006)	Discussion	No	Harvard University	No	0	2.693
582	Other	2-3	2010	No	4	Female	Europe	No	No	Yes	No	No	1	No	No	Yes	Stelzenmuller, V., J. Lee, E. Garnacho, and S. I. Rogers. 2010. Assessment of a Bayesian Belief Network-GIS framework as a practical tool to support marine planning. Marine Pollution Bulletin 60:1743-1754.	Yes	Marine Pollution Bulletin	Other	Germany	However, the loss of biodiversity and weakening of ecosystem resilience are among the most debated consequences [of fishing activity] (Worm et al., 2006).	Intro	No	Institute of Sea Fisheries	No	0	2.503
583	Conservation	0-2	2009	No	3	Female	Europe	No	No	Yes	Yes	No	3	No	No	Yes	Stelzenmuller, V., F. Maynou, and P. Martin. 2009. Patterns of species and functional diversity around a coastal marine reserve: a fisheries perspective. Aquatic Conservation-Marine and Freshwater Ecosystems 19:554-565.	Yes	Aquatic Conservation-Marine and Freshwater Ecosystems	Conservation	United Kingdom	As yet, a global understanding of the interplay between fisheries effects and biological diversity conservation is lacking, especially how high biodiversity may enhance the value of commercial fisheries in adjacent areas, or how maintaining high biodiversity increases the ecosystem services provided by a marine reserve (Worm et al., 2006) // Worm et al. (2006) reported for large marine ecosystems…	Intro / Discussion	No	CEFAS, Lowestoft	No	0	1.929
584	Multidisciplinary	3-5	2011	No	3	Female	USA	No	Yes	Yes	No	No	1	No	No	No	Stephens, J. D., S. R. Santos, and D. R. Folkerts. 2011. Genetic Differentiation, Structure, and a Transition Zone among Populations of the Pitcher Plant Moth Exyra semicrocea: Implications for Conservation. Plos One 6.	Yes	PLoS One	Multidisciplinary	USA	However, less well known is the fact that temperate zone ecosystems including marine [2] […] environments are being adversely impacted at an even faster rate	Intro	No	Auburn University	No	0	4.092
585	Fisheries	0-2	2008	No	2	Male	USA	No	Yes	Yes	Yes	No	2	No	No	No	Stoner, A. W. and S. M. Kaimmer. 2008. Reducing elasmobranch bycatch: Laboratory investigation of rare earth metal and magnetic deterrents with spiny dogfish and Pacific halibut. Fisheries Research 92:162-168.	Yes	Fisheries Research	Fisheries	USA	Also, it is now recognized that declining populations of elasmobranchs might result in unintentional changes in ecological structure in both coastal and offshore waters (Worm et al., 2006; Myers et al., 2007) // The importance of conserving elasmobranchs is evident (Myers and Worm, 2003; Worm et al., 2006; Myers et al., 2007)	Intro / Discussion	No	Alaska Fisheries Science Center, NMFS, NOAA	No	0	1.586
586	Fisheries	0-2	2011	No	4	Male	Europe	Yes	Yes	Yes	No	No	1	No	Yes	No	Stouten, H., A. Heene, X. Gellynck, and H. Polet. 2011. Policy instruments to meet fisheries management objectives in Belgian fisheries. Fisheries Research 111:8-23.	Yes	Fisheries Research	Fisheries	Belgium	Since the mid-1990s, between 25 and 30% of world fisheries have become seriously overexploited (FAO, 2009; Worm et al., 2006)	Intro	No	Institute for Agriculture and Fisheries Research	No	0	1.586
587	Other	3-5	2009	No	4	Female	Europe	Yes	Yes	Yes	No	No	1	No	No	Yes	Striebel, M., S. Behl, S. Diehl, and H. Stibor. 2009. Spectral Niche Complementarity and Carbon Dynamics in Pelagic Ecosystems. American Naturalist 174:141-147.	Yes	American Naturalist	Other	Germany	There is growing concern that the worldwide loss of biodiversity may impair the functioning and stability of ecosystems and, thus, the ability of the biosphere to provide critical ecosystem services to the human population (Balmford et al. 2002; Worm et al. 2006)	Intro	No	Ludwig-Maximilians-Universita¨t Mu¨nchen	No	0	4.725
588	Other	>5	2010	No	2	Male	USA	No	No	No	Yes	No	1	Yes	Yes	No	Strong, D. R. and K. T. Frank. 2010. Human Involvement in Food Webs. Pages 1-+ in A. Gadgil and D. M. Liverman, editors. Annual Review of Environment and Resources, Vol 35.	Yes	Annual Review of Environment and Resources	Other	USA	Worm et al. (61) projected that by 2048 all commercially exploited fish stocks would collapse	Discussion	No	University of California, Davis	No	0	6.419
589	Ecology	>5	2011	No	1	Female	USA	No	No	No	Yes	No	1	No	No	Yes	Suding, K. N. 2011. Toward an Era of Restoration in Ecology: Successes, Failures, and Opportunities Ahead. Pages 465-487 in D. J. Futuyma, H. B. Shaffer, and D. Simberloff, editors. Annual Review of Ecology, Evolution, and Systematics, Vol 42.	Yes	Annual Review of Ecology, Evolution, and Systematics	Ecology	USA	Similarly,Worm et al. (2006) found that restoration of ocean biodiversity increased productivity fourfold	Discussion	No	University of California, Berkeley	No	0	14.373
590	Ecology	3-5	2008	No	5	Female	Europe	No	No	Yes	No	No	1	No	No	Yes	Sugden, H., M. Lenz, M. Molis, M. Wahl, and J. C. Thomason. 2008. The interaction between nutrient availability and disturbance frequency on the diversity of benthic marine communities on the north-east coast of England. Journal of Animal Ecology 77:24-31.	Yes	Journal of Animal Ecology	Ecology	United Kingdom	Increased diversity found in some more mature marine benthic communities has been shown to increase resilience to disturbances (Tilman, Reich & Knops 2006; Worm et al. 2006)	Intro	No	Newcastle University	No	0	4.937
591	Ecology	>5	2007	No	3	Male	USA	No	No	No	Yes	Yes	3	No	No	Yes	Sullivan, G., J. C. Callaway, and J. B. Zedler. 2007. Plant assemblage composition explains and predicts how biodiversity affects salt marsh functioning. Ecological Monographs 77:569-590.	Yes	Ecological Monographs	Ecology	USA	Plant assemblages with more species or functional groups typically have enhanced ecosystem functioning relative to monotypes (Balvanera et al. 2006, Cardinale et al. 2006, Worm et al. 2006) // In contrast, the results of meta-analyses by Worm et al. (2006), Balvanera et al. (2006), and Cardinale et al. (2006) overwhelmingly indicated that ecosystem services decline with biodiversity loss but that…	Discussion	No	The Wetlands Initiative	No	0	7.433
592	Other	None	2011	No	5	Male	Canada	No	No	Yes	No	No	1	No	No	No	Sumaila, U. R., W. W. L. Cheung, V. W. Y. Lam, D. Pauly, and S. Herrick. 2011. Climate change impacts on the biophysics and economics of world fisheries. Nature Climate Change 1:449-456.	Yes	Nature Climate Change	Other	Canada	Global marine fisheries are underperforming, mainly because of overfishing, but also because of pollution and other anthropogenic causes [8–10]	Intro	No	University of British Columbia	No	0	None
593	Fisheries	0-2	2007	Yes	7	Male	Canada	Yes	Yes	Yes	No	No	1	No	Yes	No	Sumaila, U. R., A. Khan, R. Watson, G. Munro, D. Zeller, N. Baron, and D. Pauly. 2007. The World Trade Organization and global fisheries sustainability. Fisheries Research 88:1-4.	Yes	Fisheries Research	Fisheries	Canada	While the threat of overfishing to world seafood supplies has been well publicized (e.g., Pauly et al., 2002; Worm et al., 2006)	Intro	No	University of British Columbia	No	1	1.586
594	Biology	2-3	2012	No	4	Male	USA	No	No	No	Yes	No	1	No	No	Yes	Summers, J. K., L. M. Smith, J. L. Case, and R. A. Linthurst. 2012. A Review of the Elements of Human Well-Being with an Emphasis on the Contribution of Ecosystem Services. Ambio 41:327-340.	Yes	Ambio	Biology	USA	Marine biodiversity loss is increasingly impairing the ocean’s capacity to provide food, maintain water quality, and recover from perturbations (Worm et al. 2006)	Discussion	No	Environmental Protection Agency	No	0	2.025
595	Other	3-5	2011	No	3	Male	Other	Yes	Yes	Yes	No	No	1	No	No	No	Sweatman, H., S. Delean, and C. Syms. 2011. Assessing loss of coral cover on Australia's Great Barrier Reef over two decades, with implications for longer-term trends. Coral Reefs 30:521-531.	Yes	Coral Reefs	Other	Australia	The effects of human activity are evident and widespread in both terrestrial and marine systems (Sanderson et al. 2002; Worm et al. 2006; Airoldi and Beck 2007; Halpern et al. 2008)	Intro	No	Australian Institute of Marine Science	No	0	3.878
596	Fisheries	0-2	2010	No	4	Male	Europe	No	No	No	Yes	No	1	No	No	No	Tacon, A. G. J., M. Metian, G. M. Turchini, and S. S. De Silva. 2010. Responsible Aquaculture and Trophic Level Implications to Global Fish Supply. Reviews in Fisheries Science 18:94-105.	Yes	Reviews in Fisheries Science	Fisheries	Spain	However, these trends [in fishing down marine food webs] are reversible with the implementation of improved ecosystem-based fishery management practices (Worm et al., 2006, 2009)	Discussion	No	University of Las Palmas	No	0	1.946
597	Other	3-5	2009	No	5	Male	Other	Yes	Yes	Yes	No	No	1	No	Yes	No	Takeuchi, Y., K. Higuchi, T. Yatabe, M. Miwa, and G. Yoshizaki. 2009. Development of Spermatogonial Cell Transplantation in Nibe Croaker, Nibea mitsukurii (Perciformes, Sciaenidae). Biology of Reproduction 81:1055-1063.	Yes	Biology of Reproduction	Other	Japan	Stocks and species diversity of wild fish are declining globally because of massive overfishing and environmental destruction [1, 2]	Intro	No	Tokyo University of Marine Science and Technology	No	0	4.009
598	Other	2-3	2009	No	6	Male	USA	No	Yes	Yes	No	No	2	Yes	Yes	No	Tal, Y., H. J. Schreier, K. R. Sowers, J. D. Stubblefield, A. R. Place, and Y. Zohar. 2009. Environmentally sustainable land-based marine aquaculture. Aquaculture 286:28-35.	Yes	Aquaculture	Other	USA	Human-driven erosion of marine biodiversity has recently been projected to lead to the collapse of all currently fished taxa by 2048 (Worm et al., 2006) // Reversing this trend, restoring marine biodiversity, and meeting the ever-increasing global demand for seafood will require [...] habitat restoration (Lotze et al., 2006; Worm et al., 2006)	Intro	No	University of Maryland Biotechnology Institute	No	0	2.041
599	Ecology	>5	2010	Yes	13	Female	USA	No	No	No	Yes	No	1	No	No	No	Teck, S. J., B. S. Halpern, C. V. Kappel, F. Micheli, K. A. Selkoe, C. M. Crain, R. Martone, C. Shearer, J. Arvai, B. Fischhoff, G. Murray, R. Neslo, and R. Cooke. 2010. Using expert judgment to estimate marine ecosystem vulnerability in the California Current. Ecological Applications 20:1402-1416.	Yes	Ecological Applications	Ecology	USA	Modeled results ranked commercial fishing as a top stressor in most offshore ecosystems […] as has been found by many others (e.g., Pauly et al. 1998, Myers and Worm 2003, Worm et al. 2006)	Discussion	No	University of California, Santa Barbara	No	3	5.102
600	Multidisciplinary	3-5	2011	No	3	Female	Europe	No	No	Yes	No	No	1	No	No	Yes	Teixido, N., J. Garrabou, and J. G. Harmelin. 2011. Low Dynamics, High Longevity and Persistence of Sessile Structural Species Dwelling on Mediterranean Coralligenous Outcrops. Plos One 6.	Yes	PLoS One	Multidisciplinary	Spain	Biodiversity losses in coastal marine ecosystems are increasingly impairing the ocean’s capacity to provide ecosystem services, such as food supplies, maintaining water quality, recreation and tourism [8], [9], [10].	Intro	No	University of Barcelona	No	0	4.092
601	Fisheries	2-3	2010	No	4	Female	Europe	Yes	Yes	Yes	No	No	1	No	Yes	No	Therkildsen, N. O., E. E. Nielsen, D. P. Swain, and J. S. Pedersen. 2010. Large effective population size and temporal genetic stability in Atlantic cod (Gadus morhua) in the southern Gulf of St. Lawrence. Canadian Journal of Fisheries and Aquatic Sciences 67:1585-1595.	Yes	Canadian Journal of Fisheries and Aquatic Sciences	Fisheries	Denmark	In recent years many commercial fish stocks have declined dramatically as a result of overfishing (Hutchings and Reynolds 2004; Worm et al. 2006)	Intro	No	University of Copenhagen	No	0	2.213
602	Other	0-2	2012	No	1	Female	USA	No	No	No	Yes	Yes	1	No	No	No	Thomas, J. A. 2012. Comment: Not Yet Far Enough. American Historical Review 117:794-803.	Yes	American Historical Review	Other	USA	But my understanding of the tensions between the hopes of human history and the determinations of our manifestly material nature have been sharpened, and I would come with new criteria for the formation of historical knowledge: On fish depletion, see [Worm et al. 2006]	Discussion	No	University of Notre Dame	No	0	1.103
603	Policy	0-2	2008	No	1	Male	Canada	No	Yes	Yes	No	No	1	Yes	Yes	No	Thompson, M. H. 2008. Fostering sustainable behaviours in community-based co-managed fisheries. Marine Policy 32:413-420.	Yes	Marine Policy	Policy	Canada	there is now mounting evidence that the world’s commercial fisheries may face complete collapse by the middle of the 21st century [4]	Intro	No	Dalhousie University	No	0	1.865
604	Policy	0-2	2008	No	3	Male	Canada	Yes	Yes	Yes	No	No	2	No	No	No	Thompson, M. H., C. P. Dumont, and C. F. Gaymer. 2008. ISO 14001: Towards international quality environmental management standards for marine protected areas. Ocean & Coastal Management 51:727-739.	Yes	Ocean & Coastal Management	Policy	Canada	The world’s oceans are facing ever increasing human pressures resulting in the declining health of most marine ecosystems [1–4] // In part, it is suggested that these trends can be slowed if not reversed with increased conservation of the marine environment through the development of Marine Protected Areas (MPAs) [2,4–6]	Intro	No	Dalhousie University	No	0	1.333
605	Fisheries	2-3	2012	No	3	Male	USA	No	No	Yes	No	No	3	Yes	Yes	No	Thorson, J. T., T. A. Branch, and O. P. Jensen. 2012. Using model-based inference to evaluate global fisheries status from landings, location, and life history data. Canadian Journal of Fisheries and Aquatic Sciences 69:645-655.	Yes	Canadian Journal of Fisheries and Aquatic Sciences	Fisheries	USA	The use of landings data as a proxy for stock biomass famously led to the prediction that current trends would result in the collapse of all fish stocks by 2048 (Worm et al. 2006) // Analyses of biomass and landings time series were restricted to stocks with a total catch summed across 1950–2008 greater than 10 000 t to match the methods used in Worm et al. (2006) // another widely used method fo…	Intro / Methods	Yes	University of Washington	No	0	2.213
606	Policy	0-2	2012	No	4	Female	Europe	No	Yes	Yes	No	No	1	No	No	Yes	Thurstan, R. H., J. P. Hawkins, L. Neves, and C. M. Roberts. 2012. Are marine reserves and non-consumptive activities compatible? A global analysis of marine reserve regulations. Marine Policy 36:1096-1104.	Yes	Marine Policy	Policy	United Kingdom	Marine reserves […] have been shown to effectively protect biodiversity and enable ecosystem recovery [5–7]	Intro	No	University of York	No	0	1.865
607	Multidisciplinary	3-5	2010	No	2	Female	Europe	No	No	No	Yes	No	2	No	No	Yes	Thurstan, R. H. and C. M. Roberts. 2010. Ecological Meltdown in the Firth of Clyde, Scotland: Two Centuries of Change in a Coastal Marine Ecosystem. Plos One 5.	Yes	PLoS One	Multidisciplinary	United Kingdom	studies have shown that populations in low diversity ecosystems are naturally less stable than those in more diverse ones as they are at higher risk from disease, invasion and changes in environmental conditions [92] // Fishery management in the Firth of Clyde and other similarly affected marine ecosystems needs to change from the current species-centred approach to one which takes into account t…	Discussion	No	University of York	No	0	4.092
608	Other	0-2	2009	No	9	Female	Europe	No	No	No	Yes	No	1	No	No	No	Tin, T., Z. L. Fleming, K. A. Hughes, D. G. Ainley, P. Convey, C. A. Moreno, S. Pfeiffer, J. Scott, and I. Snape. 2009. Impacts of local human activities on the Antarctic environment. Antarctic Science 21:3-33.	Yes	Antarctic Science	Other	France	This introduces the possibility of trophic cascades rippling through foodwebs at the community level, with changes in the medium-term biodiversity and relative abundance of other species in the demersal community (Worm et al. 2006)	Discussion	No	Antarctic Southern Ocean Coalition	No	0	1.556
609	Policy	0-2	2010	No	3	Male	Other	No	Yes	Yes	No	No	1	Yes	Yes	Yes	Tironi, A., V. H. Marin, and F. J. Campuzano. 2010. A Management Tool for Assessing Aquaculture Environmental Impacts in Chilean Patagonian Fjords: Integrating Hydrodynamic and Pellets Dispersion Models. Environmental Management 45:953-962.	Yes	Environmental Management	Policy	Chile	Direct impacts over biodiversity, habitat destruction and waste disposal, along with climate change indirect effects -and a possible synergy between these factors- allow predicting the collapse of all harvested taxa by the year 2048, if we sustain today’s trend of use and extraction (Harley and Hughes 2006; Worm and others 2006)	Intro	No	Universidad de Chile	No	0	1.744
610	Ecology	>5	2007	Yes	4	Male	Canada	No	No	No	Yes	No	1	No	No	No	Tittensor, D. P., F. Micheli, M. Nystrom, and B. Worm. 2007. Human impacts on the species-area relationship reef fish assemblages. Ecology Letters 10:760-772.	Yes	Ecology Letters	Ecology	Canada	Species diversity can therefore be expected to be higher in protected areas at larger spatial scales (Worm et al. 2006)	Discussion	No	Dalhousie University	No	2	17.557
611	Conservation	3-5	2009	No	3	Male	Other	Yes	Yes	Yes	No	No	1	No	No	No	Tognelli, M. F., M. Fernandez, and P. A. Marquet. 2009. Assessing the performance of the existing and proposed network of marine protected areas to conserve marine biodiversity in Chile. Biological Conservation 142:3147-3153.	Yes	Biological Conservation	Conservation	Chile	The profound and burgeoning influence of humans on marine ecosystems has prompted the creation of marine protected areas (Allison et al., 1998; Zacharias and Gregr, 2005; Worm et al., 2006; Halpern et al., 2008; Mora and Ginsburg, 2008)	Intro	No	Pontificia Universidad Católica de Chile	No	0	4.115
612	Multidisciplinary	3-5	2010	No	2	Male	USA	No	Yes	Yes	Yes	No	2	No	No	Yes	Tolimieri, N. and M. J. Anderson. 2010. Taxonomic Distinctness of Demersal Fishes of the California Current: Moving Beyond Simple Measures of Diversity for Marine Ecosystem-Based Management. Plos One 5.	Yes	PLoS One	Multidisciplinary	USA	For example, documenting patterns in biodiversity might also be important due to its potential relationship with ecosystem function [4–10] // At another level, the potential relationship between ecosystem function and biodiversity also makes the maintenance of richness a priority [6,8–10]	Intro / Discussion	No	Northwest Fisheries Science Center, NMFS, NOAA	No	0	4.092
613	Conservation	3-5	2011	Yes	6	Male	Canada	Yes	Yes	Yes	No	No	1	No	No	No	Trebilco, R., B. S. Halpern, J. M. Flemming, C. Field, W. Blanchard, and B. Worm. 2011. Mapping species richness and human impact drivers to inform global pelagic conservation prioritisation. Biological Conservation 144:1758-1766.	Yes	Biological Conservation	Conservation	Canada	Many marine ecosystems have come under severe stress from increasing human impacts (Halpern et al., 2008; Myers and Worm, 2003; Nellman et al., 2008; Roberts, 2003; Sala and Knowlton, 2006; Worm et al., 2006)	Intro	No	Simon Fraser University	No	2	4.115
614	Other	>5	2009	No	6	Female	USA	No	Yes	Yes	No	No	1	No	No	No	Truong, H., J. R. DiBello, E. Ruiz-Narvaez, P. Kraft, H. Campos, and A. Baylin. 2009. Does genetic variation in the Delta(6)-desaturase promoter modify the association between alpha-linolenic acid and the prevalence of metabolic syndrome? American Journal of Clinical Nutrition 89:920-925.	Yes	American Journal of Clinical Nutrition	Other	USA	given the growing concern about the sustainability of the world’s fisheries (13)	Intro	No	Brown University	No	0	6.669
615	Other	0-2	2009	No	1	Male	USA	No	No	No	Yes	No	1	Yes	Yes	No	Tschirhart, J. 2009. Integrated Ecological-Economic Models. Pages 381-407 Annual Review of Resource Economics.	Yes	Annual Review of Resource Economics	Economics	USA	Worm et al. (2006) projected collapse of all currently harvested marine species by the mid-twenty-first century	Discussion	No	University of Wyoming	No	0	1.745
616	Other	3-5	2012	No	4	Male	Other	No	No	No	Yes	No	1	No	Yes	No	Turchini, G. M., P. D. Nichols, C. Barrow, and A. J. Sinclair. 2012. Jumping on the Omega-3 Bandwagon: Distinguishing the Role of Long-Chain and Short-Chain Omega-3 Fatty Acids. Critical Reviews in Food Science and Nutrition 52:795-803.	Yes	Critical Reviews in Food Science and Nutrition	Other	Australia	However, the current exploitation trends of the wild stocks are considered by many fishery and conservation scientists as unsustainable (Pauly et al., 2005; Tibbetts, 2004;Worm et al., 2006; 2007)	Discussion	No	Deakin University	No	0	4.789
617	Other	3-5	2009	No	3	Male	Other	No	No	Yes	No	No	2	Yes	Yes	No	Turchini, G. M., B. E. Torstensen, and W. K. Ng. 2009. Fish oil replacement in finfish nutrition. Reviews in Aquaculture 1:10-57.	Yes	Reviews in Aquaculture	Other	Australia	Based on current exploitation trends, some scientists have predicted a collapse of all species of wild seafood that are currently fished by the year 2050 (Worm et al. 2006) // the aquaculture industry is under intense criticism from both scientists and environmental groups with regard to the long-term ecological sustainability of these finite fishery resources (Naylor et al. 2000; Worm et al. 200…	Intro	No	Deakin University	No	0	4.036
618	Other	0-2	2009	No	1	Male	Canada	No	No	Yes	No	No	1	No	No	Yes	Turkington, R. 2009. Top-down and bottom-up forces in mammalian herbivore - vegetation systems: an essay review. Botany-Botanique 87:723-739.	Yes	Botany-Botanique	Other	Canada	The relative effect of these forces is becoming increasingly important as humans alter the function and services of ecosystems (Millenium Ecosystem Assessment 2005; Worm et al. 2006)	Intro	No	University of British Columbia	No	0	1.251
619	Other	0-2	2009	No	4	Female	USA	No	No	No	Yes	No	1	No	No	Yes	Turnipseed, M., S. E. Roady, R. Sagarin, and L. B. Crowder. 2009. The Silver Anniversary of the United States' Exclusive Economic Zone: Twenty-Five Years of Ocean Use and Abuse, and the Possibility of a Blue Water Public Trust Doctrine. Ecology Law Quarterly 36:1-70.	Yes	Ecology Law Quarterly	Other	USA	More generally, biodiversity loss can affect primary and secondary productivity, resource use, nutrient cycling, and ecosystem resilience (i.e., the ability to either withstand or recover quickly from disturbances). [338]	Discussion	No	Duke University	No	0	0.529
620	Other	0-2	2010	No	3	Male	Other	No	No	Yes	No	No	1	No	No	No	Unnikrishnan, U., K. Chakraborty, and R. Paulraj. 2010. Efficacy of various lipid supplements in formulated pellet diets for juvenile Scylla serrata. Aquaculture Research 41:1498-1513.	Yes	Aquaculture Research	Other	India	the aquaculture industry is under intense criticism from both scientists and environmentalists with regard to the long-term ecological sustainability of these finite fishery resources (Naylor et al. 2000; Worm et al. 2006)	Intro	No	Central Marine Fisheries Research Institute	No	0	1.203
621	Ecology	>5	2009	No	3	Male	Other	No	No	No	Yes	Yes	1	No	No	Yes	Uthicke, S., B. Schaffelke, and M. Byrne. 2009. A boom-bust phylum? Ecological and evolutionary consequences of density variations in echinoderms. Ecological Monographs 79:3-24.	Yes	Ecological Monographs	Ecology	Australia	Similar to terrestrial environments, diversity and redundancy in marine ecosystems is crucial for ecosystem functioning, productivity, and resilience (Worm et al. 2006)	Discussion	No	Australian Institute of Marine Science	No	0	7.433
622	Policy	0-2	2009	No	7	Male	Other	No	No	Yes	No	No	1	No	No	Yes	van der Elst, R. P., J. C. Groeneveld, A. P. Baloi, F. Marsac, K. I. Katonda, R. K. Ruwa, and W. L. Lane. 2009. Nine nations, one ocean: A benchmark appraisal of the South Western Indian Ocean Fisheries Project (2008-2012). Ocean & Coastal Management 52:258-267.	Yes	Ocean & Coastal Management	Policy	South Africa	The relationships between ecosystem services, fisheries, biodiversity and the environmental impacts of fisheries are also largely unknown, although these have become major global research themes [4–7]	Intro	No	Oceanographic Research Institute	No	0	1.333
623	Ecology	2-3	2012	No	6	Male	Europe	No	Yes	Yes	No	No	2	No	No	Yes	van der Linden, P., J. Patricio, A. Marchini, N. Cid, J. M. Neto, and J. C. Marques. 2012. A biological trait approach to assess the functional composition of subtidal benthic communities in an estuarine ecosystem. Ecological Indicators 20:121-133.	Yes	Ecological Indicators	Ecology	Portugal	Centuries of overexploitation, habitat destruction and pollution have modified the rates of natural replacement and exchange of estuarine species, and increased species invasions and species extinctions (Loreau et al., 2001; Hooper et al., 2005; Lotze et al., 2006; Worm et al., 2006) // These changes represent a great influence over natural balance and dynamics and have a strong potential to alte…	Intro	No	University of Coimbra	No	0	2.695
624	Other	>5	2011	No	2	Female	USA	No	No	No	Yes	No	1	No	No	No	Van Eenennaam, A. L. and W. M. Muir. 2011. Transgenic salmon: a final leap to the grocery shelf? Nature Biotechnology 29:706-710.	Yes	Nature Biotechnology	Other	USA	One of the benefits associated with the development of GE [genetically engineered] fish for aquaculture may well be in helping to reduce recognized pressure on wild fish populations [26]	Discussion	No	University of California, Davis	No	0	23.268
625	Policy	0-2	2011	No	2	Female	Europe	No	Yes	Yes	No	No	1	No	No	No	van Haastrecht, E. K. and H. M. Toonen. 2011. Science-Policy Interactions in MPA Site Selection in the Dutch Part of the North Sea. Environmental Management 47:656-670.	Yes	Environmental Management	Policy	The Netherlands	Over the past years, this has led to the realisation that broader ecological values such as biodiversity need to be taken into account (Worm and others 2006)	Intro	No	University of Amsterdam	No	0	1.744
626	Biology	2-3	2007	No	5	Male	Europe	No	Yes	Yes	No	No	1	No	No	Yes	Verbeke, W., F. Vanhonacker, I. Sioen, J. Van Camp, and S. De Henauw. 2007. Perceived importance of sustainability and ethics related to fish: A consumer behavior perspective. Ambio 36:580-585.	Yes	Ambio	Biology	Belgium	as well as an urgent need to adopt more sustainable fisheries management to restore marine biodiversity and safeguard the contribution of fisheries to food security (16, 17)	Intro	No	Ghent University	No	0	2.025
627	Ecology	0-2	2007	No	5	Male	USA	No	No	No	Yes	Yes	1	No	No	Yes	Verburg, P., S. S. Kilham, C. M. Pringle, K. R. Lips, and D. L. Drake. 2007. A stable isotope study of a neotropical stream food web prior to the extirpation of its large amphibian community. Journal of Tropical Ecology 23:643-651.	Yes	Journal of Tropical Ecology	Ecology	USA	The loss of biodiversity can severely impair ecosystem services (Worm et al. 2006)	Discussion	No	University of Georgia	No	0	1.401
628	Ecology	3-5	2009	No	1	Male	Europe	No	No	Yes	No	No	1	No	No	No	Vermaat, J. E. 2009. Linking clonal growth patterns and ecophysiology allows the prediction of meadow-scale dynamics of seagrass beds. Perspectives in Plant Ecology Evolution and Systematics 11:137-155.	Yes	Perspectives in Plant Ecology Evolution and Systematics	Ecology	The Netherlands	Seagrass beds are considered to function as important coastal filters for nutrients and pollutants (Ward et al., 1984; Lemmens et al., 1996; Worm et al., 2006)	Intro	No	Vrije Universiteit Amsterdam	No	0	3.208
629	Ecology	>5	2011	No	2	Female	Europe	No	Yes	Yes	No	No	1	No	No	No	Villnas, A. and A. Norkko. 2011. Benthic diversity gradients and shifting baselines: implications for assessing environmental status. Ecological Applications 21:2172-2186.	Yes	Ecological Applications	Ecology	Finland	At the same time, continuing losses of biodiversity in coastal and regional seas (Gray 1997, Lotze et al. 2006, Worm et al. 2006)	Intro	No	Finnish Environment Institute	No	0	5.102
630	Policy	0-2	2012	No	1	Male	Europe	No	No	No	No	No	3	No	No	No	Villasante, S. 2012. The management of the blue whiting fishery as complex social-ecological system: The Galician case. Marine Policy 36:1301-1308.	Yes	Marine Policy	Policy	Spain	In the absence of official and public information relating to direct fishing effort exerted on the stock in each of the northern and southern areas, reported catches may represent a proxy that allows the impact of fishing to be examined [32] // In this way, following the methodology used by [32,33,36,37], catches of blue whiting throughout the period for which ICES provides data (1998–2009) can b…	Methods / Results	Yes	University of Santiago de Compostela	No	0	1.865
631	Fisheries	>5	2011	No	4	Male	Europe	No	No	Yes	No	No	2	No	No	Yes	Villasante, S., M. D. Garcia-Negro, F. Gonzalez-Laxe, and G. R. Rodriguez. 2011. Overfishing and the Common Fisheries Policy: (un)successful results from TAC regulation? Fish and Fisheries 12:34-50.	Yes	Fish and Fisheries	Fisheries	Sweden	As consequence, it is clear that deteriorating biodiversity impairs a marine ecosystem’s capacity to provide food, maintain water quality, and recover from perturbations (Peterson and Lubchenco 1997; Worm et al. 2006) // There are several ways to evaluate the status of fishery resources, but each has its limitations and a different range of uncertainties (Hilborn et al. 2003; Worm et al. 2006)	Intro / Methods	Yes	The Royal Swedish Academy of Sciences	No	0	5.8
632	Policy	0-2	2012	No	5	Male	Europe	No	No	Yes	No	No	3	No	Yes	Yes	Villasante, S., D. Rodriguez, M. Antelo, M. Quaas, and H. Osterblom. 2012. The Global Seafood Market Performance Index: A theoretical proposal and potential empirical applications. Marine Policy 36:142-152.	Yes	Marine Policy	Policy	Spain	Many cases of profound changes have occurred in marine ecosystems […] with severe impacts on the flows of goods and services they generate [26] // Here, we follow the methodology proposed in [26], who defined the fisheries collapse when catches dropping below 10% of the recorded maximum // Catches in volume 10% catches to avoid collapse Worm et al. [26]	Intro / Methods	Yes	University of Santiago de Compostela	No	0	1.865
633	Policy	0-2	2010	No	2	Male	Europe	No	Yes	Yes	No	No	1	No	No	No	Villasante, S. and U. R. Sumaila. 2010. Estimating the effects of technological efficiency on the European fishing fleet. Marine Policy 34:720-722.	Yes	Marine Policy	Policy	Spain	These declines [in marine abundance] translate to […] unpredictable consequences on marine ecosystems services [11]	Intro	No	University of Santiago de Compostela	No	0	1.865
634	Ecology	2-3	2012	No	4	Male	Europe	No	Yes	Yes	No	No	2	No	No	Yes	Villeger, S., F. Ferraton, D. Mouillot, and R. de Wit. 2012. Nutrient recycling by coastal macrofauna: intra- versus interspecific differences. Marine Ecology-Progress Series 452:297-303.	Yes	Marine Ecology-Progress Series	Ecology	France	modify the biodiversity of coastal communities (e.g. Villeger et al. 2010), which, in turn, affects ecosystem functioning and stability (Raffaelli et al. 2003, Solan et al. 2004, Worm et al. 2006, Bracken et al. 2008) // In the context of marine biodiversity loss (Worm et al. 2006, Bracken et al. 2008)	Intro	No	Université Montpellier	No	0	2.711
635	Other	2-3	2011	No	3	Female	Europe	No	Yes	Yes	No	No	2	No	No	Yes	Villnas, A., J. Perus, and E. Bonsdorff. 2011. Structural and functional shifts in zoobenthos induced by organic enrichment - Implications for community recovery potential. Journal of Sea Research 65:8-18.	Yes	Journal of Sea Research	Other	Finland	since total catches in the world's fishing areas generally have reached their maximum potential for capture (Worm et al., 2006; FAO, 2007) // While still debated, there is however evidence for that higher diversity is likely to increase the stability of communities against perturbations (McCann, 2000; Worm et al., 2006)	Intro	No	Finnish Environment Institute	No	0	2.598
636	Fisheries	2-3	2011	No	6	Male	Europe	No	Yes	Yes	No	No	1	No	Yes	No	Vinas, J., A. Gordoa, R. Fernandez-Cebrian, C. Pla, U. Vahdet, and R. M. Araguas. 2011. Facts and uncertainties about the genetic population structure of Atlantic bluefin tuna (Thunnus thynnus) in the Mediterranean. Implications for fishery management. Reviews in Fish Biology and Fisheries 21:527-541.	Yes	Reviews in Fish Biology and Fisheries	Fisheries	Spain	A particular concern is fish species that are harvested by humans and, in most cases, overfished (Worm et al. 2006)	Intro	No	Universitat de Girona	No	0	2.5
637	Fisheries	0-2	2011	No	3	Female	Canada	No	No	Yes	No	No	1	No	No	No	Vincent, A. C. J., S. J. Foster, and H. J. Koldewey. 2011. Conservation and management of seahorses and other Syngnathidae. Journal of Fish Biology 78:1681-1724.	Yes	Journal of Fish Biology	Fisheries	Canada	Despite large increases in global fishing effort, cumulative yields across all species and large marine ecosystems have declined by 13% since passing a maximum in 1994 (Worm et al., 2006)	Intro	No	University of British Columbia	No	0	1.685
638	Other	0-2	2008	No	7	Male	Europe	No	Yes	Yes	Yes	No	2	No	No	Yes	Volckaert, F., M. Barbier, A. V. M. Canario, J. L. Olsen, J. Wesnigk, M. Clark, and C. Boyen. 2008. Empowering marine science through genomics. Marine Genomics 1:33-35.	Yes	Marine Genomics	Other	Belgium	Therefore linking the latest developments in oceanographic hardware and genomics laboratory-based techniques provides opportunities for comprehensively understanding global marine biodiversity and ecosystem function at a time when both are severely threatened (Worm et al., 2006) // The result is a decrease of the average food chain length, which reduces ecosystem stability and could lead to an ir…	Intro / Discussion	No	Katholieke Universiteit Leuven	No	0	1.551
639	Other	0-2	2010	No	1	Female	Europe	No	No	No	Yes	No	1	Yes	Yes	No	Wakefield, J. 2010. Sustainability and Socio-Economic Need in the Common Fisheries Policy. European Law Review 35:476-496.	Yes	European Law Review	Other	United Kingdom	World wide, 29 percent of fish stocks exploited in 2005 have collapsed, and the extrapolation is that by 2048 all fish and shellfish species currently fished will have collapsed. [130]	Discussion	No	University of Warwick	No	0	0.817
640	Fisheries	2-3	2008	No	3	Male	Canada	No	No	No	Yes	No	1	No	Yes	No	Walters, C. J., R. Hilborn, and V. Christensen. 2008. Surplus production dynamics in declining and recovering fish populations. Canadian Journal of Fisheries and Aquatic Sciences 65:2536-2551.	Yes	Canadian Journal of Fisheries and Aquatic Sciences	Fisheries	Canada	Such diagnostics are particularly important in current debates about how to interpret evidence of stock collapse based on catch time series data (Worm et al. 2006; Longhurst 2007; Branch 2008)	Discussion	No	University of British Columbia	No	0	2.213
641	Multidisciplinary	>5	2009	No	14	Female	Other	Yes	Yes	Yes	Yes	No	2	No	No	Yes	Waycott, M., C. M. Duarte, T. J. B. Carruthers, R. J. Orth, W. C. Dennison, S. Olyarnik, A. Calladine, J. W. Fourqurean, K. L. Heck, A. R. Hughes, G. A. Kendrick, W. J. Kenworthy, F. T. Short, and S. L. Williams. 2009. Accelerating loss of seagrasses across the globe threatens coastal ecosystems. Proceedings of the National Academy of Sciences of the United States of America 106:12377-12381.	Yes	Proceedings of the National Academy of Sciences of the United States of America	Multidisciplinary	Australia	Coastal ecosystems such as salt marshes, coral reefs, mangroves, and seagrasses have declined, leading to growing concern because they have recognized ecological and economic values (1–5) // Seagrass losses decrease primary production, carbon sequestration, and nutrient cycling in the coastal zone (5)	Intro / Discussion	No	James Cook University	No	0	9.681
642	Biology	3-5	2009	No	1	Male	Europe	No	No	No	Yes	No	1	No	No	Yes	Webb, T. J. 2009. Biodiversity research sets sail: showcasing the diversity of marine life. Biology Letters 5:145-147.	Yes	Biology Letters	Biology	United Kingdom	As Emmett Duffy (Virginia Institute of Marine Science) showed, experiments have revealed that systems with higher species diversity in general tend to have higher ‘function’ (primary production, nutrient cycling, trophic transfer, etc.); he suggests that these patterns are also seen for example in the functional consequences of global fisheries declines (Worm et al. 2006)	Discussion	No	University of Sheffield	No	0	3.762
643	Ecology	2-3	2009	No	3	Male	Europe	No	Yes	Yes	No	No	1	No	No	Yes	Webb, T. J., E. H. M. Tyler, and P. J. Somerfield. 2009. Life history mediates large-scale population ecology in marine benthic taxa. Marine Ecology-Progress Series 396:293-306.	Yes	Marine Ecology-Progress Series	Ecology	United Kingdom	Yet it is vital that we understand fundamental patterns in the distribution and abundance of marine taxa so that we can predict […] the likely consequences of these responses on the ecosystem services provided by the marine environment (Worm et al. 2006)	Intro	No	University of Sheffield	No	0	2.711
644	Fisheries	0-2	2010	No	7	Male	USA	No	No	No	Yes	No	1	Yes	Yes	No	Welch, A., R. Hoenig, J. Stieglitz, D. Benetti, A. Tacon, N. Sims, and B. O'Hanlon. 2010. From Fishing to the Sustainable Farming of Carnivorous Marine Finfish. Reviews in Fisheries Science 18:235-247.	Yes	Reviews in Fisheries Science	Fisheries	USA	Given present rates of extraction, Worm et al. (2006) have predicted a complete collapse of all global fisheries by 2048 and it isn’t certain that these fish can return	Discussion	No	University of Miami	No	0	1.946
645	Fisheries	2-3	2009	No	4	Male	Europe	Yes	Yes	Yes	No	No	1	No	Yes	No	West, C. D., C. Dytham, D. Righton, and J. W. Pitchford. 2009. Preventing overexploitation of migratory fish stocks: the efficacy of marine protected areas in a stochastic environment. Ices Journal of Marine Science 66:1919-1930.	Yes	ICES Journal of Marine Science	Fisheries	United Kingdom	Marine protected areas (MPAs) have been advocated as a way to slow or reverse the decline in fish stocks and biodiversity in our oceans attributed to overfishing (Worm et al., 2006, 2007)	Intro	No	University of York	No	0	2.007
646	Ecology	0-2	2009	No	1	Male	USA	No	No	Yes	No	No	2	No	Yes	No	White, C. 2009. Density dependence and the economic efficacy of marine reserves. Theoretical Ecology 2:127-138.	Yes	Theoretical Ecology	Ecology	USA	Current depletion of many fisheries species stocks to <10–20% their original levels (Myers and Worm 2003; Stobutzki et al. 2006; Worm et al. 2006) marks an upper limit of when this [cessation of fishing] may occur in some modern fisheries (for a discussion of exceptions, see Essington et al. 2006; Polacheck 2006) // Many fisheries [...] are still able to profitably exploit populations to <10–20% …	Intro / Methods	Yes	University of California, Santa Barbara	No	0	1.545
647	Ecology	>5	2008	No	5	Male	USA	No	No	No	No	No	1	No	Yes	No	White, C., B. E. Kendall, S. Gaines, D. A. Siegel, and C. Costello. 2008. Marine reserve effects on fishery profit. Ecology Letters 11:370-379.	Yes	Ecology Letters	Ecology	USA	When left without escapement restrictions, modern fisheries worldwide have demonstrated their ability to exploit fish populations to remarkably low escapement levels (i.e. < 20% of original stock), and maintain over many years sufficient harvest pressures for preventing recovery of stocks from those low levels (Lipcius & Stockhausen 2002; Cardinale & Svedang 2004; Worm et al. 2006)	Methods	Yes	University of California, Santa Barbara	No	0	17.557
648	Ecology	>5	2010	No	4	Male	USA	No	Yes	Yes	No	No	1	No	No	Yes	White, J. W., L. W. Botsford, E. A. Moffitt, and D. T. Fischer. 2010. Decision analysis for designing marine protected areas for multiple species with uncertain fishery status. Ecological Applications 20:1523-1541.	Yes	Ecological Applications	Ecology	USA	While several recent studies have touted the benefits of MPA implementation for population sustainability, biodiversity, and ecosystem services (Mumby et al. 2006, Worm et al. 2006)	Intro	No	University of California, Davis	No	0	5.102
649	Ecology	>5	2008	Yes	3	Male	Canada	No	Yes	Yes	No	No	1	No	No	Yes	Whitehead, H., B. McGill, and B. Worm. 2008. Diversity of deep-water cetaceans in relation to temperature: implications for ocean warming. Ecology Letters 11:1198-1207.	Yes	Ecology Letters	Ecology	Canada	Observations and experiments in both aquatic and terrestrial ecosystems have indicated that eroding biodiversity, both at the genetic and species level, can make ecosystems less resilient, and more vulnerable to climate change and other perturbations (Tilman & Downing 1994; Loreau et al. 2001; Reusch et al. 2005; Worm et al. 2006)	Intro	No	Dalhousie University	No	1	17.557
650	Policy	0-2	2010	No	5	Female	Canada	Yes	Yes	Yes	No	No	1	No	Yes	No	Wiber, M. G., M. A. Rudd, E. Pinkerton, A. T. Charles, and A. Bull. 2010. Coastal management challenges from a community perspective: The problem of 'stealth privatization' in a Canadian fishery. Marine Policy 34:598-605.	Yes	Marine Policy	Policy	Canada	Around the world, many vital marine fish, shellfish stocks, and other ecosystem services are under significant stress [1,2]	Intro	No	University of New Brunswick	No	0	1.865
651	Ecology	0-2	2008	No	2	Female	Europe	No	No	No	Yes	No	1	No	No	Yes	Widdicombe, S. and J. I. Spicer. 2008. Predicting the impact of ocean acidification on benthic biodiversity: What can animal physiology tell us? Journal of Experimental Marine Biology and Ecology 366:187-197.	Yes	Journal of Experimental Marine Biology and Ecology	Ecology	United Kingdom	This is despite the fact that the relationship between biodiversity and ecosystem functions has been a defining feature of ecology in the last decade (Chapin et al., 1998; Loreau et al., 2001), and that investigation and discussions have at last encompassed marine habitats (e.g., Gessner et al., 2004; Worm et al., 2006)	Discussion	No	Plymouth Marine Laboratory	No	0	1.875
652	Multidisciplinary	>5	2007	No	2	Male	USA	Yes	Yes	Yes	Yes	Yes	13	Yes	Yes	No	Wilberg, M. J. and T. J. Miller. 2007. Comment on "Impacts of biodiversity loss on ocean ecosystem services". Science 316.	Yes	Science	Multidisciplinary	USA	Worm et al. (Research Articles, 3 November 2006, p. 787) reported an increasing proportion of fisheries in a “collapsed” state. // Based on an analysis of commercial catch data from 64 large marine ecosystems (LMEs) spanning from 1950 to 2003, Worm et al. (1) reported that an increasing proportion of fisheries were in a “collapsed” state. // Extrapolation of these data further suggested the poten…	Abstract / Discussion	No	University of Maryland	No	0	32.452
653	Other	2-3	2008	No	2	Male	USA	No	No	Yes	No	No	1	Yes	Yes	No	Wong, A. C. and A. L. Van Eenennaam. 2008. Transgenic approaches for the reproductive containment of genetically engineered fish. Aquaculture 275:1-12.	Yes	Aquaculture	Other	USA	Unfortunately, such concerns may become a moot point if there is a global collapse of all taxa currently fished by the mid-21st century as has been suggested by some reports (Worm et al., 2006)	Intro	No	University of California, Davis	No	0	2.041
654	Other	3-5	2008	No	2	Male	Canada	No	No	No	Yes	No	1	Yes	Yes	No	Wong, E. H. K. and R. H. Hanner. 2008. DNA barcoding detects market substitution in North American seafood. Food Research International 41:828-837.	Yes	Food Research International	Other	Canada	This is a pressing concern across all fish species currently being harvested, as a global collapse of all fisheries is expected by the mid-21st century (Worm et al., 2006)	Conclusions	No	University of Guelph	No	0	3.15
[truncated: 12 more rows]
